# Supplementary material for: Comparative Genomic Analysis and a Novel Set of Missense Mutation of the Leptospira weilii Serogroup Mini From the Urine of Asymptomatic Dogs in Thailand
Source: Front Microbiol. 2021 Oct 18;12:731937. doi: 10.3389/fmicb.2021.731937 (PMC8558515; doi:10.3389/fmicb.2021.731937)
Supplement: Supplementary file 1 [file Data_Sheet_1.xlsx]

## Sheet: Table S1
Supplemetary data SD1, Table S1. Serotyping identification with polyclnal antibodies in Leptospira weilii strains CUDO6 and CUD13
Reference antibodies			Tested strains
Serogroup	Serovar	Strain	CUDO6	CUD13
Australis	Australis	Ballico	0	0
Australis	Bratislava	Jez Bratislava	0	0
Autumnalis	Bangkinang	Bangkinang I	0	0
Autumnalis	Butembo	Butmbo	0	0
Autumnalis	Carlos	C3	0	0
Autumnalis	Rachmati	Rachmat	0	01:20:00
Ballum	Ballum	Mus 127	0	0
Ballum	Kenya	Njenga	0	0
Bataviae	Bataviae	Swart	0	0
Canicola	Canicola	Hond Utrecht IV	0	0
Canicola	Schueffneri	Vleermuis 90 C	0	0
Celledoni	Celledoni	Celledoni	0	0
Cynopteri	Cynopteri	3522 C	0	0
Djasiman	Djasiman	Djasiman	0	0
Grippotyphosa	Grippotyphosa	Moskva V	0	0
Grippotyphosa	Huanuco	M 4	0	0
Hebdomadis	Hebdomadis	Hebdomadis	01:20:00	01:40:00
Hebdomadis	Worsfoldi	Worsfold	0	0
Icterohaemorrhagiae	Copenhageni	Wijnberg	0	0
Icterohaemorrhagiae	Icterohaemorrhagiae	RGA	0	0
Javanica	Poi	Poi	0	0
Louisiana	Louisiana	LSU 1945	0	0
Manhao	Manhao	L 60	0	0
Mini	Mini	Sari	>1:1280	>1:1280
Panama	Panama	CZ 214 K	0	0
Pomona	Pomona	Pomona	0	0
Pyrogenes	Pyrogenes	Salinem	0	0
Sarmin	Rio	Rr 5	0	0
Sarmin	Weaveri	CZ 390	0	0
Sejroe	Hardjo type Prajitno	Hardjoprajitno	0	0
Sejroe	Saxkoebing	Mus 24	01:20:00	01:40:00
Shermani	Shermani	1342 K	0	01:20:00
Tarassovi	Bakeri	LT 79	0	0
Tarassovi	Mogden	Compton	0	0
Tarassovi	Rama	316	0	0
Tarassovi	Tarassovi	Perepelitsin	0	0
Semaranga	Patoc	Patoc I	0	0
Hurstbridge	Hurstbridge	BUT 6	0	0
Leptonema	Illini	3055	0	0
Ranarum	Ranarum	ICF	0	0
Genomospecies 1	Sichuan	79601	0	0
Difco contaminant			0	0
Lyme	Lyme	10	0	0

## Sheet: Table S2
Supplementary 1, Table S2. RAST subsystem features of Leptospira weilii strains CUDO6 and CUD13
Subsystem feature	CUDO6	CUD13
Amino Acids and Derivatives	183	183
Protein Metabolism	132	128
Cofactors, Vitamins, Prosthetic Groups, Pigments	115	115
Carbohydrates	78	78
Motility and Chemotaxis	73	73
Respiration	63	62
DNA Metabolism	56	57
Stress Response	54	54
Regulation and Cell signaling	36	35
Fatty Acids, Lipids, and Isoprenoids	33	33
Virulence, Disease and Defense	33	33
Nucleosides and Nucleotides	32	32
RNA Metabolism	27	27
Cell Wall and Capsule	24	24
Miscellaneous	13	13
Phosphorus Metabolism	13	13
Membrane Transport	9	9
Nitrogen Metabolism	7	7
Sulfur Metabolism	5	5
Potassium metabolism	5	5
Cell Division and Cell Cycle	4	4
Secondary Metabolism	4	4
Metabolism of Aromatic Compounds	3	3
Dormancy and Sporulation	2	2
Iron acquisition and metabolism	1	1
Phages, Prophages, Transposable elements, Plasmids	1	1
Photosynthesis	0	0
Total	1006	1001

## Sheet: Table S3
Supplementary data 1, Table S3. Summary of incomplete prophage presented in Leptospira weilii strains CUDO6 and CUD13 genome
Strains	Most common phage name	Score	Length (kbp)	CDSs	GC%	Completeness	Region position
CUDO6
CI	PHAGE_Pseudo_JBD18_NC_027986	10	7.4	14	40.48	Incomplete	283011-290480
	PHAGE_Stx2_c_1717_NC_011357	100	16	18	41.81	Intact	2537104-2553154
	PHAGE_Sphing_PAU_NC_019521	20	10.5	10	37.49	Incomplete	2813601-2824181
CII	PHAGE_Burkho_phiE255_NC_009237	20	12	15	42.29	Incomplete	3065273-3077293
pDO6	PHAGE_Pseudo_JBD18_NC_027986	10	7.4	14	40.48	Incomplete	82280-89749
	PHAGE_Entero_BP_4795_NC_004813	130	21.8	37	36.8	Intact	57341-79160
CUD13
CI	PHAGE_Pseudo_JBD18_NC_027986	10	7.4	14	40.48	Incomplete	283927-291396
	PHAGE_Burkho_phiE255_NC_009237	20	12	15	42.32	Incomplete	1519667-1531687
	PHAGE_Sphing_PAU_NC_019521	20	10.5	10	37.49	Incomplete	1772750-1783330
	PHAGE_Stx2_c_1717_NC_011357	100	10.2	18	40.99	Intact	2043204-2053480
CII	Not found
pD13	PHAGE_Entero_BP_4795_NC_004813	130	21.8	37	36.8	Intact	63592-85411

## Sheet: Table S4
Supplemetary data 1, Table S4. Common spacer shared in Leptospira weilii strains CUDO6 and CUD13 genomes
Spacers	Protospacer matched	Score
spacer-1
CTTTTGTAAACCTGTGACATCAAAACAAACTC
spacer-2
ATCTACACCGGCGAGGACGCTTTTGATGAGAA	Leptospira phage LalZ_80412, complete genome.(KF114876)	24
spacer-3
ACCTGTTGCATCACATAAGAATCAACTCCAAA	L. interrogans serovar Lai str. 56601 plasmid Laicp, complete sequence(NC_025151.1)	28
spacer-4
TTTGGATAATGGATATTCTTGAAGATGTCTCT
spacer-5
TTCTGAAGTTGGTATTTGAATGATTTTATTTC
spacer-6
GCCTTTATGCGTAGCGGACACACCACGATGC
spacer-7
AGCCGCAACTTGATATTACACTCGATCAATTT
spacer-8
TCTGTTGTCCCTATTTCGATTGAATTTTACAC
spacer-9
TGTAAGATAACTTAGTTTCATATTCAATCCTC
spacer-10
TTCATAAATAGGAAATCTTTCATTCAAGGAAC
spacer-11
TCAGATTATTCCAATATATTGTTTGTAGCTAA
spacer-12
GTTTTCAAAATGCTCACACGTGAGCATTTTG
spacer-13
TTAGTCCGTATGAAAATAGACTACTCAGACTC	L. weilii str. UI 14631 genome	32
spacer-14
AAATTTGAGAAAATAAAATCACTCTCTCATAA
spacer-15	L. interrogans serovar Linhai str. 56609 plasmid lcp1, complete sequence(NZ_CP006725.1)	22
AATATCTAATCTGTTTATTTGGCGGAATGTCC
spacer-16
TTTAACTCACAAATCAAATATGGGAGATGAAA
spacer-17
ATTTTTTAAACAAAATAATAGTTTGCCTCATT	Raoultii strain Khabarovsk plasmid pRra2, complete sequence(NZ_CP010971.1)	24
spacer-18
GTTGAGGAGTTTGAACTTTAATAATGCCATCTC
spacer-19
GTATTCACATTTTTTAATTCAGCTGTTCTTC
spacer-20
AAAACCATGTAATAATTATTTTTGATAATTAT	Salmonella phage Vi01 complete sequence.(FQ312032)	22
spacer-21
TATCTCTTCAGCTTTCCAGTAAGAAGCCTGCG
spacer-22
GCCGAAGGGTTCGACAAACATATCGAAACTTT	L. mayottensis strain MDI272 plasmid p_Lmay_MDI272_tenre, complete sequence(NZ_CP030149.1)	26
spacer-23
TGCGGATTATCGTAAGGCAGCTCAAATGATGT	L. interrogans str. UT126 genome	24
spacer-24
TTCAAAATCTTTAGGAAGCAATGTAATAATTC
spacer-25
AAAAATACTGAATCCGAATGTAATCGCTGTAT	L. weilii str. 2006001853 genome	32
spacer-26
TTTGACGATTGAACGGATCGAGGCCGGTGCG	L. kirschneri str. 200801774	25
spacer-27
CTTCTCCCAATGCGATTGAACGCACTTTCTCC
spacer-28
TAGCGTAGATCAGCACGAATGCCACCTGTTCT
spacer-29
TCTATTCCAAATGAAAGAATGGTTCATATAC
spacer-30
ATGCGGGATTGACTTTAGAAGATGCCGCTAAA
spacer-31
TTGCGGTATCGATAAAGCAATTGTAAATCGTT

## Sheet: Table S5
Supplemetary data 1, Table S5. Predicted virulence-associated proteins in Leptospira weilii strain CUDO6
Locus_tag	Annotated proteins in VFDB database	Amino acid length	Identity	E-value
FHG67_RS00050	VFG038763(gb|YP_857330) (fleQ/flrC) FleQ protein [ND (AI144)] [Aeromonas hydrophila subsp. hydrophila ATCC 7966]	95	25.648	5.36e-22
FHG67_RS00080	VFG038839(gb|YP_858598) (flmH) short chain dehydrogenase/reductase family oxidoreductase [Polar flagella (CVF786)] [Aeromonas hydrophila subsp. hydrophila ATCC 7966]	96	37.097	2.93e-47
FHG67_RS00110	VFG006562(gb|NP_207150) (fliG) flagellar motor switch protein G [Pse5Ac7Ac (AI150)] [Helicobacter pylori 26695]	99	38.372	3.76e-76
FHG67_RS00185	VFG001971(gb|NP_282584) (kpsF) D-arabinose 5-phosphate isomerase [Capsule (VF0323)] [Campylobacter jejuni subsp. jejuni NCTC 11168]	97	42.812	3.01e-77
FHG67_RS00205	VFG002529(gb|YP_109900) (tsr) methyl-accepting chemotaxis protein I [Flagella (VF0430)] [Burkholderia pseudomallei K96243]	46	26.022	1.66e-19
FHG67_RS00215	VFG000430(gb|NP_458739) (tviC) Vi polysaccharide biosynthesis protein, epimerase TviC [Vi antigen (VF0101)] [Salmonella enterica subsp. enterica serovar Typhi str. CT18]	98	27.879	1.83e-29
FHG67_RS00240	VFG038176(gb|YP_001847748) (ompA) outer membrane protein OmpA [OmpA (VF0464)] [Acinetobacter baumannii ACICU]	15	38.462	4.82e-13
FHG67_RS00265	VFG048896(gb|YP_002920359.1) (wcsT) galactoside O-acetyltransferase [Capsule (VF0560)] [Klebsiella pneumoniae subsp. pneumoniae NTUH-K2044]	57	30.968	9.75e-10
FHG67_RS00450	VFG016058(gb|NP_251114) (pvdL) peptide synthase PvdL [pyoverdine (IA001)] [Pseudomonas aeruginosa PAO1]	12	36.782	1.89e-08
FHG67_RS00470	VFG044323(gb|YP_002920243) (ybtS) yersiniabactin biosynthesis salicylate synthase YbtS [Ybt (VF0564)] [Klebsiella pneumoniae subsp. pneumoniae NTUH-K2044]	45	26.217	1.21e-20
FHG67_RS00590	VFG038759(gb|YP_857329) (fleS/flrB) two-component sensor kinase [ND (AI144)] [Aeromonas hydrophila subsp. hydrophila ATCC 7966]	20	35.652	2.82e-15
FHG67_RS00655	VFG038763(gb|YP_857330) (fleQ/flrC) FleQ protein [ND (AI144)] [Aeromonas hydrophila subsp. hydrophila ATCC 7966]	47	44.97	3.99e-90
FHG67_RS00670	VFG000841(gb|YP_325609) (hlyB) hemolysin transport protein [Hemolysin (VF0207)] [Escherichia coli O157:H7 str. EDL933]	85	32.514	8.78e-71
FHG67_RS00830	VFG000320(gb|NP_208266) (kdtB) lipopolysaccharide core biosynthesis protein [LPS (VF0056)] [Helicobacter pylori 26695]	96	41.401	4.74e-38
FHG67_RS00875	VFG001713(gb|NP_755457) (papX) PapX protein regulates flagellum synthesis to repress motility [P fimbriae (CVF425)] [Escherichia coli CFT073]	50	40.789	2.42e-08
FHG67_RS00890	VFG042869(gb|YP_095575) (pilF) type IV pilus biogenesis protein PilF [type IV pili (AI111)] [Legionella pneumophila subsp. pneumophila str. Philadelphia 1]	60	27.586	8.95e-07
FHG67_RS00940	VFG013265(gb|NP_438428) (orfM) deoxyribonucleotide triphosphate pyrophosphatase [LOS (CVF494)] [Haemophilus influenzae Rd KW20]	94	42.932	2.46e-41
FHG67_RS00945	VFG001206(gb|NP_273675) (fbpC) iron(III) ABC transporter, ATP-binding protein [FbpABC (VF0272)] [Neisseria meningitidis MC58]	33	28.358	3.54e-15
FHG67_RS00950	VFG038176(gb|YP_001847748) (ompA) outer membrane protein OmpA [OmpA (VF0464)] [Acinetobacter baumannii ACICU]	17	37.5	4.43e-16
FHG67_RS00995	VFG001206(gb|NP_273675) (fbpC) iron(III) ABC transporter, ATP-binding protein [FbpABC (VF0272)] [Neisseria meningitidis MC58]	68	33.036	2.18e-32
FHG67_RS01040	VFG038176(gb|YP_001847748) (ompA) outer membrane protein OmpA [OmpA (VF0464)] [Acinetobacter baumannii ACICU]	71	30.496	2.92e-07
FHG67_RS01055	VFG005767(gb|NP_687682) (cylG) 3-ketoacyl-ACP-reductase CylG [Beta-hemolysin/cytolysin (CVF171)] [Streptococcus agalactiae 2603V/R]	71	27.419	2.12e-14
FHG67_RS01085	VFG002224(gb|NP_540321) (wbkA) mannosyltransferase [LPS (VF0367)] [Brucella melitensis bv. 1 str. 16M]	41	27.397	1.01e-12
FHG67_RS01090	VFG002559(gb|YP_109395) (wcbH) glycosyl transferase [Capsule I (VF0436)] [Burkholderia pseudomallei K96243]	46	23.926	4.27e-10
FHG67_RS01100	VFG002556(gb|YP_109392) (wcbK) GDP sugar epimerase/dehydratase [Capsule I (VF0436)] [Burkholderia pseudomallei K96243]	99	33.231	1.09e-45
FHG67_RS01120	VFG000121(gb|NP_249453) (algU) alginate biosynthesis protein AlgZ/FimS [Alginate (VF0091)] [Pseudomonas aeruginosa PAO1]	96	28.902	2.64e-12
FHG67_RS01190	VFG009810(gb|NP_215272) (phoR) Possible two component system response sensor kinase membrane associated PhoR [PhoP/R (CVF331)] [Mycobacterium tuberculosis H37Rv]	48	30.172	6.12e-26
FHG67_RS01195	VFG038219(gb|YP_001845364) (bfmR) biofilm-controlling response regulator [BfmRS (VF0463)] [Acinetobacter baumannii ACICU]	94	37.054	9.06e-49
FHG67_RS01210	VFG000121(gb|NP_249453) (algU) alginate biosynthesis protein AlgZ/FimS [Alginate (VF0091)] [Pseudomonas aeruginosa PAO1]	90	28.804	1.95e-25
FHG67_RS01635	VFG043394(gb|YP_002343725) (cheA) chemotaxis histidine kinase [Pse5Ac7Ac, Pse5Ac7Am, Pse8OAc, Pse5Am7AcGlnAc (AI151)] [Campylobacter jejuni subsp. jejuni NCTC 11168]	55	30.986	3.42e-10
FHG67_RS01685	VFG039413(gb|YP_001424395) (ankH) Coxiella Dot/Icm type IVB secretion system translocated effector [Dot/Icm (SS051)] [Coxiella burnetii Dugway 5J108-111]	72	23.103	1.24e-08
FHG67_RS01705	VFG005767(gb|NP_687682) (cylG) 3-ketoacyl-ACP-reductase CylG [Beta-hemolysin/cytolysin (CVF171)] [Streptococcus agalactiae 2603V/R]	70	26.562	9.44e-16
FHG67_RS01730	VFG001089(gb|NP_464364) (hpt) hexose phosphate transport protein [Hpt (VF0264)] [Listeria monocytogenes EGD-e]	88	28	2.37e-36
FHG67_RS01780	VFG049133(gb|YP_002918166.1) (acrA) acriflavine resistance protein A [AcrAB (VF0568)] [Klebsiella pneumoniae subsp. pneumoniae NTUH-K2044]	22	31.818	2.51e-09
FHG67_RS01785	VFG037720(gb|YP_001847164) (adeG) cation/multidrug efflux pump [AdeFGH efflux pump (VF0504)] [Acinetobacter baumannii ACICU]	99	22.65	1.28e-67
FHG67_RS01790	VFG036992(gb|NP_274718) (mtrD) multiple transferable resistance system protein MtrD [MtrCDE (VF0451)] [Neisseria meningitidis MC58]	81	19.408	3.77e-35
FHG67_RS01930	VFG038722(gb|YP_855928) (AHA_1389) CobQ/CobB/MinD/ParA family protein [Polar flagella (CVF786)] [Aeromonas hydrophila subsp. hydrophila ATCC 7966]	59	31.395	5.6e-16
FHG67_RS01935	VFG048229(gb|YP_002921134.1) (fimB) tyrosine recombinase [Type I fimbriae (VF0566)] [Klebsiella pneumoniae subsp. pneumoniae NTUH-K2044]	52	25.907	9.31e-20
FHG67_RS02015	VFG038722(gb|YP_855928) (AHA_1389) CobQ/CobB/MinD/ParA family protein [Polar flagella (CVF786)] [Aeromonas hydrophila subsp. hydrophila ATCC 7966]	59	31.395	5.6e-16
FHG67_RS02020	VFG048229(gb|YP_002921134.1) (fimB) tyrosine recombinase [Type I fimbriae (VF0566)] [Klebsiella pneumoniae subsp. pneumoniae NTUH-K2044]	52	25.907	9.31e-20
FHG67_RS02105	VFG038722(gb|YP_855928) (AHA_1389) CobQ/CobB/MinD/ParA family protein [Polar flagella (CVF786)] [Aeromonas hydrophila subsp. hydrophila ATCC 7966]	84	25.571	1.26e-15
FHG67_RS02110	VFG048229(gb|YP_002921134.1) (fimB) tyrosine recombinase [Type I fimbriae (VF0566)] [Klebsiella pneumoniae subsp. pneumoniae NTUH-K2044]	52	25.275	2.55e-14
FHG67_RS02185	VFG001372(gb|NP_344886) (cps4H) capsular polysaccharide biosynthesis protein Cps4H [Capsule (VF0144)] [Streptococcus pneumoniae TIGR4]	37	33.094	9.97e-16
FHG67_RS02325	VFG038831(gb|YP_857806) (pomB2) flagellar motor protein MotB [Polar flagella (CVF786)] [Aeromonas hydrophila subsp. hydrophila ATCC 7966]	62	38.298	8.82e-25
FHG67_RS02335	VFG001284(gb|NP_647402) (icaR) ica operon transcriptional regulator IcaR [Intercellular adhesion proteins (VF0014)] [Staphylococcus aureus subsp. aureus MW2]	26	31.373	4.94e-08
FHG67_RS02340	VFG042972(gb|YP_002742499) (sipA) signal peptidase I [PI-2 (VF0530)] [Streptococcus pneumoniae Taiwan19F-14]	83	26.946	3.15e-11
FHG67_RS02405	VFG001206(gb|NP_273675) (fbpC) iron(III) ABC transporter, ATP-binding protein [FbpABC (VF0272)] [Neisseria meningitidis MC58]	85	34.081	1.34e-34
FHG67_RS02445	VFG014707(gb|NP_250151) (motC) flagellar motor protein [Deoxyhexose linking sugar, 209 Da capping structure (AI138)] [Pseudomonas aeruginosa PAO1]	98	35.124	8.9e-48
FHG67_RS02475	VFG038234(gb|YP_001845365) (bfmS) signal transduction histidine kinase [BfmRS (VF0463)] [Acinetobacter baumannii ACICU]	37	29.577	8.76e-19
FHG67_RS02525	VFG013248(gb|NP_438233) (msbA) lipid transporter ATP-binding/permease [LOS (CVF494)] [Haemophilus influenzae Rd KW20]	82	36.609	3.1e-109
FHG67_RS02530	VFG013242(gb|NP_438232) (lpxK) tetraacyldisaccharide 4'-kinase [LOS (CVF494)] [Haemophilus influenzae Rd KW20]	79	32.847	3.25e-35
FHG67_RS02595	VFG038759(gb|YP_857329) (fleS/flrB) two-component sensor kinase [ND (AI144)] [Aeromonas hydrophila subsp. hydrophila ATCC 7966]	12	37	3.31e-11
FHG67_RS02625	VFG013436(gb|NP_439676) (htrB) lipid A biosynthesis lauroyl acyltransferase [LOS (CVF494)] [Haemophilus influenzae Rd KW20]	96	23.649	1.5e-15
FHG67_RS02650	VFG045340(gb|NP_539653) (ricA) Rab2 interacting conserved protein A [RicA (VF0414)] [Brucella melitensis bv. 1 str. 16M]	83	33.758	1.93e-26
FHG67_RS02795	VFG038234(gb|YP_001845365) (bfmS) signal transduction histidine kinase [BfmRS (VF0463)] [Acinetobacter baumannii ACICU]	60	24.017	9.58e-14
FHG67_RS02805	VFG049144(gb|YP_002918165.1) (acrB) acriflavine resistance protein B [AcrAB (VF0568)] [Klebsiella pneumoniae subsp. pneumoniae NTUH-K2044]	93	26.395	6.63e-103
FHG67_RS02810	VFG002226(gb|NP_540331) (per) perosamine synthetase [LPS (VF0367)] [Brucella melitensis bv. 1 str. 16M]	95	27.198	9.58e-32
FHG67_RS02815	VFG001310(gb|NP_644952) (cap8N) capsular polysaccharide synthesis enzyme Cap8N [Capsule (VF0003)] [Staphylococcus aureus subsp. aureus MW2]	53	28.962	1.11e-10
FHG67_RS02825	VFG037720(gb|YP_001847164) (adeG) cation/multidrug efflux pump [AdeFGH efflux pump (VF0504)] [Acinetobacter baumannii ACICU]	99	28.341	1.15e-119
FHG67_RS02835	VFG049152(gb|YP_006635478.1) (clbF) colibactin biosynthesis dehydrogenase ClbF [Colibactin (VF0573)] [Klebsiella pneumoniae subsp. pneumoniae 1084]	60	25.915	2.9e-24
FHG67_RS02865	VFG038234(gb|YP_001845365) (bfmS) signal transduction histidine kinase [BfmRS (VF0463)] [Acinetobacter baumannii ACICU]	27	28	9.62e-18
FHG67_RS02900	VFG001798(gb|YP_186826) (hlb) beta-hemolysin [<beta>-hemolysin (VF0002)] [Staphylococcus aureus subsp. aureus COL]	54	37.459	1.4e-59
FHG67_RS02975	VFG000700(gb|AAP42192) (bsc1) bifunctional; ribulose 5-phosphate reductase; CDP-ribitol pyrophosphorylase [Capsule (VF0043)] [Haemophilus influenzae str. 1007]	94	28.947	6.61e-19
FHG67_RS03010	VFG000119(gb|NP_253948) (algR) alginate biosynthesis regulatory protein AlgR [Alginate (VF0091)] [Pseudomonas aeruginosa PAO1]	26	35.484	1.92e-11
FHG67_RS03035	VFG001798(gb|YP_186826) (hlb) beta-hemolysin [<beta>-hemolysin (VF0002)] [Staphylococcus aureus subsp. aureus COL]	46	46.557	9.23e-85
FHG67_RS03050	VFG000121(gb|NP_249453) (algU) alginate biosynthesis protein AlgZ/FimS [Alginate (VF0091)] [Pseudomonas aeruginosa PAO1]	46	33.333	1.15e-07
FHG67_RS03225	VFG002184(gb|NP_816135) (cpsG) MurB family protein [Capsule (VF0361)] [Enterococcus faecalis V583]	97	26.688	4.41e-25
FHG67_RS03315	VFG038900(gb|YP_857314) (hlyA) Hemolysin A [Hemolysin, HlyA (CVF792)] [Aeromonas hydrophila subsp. hydrophila ATCC 7966]	97	23.488	5.75e-33
FHG67_RS03385	VFG002361(gb|YP_001007253) (galE) UDP-glucose 4-epimerase [O-antigen (VF0392)] [Yersinia enterocolitica subsp. enterocolitica 8081]	99	41.692	7.7e-72
FHG67_RS03390	VFG013390(gb|NP_439219) (lpxA) UDP-N-acetylglucosamine acyltransferase [LOS (CVF494)] [Haemophilus influenzae Rd KW20]	98	41.016	7.73e-64
FHG67_RS03400	VFG002225(gb|NP_540330) (gmd) GDP-mannose 4,6-dehydratase [LPS (VF0367)] [Brucella melitensis bv. 1 str. 16M]	98	61.471	2.49e-154
FHG67_RS03405	VFG049159(gb|YP_006635485.1) (clbM) precolibactin export MATE transporter ClbM [Colibactin (VF0573)] [Klebsiella pneumoniae subsp. pneumoniae 1084]	72	23.214	4.86e-10
FHG67_RS03500	VFG049148(gb|YP_006635474.1) (clbB) colibactin hybrid non-ribosomal peptide synthetase/type I polyketide synthase ClbB [Colibactin (VF0573)] [Klebsiella pneumoniae subsp. pneumoniae 1084]	51	26.047	4.07e-08
FHG67_RS03515	VFG038853(gb|YP_858604) (maf-2) Maf-2 [Polar flagella (CVF786)] [Aeromonas hydrophila subsp. hydrophila ATCC 7966]	62	23.832	1.91e-20
FHG67_RS03545	VFG000038(gb|NP_878995) (bplA) probable oxidoreductase [LPS (VF0033)] [Bordetella pertussis Tohama I]	66	24.473	2.35e-12
FHG67_RS03645	VFG000430(gb|NP_458739) (tviC) Vi polysaccharide biosynthesis protein, epimerase TviC [Vi antigen (VF0101)] [Salmonella enterica subsp. enterica serovar Typhi str. CT18]	96	24.425	1.34e-18
FHG67_RS03650	VFG013346(gb|NP_438972) (galU) glucosephosphate uridylyltransferase [LOS (CVF494)] [Haemophilus influenzae Rd KW20]	52	26.552	4.37e-09
FHG67_RS03690	VFG000121(gb|NP_249453) (algU) alginate biosynthesis protein AlgZ/FimS [Alginate (VF0091)] [Pseudomonas aeruginosa PAO1]	76	30.714	4.09e-11
FHG67_RS03705	VFG001247(gb|NP_249785) (fliD) flagellar capping protein FliD [Flagella (VF0273)] [Pseudomonas aeruginosa PAO1]	40	28.405	2.69e-15
FHG67_RS03910	VFG005776(gb|NP_687685) (cylA) ABC (ATP-binding cassette) transporter CylA [Beta-hemolysin/cytolysin (CVF171)] [Streptococcus agalactiae 2603V/R]	88	30.797	1.02e-23
FHG67_RS03935	VFG038839(gb|YP_858598) (flmH) short chain dehydrogenase/reductase family oxidoreductase [Polar flagella (CVF786)] [Aeromonas hydrophila subsp. hydrophila ATCC 7966]	76	29.148	1.26e-18
FHG67_RS03945	VFG000344(gb|NP_438273) (hitC) iron(III) ABC transporter, ATP-binding protein [HitABC (VF0268)] [Haemophilus influenzae Rd KW20]	70	33.04	1.64e-32
FHG67_RS03995	VFG044172(gb|NP_756180) (chuV) ATP-binding hydrophilic protein ChuV [Chu (VF0227)] [Escherichia coli CFT073]	90	28.39	8.5e-21
FHG67_RS04010	VFG010862(gb|YP_094891) (ccmA) ABC transporter involved in cytochrome c biogenesis, ATPase component CcmA [Cytochrome c muturation (ccm) locus (CVF358)] [Legionella pneumophila subsp. pneumophila str. Philadelphia 1]	85	32.292	4.51e-21
FHG67_RS04025	VFG001386(gb|NP_215271) (phoP) Possible two component system response transcriptional positive regulator PhoP [PhoP (VF0286)] [Mycobacterium tuberculosis H37Rv]	31	36.134	6.53e-15
FHG67_RS04240	VFG002482(gb|YP_111511) (tagAB-5) Type VI secretion system protein [T6SS-1 (VF0429)] [Burkholderia pseudomallei K96243]	32	35.789	5.42e-09
FHG67_RS04250	VFG000515(gb|NP_460380) (ssaN) type III secretion system ATPase SsaN [TTSS(SPI-2 encode) (VF0321)] [Salmonella enterica subsp. enterica serovar Typhimurium str. LT2]	57	27.972	9.53e-20
FHG67_RS04260	VFG001965(gb|NP_282578) (Cj1437c) aminotransferase [Capsule (VF0323)] [Campylobacter jejuni subsp. jejuni NCTC 11168]	56	24.675	2.62e-08
FHG67_RS04340	VFG000075(gb|NP_463962) (inlA) Internalin A [InlA (VF0069)] [Listeria monocytogenes EGD-e]	25	36.719	1.63e-14
FHG67_RS04425	VFG043391(gb|NP_208374) (pdxA) 4-hydroxythreonine-4-phosphate dehydrogenase [Pse5Ac7Ac (AI150)] [Helicobacter pylori 26695]	98	31.646	9.14e-33
FHG67_RS04435	VFG006171(gb|NP_274328) (pilW) type IV fimbrial biogenesis and twitching motility protein PilW [Type IV pili (CVF189)] [Neisseria meningitidis MC58]	84	26.95	2.11e-08
FHG67_RS04460	VFG014950(gb|NP_249457) (mucD) serine protease MucD precursor [Alginate regulation (CVF523)] [Pseudomonas aeruginosa PAO1]	35	36.364	3.85e-08
FHG67_RS04465	VFG014950(gb|NP_249457) (mucD) serine protease MucD precursor [Alginate regulation (CVF523)] [Pseudomonas aeruginosa PAO1]	85	39.359	7.62e-72
FHG67_RS04500	VFG002440(gb|YP_111528) (bprB) two-component response regulator [Bsa T3SS (VF0428)] [Burkholderia pseudomallei K96243]	76	29.213	4.11e-22
FHG67_RS04540	VFG001444(gb|AAG10151) (aslA) putative arylsulfatase [AslA (VF0238)] [Escherichia coli O18:K1:H7 str. RS218]	41	23.848	3.73e-08
FHG67_RS04600	VFG043209(gb|YP_001006778) (cheD) methyl-accepting chemotaxis protein CheD [peritrichous flagella (AI145)] [Yersinia enterocolitica subsp. enterocolitica 8081]	48	30.112	8.49e-26
FHG67_RS04705	VFG017856(gb|YP_001007658) (pilW) type IV fimbrial biogenesis protein PilW [Type IV pili (CVF049)] [Yersinia enterocolitica subsp. enterocolitica 8081]	95	26.266	7.9e-22
FHG67_RS04710	VFG045467(gb|YP_107884) (cdpA) cyclic di-GMP phosphodiesterase [CdpA (VF0432)] [Burkholderia pseudomallei K96243]	54	26.316	4.51e-14
FHG67_RS04765	VFG013315(gb|NP_438813) (lgtF) beta-1,4-glucosyltransferase [LOS (CVF494)] [Haemophilus influenzae Rd KW20]	95	35.772	1.14e-46
FHG67_RS04790	VFG000164(gb|NP_252911) (fptA) Fe(III)-pyochelin receptor precursor [Pyochelin (VF0095)] [Pseudomonas aeruginosa PAO1]	71	21.488	9.09e-10
FHG67_RS04795	VFG000071(gb|NP_463734) (mpl) Zinc metalloproteinase precursor [Mpl (VF0065)] [Listeria monocytogenes EGD-e]	63	24.806	7.03e-20
FHG67_RS04840	VFG001237(gb|NP_249770) (flgD) flagellar basal-body rod modification protein FlgD [Flagella (VF0273)] [Pseudomonas aeruginosa PAO1]	24	46.479	1.63e-11
FHG67_RS04845	VFG002511(gb|YP_106900) (flgE) flagellar hook protein FlgE [Flagella (VF0430)] [Burkholderia pseudomallei K96243]	98	31.624	4.1e-53
FHG67_RS04935	VFG000075(gb|NP_463962) (inlA) Internalin A [InlA (VF0069)] [Listeria monocytogenes EGD-e]	47	30.288	3.97e-11
FHG67_RS05320	VFG001826(gb|NP_217099) (relA) Probable GTP pyrophosphokinase RelA (ATP:GTP 3'-pyrophosphotransferase) (PPGPP synthetase I) ((P)PPGPP synthetase) (GTP diphosphokinase) [RelA (VF0287)] [Mycobacterium tuberculosis H37Rv]	97	39.335	0
FHG67_RS05370	VFG045330(gb|YP_095353) (lbtC) LbtC inner membrane protein required for import of Legiobactin [Legiobactin (VF0291)] [Legionella pneumophila subsp. pneumophila str. Philadelphia 1]	23	32.632	9.65e-07
FHG67_RS05410	VFG032992(gb|NP_464816) (oatA) peptidoglycan O-acetyltransferase [OatA (VF0441)] [Listeria monocytogenes EGD-e]	82	29.769	2.5e-22
FHG67_RS05535	VFG011519(gb|NP_540343) (wbpL) undecaprenyl-phosphate alpha-N-acetylglucosaminyltransferase [LPS (CVF383)] [Brucella melitensis bv. 1 str. 16M]	69	28.685	1.86e-17
FHG67_RS05600	VFG002190(gb|NP_816141) (cpsA) undecaprenyl diphosphate synthase [Capsule (VF0361)] [Enterococcus faecalis V583]	97	41.597	1.2e-64
FHG67_RS05605	VFG002189(gb|NP_816140) (cpsB) phosphatidate cytidylyltransferase [Capsule (VF0361)] [Enterococcus faecalis V583]	44	38.06	3.54e-21
FHG67_RS05615	VFG015000(gb|NP_252339) (mucP) metalloprotease protease [Alginate regulation (CVF523)] [Pseudomonas aeruginosa PAO1]	35	31.776	1.75e-19
FHG67_RS05685	VFG005767(gb|NP_687682) (cylG) 3-ketoacyl-ACP-reductase CylG [Beta-hemolysin/cytolysin (CVF171)] [Streptococcus agalactiae 2603V/R]	94	39.918	1.32e-56
FHG67_RS05695	VFG011430(gb|NP_540392) (acpXL) acyl carrier protein [LPS (CVF383)] [Brucella melitensis bv. 1 str. 16M]	95	68.493	1.39e-28
FHG67_RS05720	VFG006717(gb|NP_465159) (lap) Listeria adhesion protein Lap [Lap (VF0444)] [Listeria monocytogenes EGD-e]	98	23.245	1.3e-16
FHG67_RS05780	VFG001206(gb|NP_273675) (fbpC) iron(III) ABC transporter, ATP-binding protein [FbpABC (VF0272)] [Neisseria meningitidis MC58]	87	36.453	9.31e-32
FHG67_RS05865	VFG001342(gb|NP_688174) (cpsO) glycosyl transferase CpsO(V) [Capsule (VF0274)] [Streptococcus agalactiae 2603V/R]	34	43.564	1.63e-19
FHG67_RS05875	VFG046167(gb|YP_002305089.1) (CbuK_0688) Coxiella Dot/Icm type IVB secretion system translocated effector [T4SS effectors (CVF803)] [Coxiella burnetii CbuK_Q154]	43	42.683	4.25e-25
FHG67_RS05880	VFG046167(gb|YP_002305089.1) (CbuK_0688) Coxiella Dot/Icm type IVB secretion system translocated effector [T4SS effectors (CVF803)] [Coxiella burnetii CbuK_Q154]	76	44.231	3.33e-26
FHG67_RS05885	VFG046167(gb|YP_002305089.1) (CbuK_0688) Coxiella Dot/Icm type IVB secretion system translocated effector [T4SS effectors (CVF803)] [Coxiella burnetii CbuK_Q154]	30	46.667	2.39e-22
FHG67_RS05940	VFG001214(gb|NP_253237) (pilR) two-component response regulator PilR [Type IV pili (VF0082)] [Pseudomonas aeruginosa PAO1]	36	38.532	1.23e-16
FHG67_RS05950	VFG014950(gb|NP_249457) (mucD) serine protease MucD precursor [Alginate regulation (CVF523)] [Pseudomonas aeruginosa PAO1]	58	24.915	9.63e-08
FHG67_RS06090	VFG000075(gb|NP_463962) (inlA) Internalin A [InlA (VF0069)] [Listeria monocytogenes EGD-e]	45	29.26	4.7e-18
FHG67_RS06260	VFG000075(gb|NP_463962) (inlA) Internalin A [InlA (VF0069)] [Listeria monocytogenes EGD-e]	54	41.121	3.98e-16
FHG67_RS06305	VFG000143(gb|NP_253699) (waaF) heptosyltransferase I [LPS (VF0085)] [Pseudomonas aeruginosa PAO1]	97	26.801	1.07e-21
FHG67_RS06315	VFG038219(gb|YP_001845364) (bfmR) biofilm-controlling response regulator [BfmRS (VF0463)] [Acinetobacter baumannii ACICU]	96	32.883	1.19e-33
FHG67_RS06320	VFG009810(gb|NP_215272) (phoR) Possible two component system response sensor kinase membrane associated PhoR [PhoP/R (CVF331)] [Mycobacterium tuberculosis H37Rv]	28	28.897	3.73e-16
FHG67_RS06330	VFG000574(gb|NP_462662) (mgtB) Mg2+ transport protein [MgtBC (VF0106)] [Salmonella enterica subsp. enterica serovar Typhimurium str. LT2]	66	25.046	6.18e-20
FHG67_RS06345	VFG043392(gb|YP_002343698) (eptC) phosphoethanolamine transferase [Pse5Ac7Ac, Pse5Ac7Am, Pse8OAc, Pse5Am7AcGlnAc (AI151)] [Campylobacter jejuni subsp. jejuni NCTC 11168]	38	26.054	1.84e-12
FHG67_RS06375	VFG000344(gb|NP_438273) (hitC) iron(III) ABC transporter, ATP-binding protein [HitABC (VF0268)] [Haemophilus influenzae Rd KW20]	93	29.565	6.09e-26
FHG67_RS06385	VFG001882(gb|YP_095553) (pilD) type IV pilus prepilin peptidase PilD [Type IV pili (VF0155)] [Legionella pneumophila subsp. pneumophila str. Philadelphia 1]	75	26.201	5.02e-09
FHG67_RS06610	VFG048229(gb|YP_002921134.1) (fimB) tyrosine recombinase [Type I fimbriae (VF0566)] [Klebsiella pneumoniae subsp. pneumoniae NTUH-K2044]	50	22.527	2.03e-10
FHG67_RS06615	VFG038722(gb|YP_855928) (AHA_1389) CobQ/CobB/MinD/ParA family protein [Polar flagella (CVF786)] [Aeromonas hydrophila subsp. hydrophila ATCC 7966]	84	25.792	2.62e-16
FHG67_RS06695	VFG048229(gb|YP_002921134.1) (fimB) tyrosine recombinase [Type I fimbriae (VF0566)] [Klebsiella pneumoniae subsp. pneumoniae NTUH-K2044]	15	23.913	2.32e-10
FHG67_RS06700	VFG038722(gb|YP_855928) (AHA_1389) CobQ/CobB/MinD/ParA family protein [Polar flagella (CVF786)] [Aeromonas hydrophila subsp. hydrophila ATCC 7966]	84	25.792	6.6e-16
FHG67_RS06760	VFG037100(gb|NP_273110) (msrA/B(pilB)) trifunctional thioredoxin/methionine sulfoxide reductase A/B protein [MsrAB (VF0456)] [Neisseria meningitidis MC58]	81	38.365	4.19e-34
FHG67_RS06790	VFG049144(gb|YP_002918165.1) (acrB) acriflavine resistance protein B [AcrAB (VF0568)] [Klebsiella pneumoniae subsp. pneumoniae NTUH-K2044]	98	21.382	4.83e-34
FHG67_RS06890	VFG049152(gb|YP_006635478.1) (clbF) colibactin biosynthesis dehydrogenase ClbF [Colibactin (VF0573)] [Klebsiella pneumoniae subsp. pneumoniae 1084]	65	27.945	2.96e-33
FHG67_RS06920	VFG038734(gb|YP_856235) (flaB) flagellin [ND (AI144)] [Aeromonas hydrophila subsp. hydrophila ATCC 7966]	89	23.784	8.63e-10
FHG67_RS06980	VFG049148(gb|YP_006635474.1) (clbB) colibactin hybrid non-ribosomal peptide synthetase/type I polyketide synthase ClbB [Colibactin (VF0573)] [Klebsiella pneumoniae subsp. pneumoniae 1084]	91	29.653	8.22e-32
FHG67_RS07000	VFG032992(gb|NP_464816) (oatA) peptidoglycan O-acetyltransferase [OatA (VF0441)] [Listeria monocytogenes EGD-e]	97	25.721	7.8e-17
FHG67_RS07095	VFG049144(gb|YP_002918165.1) (acrB) acriflavine resistance protein B [AcrAB (VF0568)] [Klebsiella pneumoniae subsp. pneumoniae NTUH-K2044]	43	24.44	5.97e-44
FHG67_RS07100	VFG037720(gb|YP_001847164) (adeG) cation/multidrug efflux pump [AdeFGH efflux pump (VF0504)] [Acinetobacter baumannii ACICU]	99	24.645	8.81e-63
FHG67_RS07135	VFG036974(gb|NP_274719) (mtrC) membrane fusion protein MtrC [MtrCDE (VF0451)] [Neisseria meningitidis MC58]	62	23.473	3.46e-10
FHG67_RS07250	VFG007177(gb|NP_798078) (exsA) transcriptional regulator ExsA [T3SS1 (VF0408)] [Vibrio parahaemolyticus RIMD 2210633]	25	32.292	1.04e-08
FHG67_RS07385	VFG037678(gb|YP_001847021) (pgaC) poly-beta-1,6 N-acetyl-D-glucosamine synthase [PNAG (VF0472)] [Acinetobacter baumannii ACICU]	58	27.273	9.68e-22
FHG67_RS07540	VFG048459(gb|YP_002918375.1) (ybdA) enterobactin exporter EntS [Ent (VF0562)] [Klebsiella pneumoniae subsp. pneumoniae NTUH-K2044]	82	23.011	2.24e-11
FHG67_RS07575	VFG000670(gb|NP_706258) (gtrB) bactoprenol glucosyl transferase [LPS (VF0124)] [Shigella flexneri 2a str. 301]	92	34.853	9.98e-71
FHG67_RS07605	VFG014950(gb|NP_249457) (mucD) serine protease MucD precursor [Alginate regulation (CVF523)] [Pseudomonas aeruginosa PAO1]	73	39.259	1.12e-49
FHG67_RS07660	VFG001249(gb|NP_249790) (fleR) two-component response regulator [Flagella (VF0273)] [Pseudomonas aeruginosa PAO1]	29	28.972	2.05e-11
FHG67_RS07690	VFG013384(gb|NP_439218) (lpxB) lipid-A-disaccharide synthase [LOS (CVF494)] [Haemophilus influenzae Rd KW20]	89	33.503	7.53e-68
FHG67_RS07735	VFG046167(gb|YP_002305089.1) (CbuK_0688) Coxiella Dot/Icm type IVB secretion system translocated effector [T4SS effectors (CVF803)] [Coxiella burnetii CbuK_Q154]	46	32.353	9.86e-07
FHG67_RS07855	VFG043386(gb|NP_207858) (cheY) chemotaxis response regulator CheY [Pse5Ac7Ac (AI150)] [Helicobacter pylori 26695]	71	26.168	3.12e-12
FHG67_RS07860	VFG009810(gb|NP_215272) (phoR) Possible two component system response sensor kinase membrane associated PhoR [PhoP/R (CVF331)] [Mycobacterium tuberculosis H37Rv]	49	26.36	2.28e-17
FHG67_RS07870	VFG000680(gb|AAF13661) (capA) CapA, required for Poly-gamma-glutamate transport [Capsule (VF0141)] [Bacillus anthracis]	66	28.516	1.23e-23
FHG67_RS07900	VFG000262(gb|NP_273508) (tbpA) transferrin-binding protein A [Tbp (VF0046)] [Neisseria meningitidis MC58]	13	32.381	1.05e-07
FHG67_RS07910	VFG041248(gb|YP_094446) (ankY/legA9) Dot/Icm type IV secretion system effector LegA9/AnkY, ankyrin repeat-containing protein targeting the LCV for autophagy uptake [Dot/Icm (SS047)] [Legionella pneumophila subsp. pneumophila str. Philadelphia 1]	48	36.792	6.47e-10
FHG67_RS07930	VFG046167(gb|YP_002305089.1) (CbuK_0688) Coxiella Dot/Icm type IVB secretion system translocated effector [T4SS effectors (CVF803)] [Coxiella burnetii CbuK_Q154]	37	46.97	9.05e-23
FHG67_RS07935	VFG046167(gb|YP_002305089.1) (CbuK_0688) Coxiella Dot/Icm type IVB secretion system translocated effector [T4SS effectors (CVF803)] [Coxiella burnetii CbuK_Q154]	21	45.588	8.22e-21
FHG67_RS07940	VFG046167(gb|YP_002305089.1) (CbuK_0688) Coxiella Dot/Icm type IVB secretion system translocated effector [T4SS effectors (CVF803)] [Coxiella burnetii CbuK_Q154]	40	44.697	1.35e-19
FHG67_RS08030	VFG046167(gb|YP_002305089.1) (CbuK_0688) Coxiella Dot/Icm type IVB secretion system translocated effector [T4SS effectors (CVF803)] [Coxiella burnetii CbuK_Q154]	34	44.526	1.25e-23
FHG67_RS08055	VFG001965(gb|NP_282578) (Cj1437c) aminotransferase [Capsule (VF0323)] [Campylobacter jejuni subsp. jejuni NCTC 11168]	87	26.113	8.99e-20
FHG67_RS08075	VFG045467(gb|YP_107884) (cdpA) cyclic di-GMP phosphodiesterase [CdpA (VF0432)] [Burkholderia pseudomallei K96243]	51	22.33	1.91e-16
FHG67_RS08080	VFG011946(gb|NP_282174) (flgR) sigma-54 associated transcriptional activator [Pse5Ac7Ac, Pse5Ac7Am, Pse8OAc, Pse5Am7AcGlnAc (AI151)] [Campylobacter jejuni subsp. jejuni NCTC 11168]	54	40.845	3.88e-07
FHG67_RS08085	VFG002529(gb|YP_109900) (tsr) methyl-accepting chemotaxis protein I [Flagella (VF0430)] [Burkholderia pseudomallei K96243]	40	26.95	1.26e-26
FHG67_RS08130	VFG000130(gb|NP_252238) (algI) alginate o-acetyltransferase AlgI [Alginate (VF0091)] [Pseudomonas aeruginosa PAO1]	78	39.737	1.49e-82
FHG67_RS08140	VFG000121(gb|NP_249453) (algU) alginate biosynthesis protein AlgZ/FimS [Alginate (VF0091)] [Pseudomonas aeruginosa PAO1]	79	35.088	1.68e-29
FHG67_RS08260	VFG002060(gb|NP_248764) (ppkA) serine/threonine protein kinase PpkA [HSI-I (VF0334)] [Pseudomonas aeruginosa PAO1]	15	24.286	3.61e-20
FHG67_RS08280	VFG005767(gb|NP_687682) (cylG) 3-ketoacyl-ACP-reductase CylG [Beta-hemolysin/cytolysin (CVF171)] [Streptococcus agalactiae 2603V/R]	97	32.794	7.66e-39
FHG67_RS08285	VFG002061(gb|NP_248765) (pppA) Pseudomonas protein phosphatase PppA [HSI-I (VF0334)] [Pseudomonas aeruginosa PAO1]	73	25.472	2.38e-11
FHG67_RS08295	VFG044329(gb|YP_002920249) (irp1) yersiniabactin polyketide synthase HMWP1 [Ybt (VF0564)] [Klebsiella pneumoniae subsp. pneumoniae NTUH-K2044]	97	23.094	5.92e-20
FHG67_RS08310	VFG043346(gb|YP_095789) (fleS/flrB) flagellar sensor histidine kinase FleS [polar flagella (AI149)] [Legionella pneumophila subsp. pneumophila str. Philadelphia 1]	19	28.448	8.87e-10
FHG67_RS08335	VFG002059(gb|NP_248763) (tagT) type six secretion associated protein TagT, ATP-binding component of ABC transporter [HSI-I (VF0334)] [Pseudomonas aeruginosa PAO1]	93	35.78	2.15e-29
FHG67_RS08355	VFG000359(gb|NP_405468) (ybtE) yersiniabactin siderophore biosynthetic protein [Yersiniabactin (VF0136)] [Yersinia pestis CO92]	91	26.68	1.37e-40
FHG67_RS08395	VFG000130(gb|NP_252238) (algI) alginate o-acetyltransferase AlgI [Alginate (VF0091)] [Pseudomonas aeruginosa PAO1]	67	38.484	7.27e-73
FHG67_RS08410	VFG000107(gb|NP_231100) (ctxA) cholera enterotoxin, A subunit [CT (VF0128)] [Vibrio cholerae O1 biovar El Tor str. N16961]	26	34.536	1.7e-19
FHG67_RS08420	VFG002409(gb|NP_645079) (essC) type VII secretion system protein EssC, FtsK/SpoIIIE family ATPase [Type VII secretion system (VF0403)] [Staphylococcus aureus subsp. aureus MW2]	22	32.864	1.25e-19
FHG67_RS08500	VFG000249(gb|NP_273676) (fbpB) iron(III) ABC transporter, permease protein [FbpABC (VF0272)] [Neisseria meningitidis MC58]	68	29.442	1.25e-09
FHG67_RS08505	VFG000249(gb|NP_273676) (fbpB) iron(III) ABC transporter, permease protein [FbpABC (VF0272)] [Neisseria meningitidis MC58]	90	25.194	1.47e-09
FHG67_RS08510	VFG001206(gb|NP_273675) (fbpC) iron(III) ABC transporter, ATP-binding protein [FbpABC (VF0272)] [Neisseria meningitidis MC58]	73	36.466	8.65e-55
FHG67_RS08530	VFG002060(gb|NP_248764) (ppkA) serine/threonine protein kinase PpkA [HSI-I (VF0334)] [Pseudomonas aeruginosa PAO1]	15	24.82	1.61e-11
FHG67_RS08540	VFG015521(gb|NP_252906) (phzG1) phenazine biosynthesis protein PhzG, pyridoxamine 5'-phosphate oxidase [Phenazines biosynthesis (CVF536)] [Pseudomonas aeruginosa PAO1]	89	29.843	1.39e-25
FHG67_RS08545	VFG000075(gb|NP_463962) (inlA) Internalin A [InlA (VF0069)] [Listeria monocytogenes EGD-e]	39	27.982	2.23e-21
FHG67_RS08555	VFG000930(gb|NP_752604) (entF) enterobactin synthase multienzyme complex component, ATP-dependent [Enterobactin (VF0228)] [Escherichia coli CFT073]	36	25.105	1.4e-10
FHG67_RS08575	VFG048409(gb|YP_002918380.1) (entA) 2,3-dihydroxybenzoate-2,3-dehydrogenase [Ent (VF0562)] [Klebsiella pneumoniae subsp. pneumoniae NTUH-K2044]	84	27.778	6.06e-21
FHG67_RS08615	VFG002158(gb|NP_464456) (lplA1) lipoate protein ligase [LplA1 (VF0347)] [Listeria monocytogenes EGD-e]	36	38.182	3.32e-12
FHG67_RS08750	VFG043204(gb|YP_855930) (cheW-2) chemotaxis protein CheW [ND (AI144)] [Aeromonas hydrophila subsp. hydrophila ATCC 7966]	84	29.71	2.68e-22
FHG67_RS08755	VFG043394(gb|YP_002343725) (cheA) chemotaxis histidine kinase [Pse5Ac7Ac, Pse5Ac7Am, Pse8OAc, Pse5Am7AcGlnAc (AI151)] [Campylobacter jejuni subsp. jejuni NCTC 11168]	37	42.64	6.09e-102
FHG67_RS08760	VFG002526(gb|YP_109897) (cheB) chemotaxis-specific methylesterase [Flagella (VF0430)] [Burkholderia pseudomallei K96243]	98	39.326	3.55e-84
FHG67_RS08765	VFG043402(gb|YP_002344511) (cheY) chemotaxis regulatory protein [Pse5Ac7Ac, Pse5Ac7Am, Pse8OAc, Pse5Am7AcGlnAc (AI151)] [Campylobacter jejuni subsp. jejuni NCTC 11168]	98	33.871	1.86e-16
FHG67_RS08910	VFG049084(gb|YP_002920347.1) (wzt) lipopolysaccharide O-antigen ABC transport system ATP-binding component [LPS (VF0561)] [Klebsiella pneumoniae subsp. pneumoniae NTUH-K2044]	48	45.366	4.97e-56
FHG67_RS08915	VFG000122(gb|NP_252230) (algD) GDP-mannose 6-dehydrogenase AlgD [Alginate (VF0091)] [Pseudomonas aeruginosa PAO1]	81	35.359	3.2e-62
FHG67_RS09045	VFG000330(gb|NP_438812) (kdtA) 3-deoxy-d-manno-octulosonic-acid transferase [LOS (VF0044)] [Haemophilus influenzae Rd KW20]	86	25.132	7.18e-25
FHG67_RS09135	VFG002144(gb|NP_220188) (cdsN) Type III secretion system ATPase [TTSS (VF0344)] [Chlamydia trachomatis D/UW-3/CX]	92	49.883	2.3e-136
FHG67_RS09140	VFG002130(gb|NP_220076) (cdsL) type III secretion translocase [TTSS (VF0344)] [Chlamydia trachomatis D/UW-3/CX]	62	25.131	1.04e-14
FHG67_RS09145	VFG038865(gb|YP_001140286) (fliG) flagellar motor switch protein G [Lateral flagella (VF0474)] [Aeromonas salmonicida subsp. salmonicida A449]	96	24.383	2.03e-20
FHG67_RS09150	VFG006557(gb|NP_207149) (fliF) flagellar M-ring protein FliF [Pse5Ac7Ac (AI150)] [Helicobacter pylori 26695]	98	26.962	1.08e-39
FHG67_RS09170	VFG001338(gb|NP_688170) (neuB) N-acetyl neuramic acid synthetase NeuB [Capsule (VF0274)] [Streptococcus agalactiae 2603V/R]	81	36.918	2.87e-56
FHG67_RS09180	VFG001859(gb|YP_096662) (feoB) ferrous iron transporter B [FeoAB (VF0160)] [Legionella pneumophila subsp. pneumophila str. Philadelphia 1]	97	28.571	1.31e-88
FHG67_RS09210	VFG001228(gb|NP_249102) (pilJ) twitching motility protein PilJ [Type IV pili (VF0082)] [Pseudomonas aeruginosa PAO1]	45	24.808	1.19e-24
FHG67_RS09240	VFG000919(gb|NP_756176) (chuW) Putative oxygen independent coproporphyrinogen III oxidase [Chu (VF0227)] [Escherichia coli CFT073]	74	24.315	3.17e-23
FHG67_RS09265	VFG000077(gb|NP_465991) (clpP) ATP-dependent Clp protease proteolytic subunit [ClpP (VF0074)] [Listeria monocytogenes EGD-e]	96	61.579	1.84e-89
FHG67_RS09315	VFG001864(gb|YP_094827) (mip) macrophage infectivity potentiator Mip [Mip (VF0153)] [Legionella pneumophila subsp. pneumophila str. Philadelphia 1]	86	36.036	5.86e-16
FHG67_RS09320	VFG043346(gb|YP_095789) (fleS/flrB) flagellar sensor histidine kinase FleS [polar flagella (AI149)] [Legionella pneumophila subsp. pneumophila str. Philadelphia 1]	65	26.21	8.55e-16
FHG67_RS09345	VFG009810(gb|NP_215272) (phoR) Possible two component system response sensor kinase membrane associated PhoR [PhoP/R (CVF331)] [Mycobacterium tuberculosis H37Rv]	25	27.018	7.72e-16
FHG67_RS09360	VFG037386(gb|YP_001847242) (bauE) ferric siderophore ABC transporter, ATP-binding protein BauE [Acinetobactin (VF0467)] [Acinetobacter baumannii ACICU]	30	25.943	2.52e-16
FHG67_RS09380	VFG041304(gb|YP_095978) (lirB) Dot/Icm type IV secretion system effector LirB [Dot/Icm (SS047)] [Legionella pneumophila subsp. pneumophila str. Philadelphia 1]	99	46.667	3.89e-42
FHG67_RS09395	VFG038219(gb|YP_001845364) (bfmR) biofilm-controlling response regulator [BfmRS (VF0463)] [Acinetobacter baumannii ACICU]	21	33.333	2.39e-09
FHG67_RS09415	VFG038698(gb|YP_855922) (cheY) chemotaxis protein CheY [ND (AI144)] [Aeromonas hydrophila subsp. hydrophila ATCC 7966]	35	28.205	1.91e-11
FHG67_RS09470	VFG048841(gb|YP_002920354.1) (wcaJ) undecaprenyl-phosphate glucose phosphotransferase [Capsule (VF0560)] [Klebsiella pneumoniae subsp. pneumoniae NTUH-K2044]	71	39.233	1.45e-62
FHG67_RS09480	VFG049158(gb|YP_006635484.1) (clbL) colibactin biosynthesis amidase ClbL [Colibactin (VF0573)] [Klebsiella pneumoniae subsp. pneumoniae 1084]	42	30.732	4.65e-16
FHG67_RS09540	VFG049152(gb|YP_006635478.1) (clbF) colibactin biosynthesis dehydrogenase ClbF [Colibactin (VF0573)] [Klebsiella pneumoniae subsp. pneumoniae 1084]	61	28.056	2.44e-32
FHG67_RS09910	VFG005767(gb|NP_687682) (cylG) 3-ketoacyl-ACP-reductase CylG [Beta-hemolysin/cytolysin (CVF171)] [Streptococcus agalactiae 2603V/R]	72	30	1.2e-24
FHG67_RS09945	VFG002492(gb|YP_106653) (fliN) flagellar motor switch protein FliN [Flagella (VF0430)] [Burkholderia pseudomallei K96243]	27	51.579	3.8e-30
FHG67_RS09955	VFG038666(gb|YP_855914) (fliP) flagellar biosynthesis protein FliP [ND (AI144)] [Aeromonas hydrophila subsp. hydrophila ATCC 7966]	82	53.023	1.92e-71
FHG67_RS09960	VFG002339(gb|YP_001006752) (fliQ) flagellar biosynthetic protein FliQ [Flagella (VF0394)] [Yersinia enterocolitica subsp. enterocolitica 8081]	93	45.679	3.82e-14
FHG67_RS09965	VFG001918(gb|NP_282326) (fliR) flagellar biosynthetic protein FliR [Flagella (VF0114)] [Campylobacter jejuni subsp. jejuni NCTC 11168]	85	34.545	1.95e-32
FHG67_RS09970	VFG001262(gb|NP_250140) (flhB) flagellar biosynthetic protein FlhB [Flagella (VF0273)] [Pseudomonas aeruginosa PAO1]	69	37.216	6.43e-56
FHG67_RS09975	VFG038682(gb|YP_855918) (flhA) flagellar biosynthesis protein FlhA [ND (AI144)] [Aeromonas hydrophila subsp. hydrophila ATCC 7966]	96	40.32	2.13e-157
FHG67_RS09980	VFG006582(gb|NP_207825) (flhF) flagellar biosynthesis protein [Pse5Ac7Ac (AI150)] [Helicobacter pylori 26695]	58	33.725	7.41e-35
FHG67_RS09985	VFG043350(gb|YP_095809) (fleN) flagellar synthesis regulator FleN [polar flagella (AI149)] [Legionella pneumophila subsp. pneumophila str. Philadelphia 1]	94	39.161	1.19e-68
FHG67_RS09995	VFG002319(gb|YP_001006726) (fliA) flagellar biosynthesis sigma factor [Flagella (VF0394)] [Yersinia enterocolitica subsp. enterocolitica 8081]	86	41.667	6.18e-58
FHG67_RS10040	VFG000079(gb|NP_463763) (clpC) endopeptidase Clp ATP-binding chain C [ClpC (VF0072)] [Listeria monocytogenes EGD-e]	99	45.8	0
FHG67_RS10050	VFG001226(gb|NP_249100) (pilH) twitching motility protein PilH [Type IV pili (VF0082)] [Pseudomonas aeruginosa PAO1]	24	30.252	1.51e-08
FHG67_RS10290	VFG002513(gb|YP_106902) (flgG) flagellar basal body rod protein FlgG [Flagella (VF0430)] [Burkholderia pseudomallei K96243]	97	33.216	3.07e-34
FHG67_RS10310	VFG037028(gb|NP_273273) (katA) catalase [KatA (VF0454)] [Neisseria meningitidis MC58]	99	55.901	0
FHG67_RS10320	VFG039454(gb|NP_820212) (coxU2) Coxiella Dot/Icm type IVB secretion system translocated effector [Dot/Icm (SS051)] [Coxiella burnetii RSA 493]	50	29.74	4.11e-18
FHG67_RS10390	VFG049152(gb|YP_006635478.1) (clbF) colibactin biosynthesis dehydrogenase ClbF [Colibactin (VF0573)] [Klebsiella pneumoniae subsp. pneumoniae 1084]	84	26.074	2.08e-28
FHG67_RS10470	VFG001386(gb|NP_215271) (phoP) Possible two component system response transcriptional positive regulator PhoP [PhoP (VF0286)] [Mycobacterium tuberculosis H37Rv]	80	28	2.19e-10
FHG67_RS10495	VFG000077(gb|NP_465991) (clpP) ATP-dependent Clp protease proteolytic subunit [ClpP (VF0074)] [Listeria monocytogenes EGD-e]	87	44.186	1.58e-50
FHG67_RS10550	VFG049133(gb|YP_002918166.1) (acrA) acriflavine resistance protein A [AcrAB (VF0568)] [Klebsiella pneumoniae subsp. pneumoniae NTUH-K2044]	34	30.088	6.74e-07
FHG67_RS10560	VFG036992(gb|NP_274718) (mtrD) multiple transferable resistance system protein MtrD [MtrCDE (VF0451)] [Neisseria meningitidis MC58]	93	21.389	3.6e-56
FHG67_RS10570	VFG000670(gb|NP_706258) (gtrB) bactoprenol glucosyl transferase [LPS (VF0124)] [Shigella flexneri 2a str. 301]	36	32.432	7.91e-11
FHG67_RS10585	VFG002550(gb|YP_109386) (wcbP) capsular polysaccharide biosynthesis dehydrogenase/reductase [Capsule I (VF0436)] [Burkholderia pseudomallei K96243]	96	27.5	1.85e-15
FHG67_RS10635	VFG045467(gb|YP_107884) (cdpA) cyclic di-GMP phosphodiesterase [CdpA (VF0432)] [Burkholderia pseudomallei K96243]	60	25.67	7.47e-13
FHG67_RS10655	VFG045607(gb|YP_096929) (lpg2936) Dot/Icm type IV secretion system effector [Dot/Icm (VF0156)] [Legionella pneumophila subsp. pneumophila str. Philadelphia 1]	91	28.07	6.81e-14
FHG67_RS10695	VFG037678(gb|YP_001847021) (pgaC) poly-beta-1,6 N-acetyl-D-glucosamine synthase [PNAG (VF0472)] [Acinetobacter baumannii ACICU]	25	27.749	2.39e-07
FHG67_RS10700	VFG001287(gb|NP_647405) (icaB) N-deacetylase, involved in polysaccharide intercellular adhesin(PIA) synthesis [Intercellular adhesion proteins (VF0014)] [Staphylococcus aureus subsp. aureus MW2]	69	28.436	1.78e-16
FHG67_RS10780	VFG046167(gb|YP_002305089.1) (CbuK_0688) Coxiella Dot/Icm type IVB secretion system translocated effector [T4SS effectors (CVF803)] [Coxiella burnetii CbuK_Q154]	38	46.212	8.41e-21
FHG67_RS10785	VFG006562(gb|NP_207150) (fliG) flagellar motor switch protein G [Pse5Ac7Ac (AI150)] [Helicobacter pylori 26695]	96	31.173	5.23e-48
FHG67_RS10815	VFG038219(gb|YP_001845364) (bfmR) biofilm-controlling response regulator [BfmRS (VF0463)] [Acinetobacter baumannii ACICU]	95	35.294	7.06e-36
FHG67_RS10820	VFG009810(gb|NP_215272) (phoR) Possible two component system response sensor kinase membrane associated PhoR [PhoP/R (CVF331)] [Mycobacterium tuberculosis H37Rv]	46	27.826	5.02e-15
FHG67_RS10840	VFG039262(gb|YP_001596115) (ankB) Coxiella Dot/Icm type IVB secretion system translocated effector, ankyrin repeat-containing protein [T4SS effectors (CVF803)] [Coxiella burnetii RSA 331]	58	28.364	3.92e-10
FHG67_RS10850	VFG038734(gb|YP_856235) (flaB) flagellin [ND (AI144)] [Aeromonas hydrophila subsp. hydrophila ATCC 7966]	99	36.721	1.71e-52
FHG67_RS10860	VFG038734(gb|YP_856235) (flaB) flagellin [ND (AI144)] [Aeromonas hydrophila subsp. hydrophila ATCC 7966]	99	34.754	2.58e-53
FHG67_RS11050	VFG000130(gb|NP_252238) (algI) alginate o-acetyltransferase AlgI [Alginate (VF0091)] [Pseudomonas aeruginosa PAO1]	85	35.422	2.96e-78
FHG67_RS11065	VFG048229(gb|YP_002921134.1) (fimB) tyrosine recombinase [Type I fimbriae (VF0566)] [Klebsiella pneumoniae subsp. pneumoniae NTUH-K2044]	57	31.176	4.05e-20
FHG67_RS11105	VFG000574(gb|NP_462662) (mgtB) Mg2+ transport protein [MgtBC (VF0106)] [Salmonella enterica subsp. enterica serovar Typhimurium str. LT2]	19	31.447	7.54e-11
FHG67_RS11195	VFG001206(gb|NP_273675) (fbpC) iron(III) ABC transporter, ATP-binding protein [FbpABC (VF0272)] [Neisseria meningitidis MC58]	73	30.303	6.95e-22
FHG67_RS11280	VFG049144(gb|YP_002918165.1) (acrB) acriflavine resistance protein B [AcrAB (VF0568)] [Klebsiella pneumoniae subsp. pneumoniae NTUH-K2044]	94	21.949	1.61e-53
FHG67_RS11325	VFG043207(gb|YP_001006775) (cheB) chemotaxis-specific methylesterase CheB [peritrichous flagella (AI145)] [Yersinia enterocolitica subsp. enterocolitica 8081]	99	46.957	5.99e-116
FHG67_RS11330	VFG002527(gb|YP_109898) (cheD) chemoreceptor glutamine deamidase CheD [Flagella (VF0430)] [Burkholderia pseudomallei K96243]	92	29.677	5.48e-21
FHG67_RS11335	VFG002530(gb|YP_109901) (cheW) chemotaxis protein CheW [Flagella (VF0430)] [Burkholderia pseudomallei K96243]	90	34.641	3.75e-31
FHG67_RS11340	VFG043209(gb|YP_001006778) (cheD) methyl-accepting chemotaxis protein CheD [peritrichous flagella (AI145)] [Yersinia enterocolitica subsp. enterocolitica 8081]	26	39.925	6.04e-53
FHG67_RS11345	VFG043211(gb|YP_001006780) (cheA) chemotaxis protein CheA [peritrichous flagella (AI145)] [Yersinia enterocolitica subsp. enterocolitica 8081]	97	30.791	4.48e-93
FHG67_RS11355	VFG002532(gb|YP_109903) (cheY1) chemotaxis two-component response regulator CheY1 [Flagella (VF0430)] [Burkholderia pseudomallei K96243]	94	34.513	6.9e-24
FHG67_RS11360	VFG001249(gb|NP_249790) (fleR) two-component response regulator [Flagella (VF0273)] [Pseudomonas aeruginosa PAO1]	27	34.783	1.97e-10
FHG67_RS11365	VFG009810(gb|NP_215272) (phoR) Possible two component system response sensor kinase membrane associated PhoR [PhoP/R (CVF331)] [Mycobacterium tuberculosis H37Rv]	31	30	7.42e-22
FHG67_RS11375	VFG038734(gb|YP_856235) (flaB) flagellin [ND (AI144)] [Aeromonas hydrophila subsp. hydrophila ATCC 7966]	99	35.505	7.58e-52
FHG67_RS11380	VFG038734(gb|YP_856235) (flaB) flagellin [ND (AI144)] [Aeromonas hydrophila subsp. hydrophila ATCC 7966]	98	34.868	5.68e-51
FHG67_RS11390	VFG001857(gb|YP_094782) (iraB) Di/tripeptide permease [IraAB (VF0293)] [Legionella pneumophila subsp. pneumophila str. Philadelphia 1]	91	25.11	8.28e-32
FHG67_RS11395	VFG000070(gb|NP_464110) (iap/cwhA) P60 extracellular protein, invasion associated protein Iap [p60 (VF0068)] [Listeria monocytogenes EGD-e]	26	30.357	3.12e-08
FHG67_RS11405	VFG000331(gb|NP_439675) (rfaE) ADP-heptose synthase [LOS (VF0044)] [Haemophilus influenzae Rd KW20]	95	40.752	1.61e-69
FHG67_RS11410	VFG002027(gb|NP_282297) (hldE) bifunctional D-beta-D-heptose 7-phosphate kinase/D-beta-D-heptose 1-phosphate adenylyltransferase [LOS (VF0326)] [Campylobacter jejuni subsp. jejuni NCTC 11168]	82	55.814	3.63e-42
FHG67_RS11420	VFG013465(gb|NP_439706) (kdsA) 2-dehydro-3-deoxyphosphooctonate aldolase [LOS (CVF494)] [Haemophilus influenzae Rd KW20]	91	43.866	4.97e-84
FHG67_RS11435	VFG000344(gb|NP_438273) (hitC) iron(III) ABC transporter, ATP-binding protein [HitABC (VF0268)] [Haemophilus influenzae Rd KW20]	100	30	1.02e-31
FHG67_RS11440	VFG043396(gb|YP_002344093) (rpoN) RNA polymerase factor sigma-54 [Pse5Ac7Ac, Pse5Ac7Am, Pse8OAc, Pse5Am7AcGlnAc (AI151)] [Campylobacter jejuni subsp. jejuni NCTC 11168]	71	28.869	2.24e-39
FHG67_RS11455	VFG038234(gb|YP_001845365) (bfmS) signal transduction histidine kinase [BfmRS (VF0463)] [Acinetobacter baumannii ACICU]	49	23.701	2.42e-14
FHG67_RS11460	VFG043345(gb|YP_095788) (fleR/flrC) sigma 54-dependent response regulator [polar flagella (AI149)] [Legionella pneumophila subsp. pneumophila str. Philadelphia 1]	97	39.545	3.19e-101
FHG67_RS11475	VFG002230(gb|NP_540335) (wbkC) GDP-mannose 4,6-dehydratase / GDP-4-amino-4,6-dideoxy-D-mannose formyltransferase [LPS (VF0367)] [Brucella melitensis bv. 1 str. 16M]	54	25.146	3.37e-09
FHG67_RS11525	VFG002013(gb|YP_095812) (flhB) flagellar biosynthetic protein FlhB [Flagella (VF0157)] [Legionella pneumophila subsp. pneumophila str. Philadelphia 1]	98	35.165	1.35e-10
FHG67_RS11555	VFG000145(gb|NP_250562) (lasA) LasA protease precursor [LasA (VF0088)] [Pseudomonas aeruginosa PAO1]	19	36.62	3.79e-08
FHG67_RS11565	VFG002047(gb|YP_404600) (gspD) general secretion pathway protein D [T2SS (VF0333)] [Shigella dysenteriae Sd197]	80	30.268	8.84e-60
FHG67_RS11570	VFG002048(gb|YP_404601) (gspE) general secretion pathway protein E [T2SS (VF0333)] [Shigella dysenteriae Sd197]	85	47.521	3.54e-153
FHG67_RS11575	VFG038280(gb|YP_855104) (exeF) general secretion pathway protein F [exe (SS209)] [Aeromonas hydrophila subsp. hydrophila ATCC 7966]	99	31.266	1.82e-74
FHG67_RS11580	VFG000180(gb|NP_251791) (xcpT) general secretion pathway protein G [xcp secretion system (VF0084)] [Pseudomonas aeruginosa PAO1]	91	41.379	7.68e-26
FHG67_RS11685	VFG000871(gb|NP_757239) (fimB) Type 1 fimbriae Regulatory protein fimB [Type 1 fimbriae (VF0221)] [Escherichia coli CFT073]	50	24.224	9.86e-11
FHG67_RS11720	VFG011850(gb|NP_281278) (flhG) ATP-binding protein [Flagella (CVF397)] [Campylobacter jejuni subsp. jejuni NCTC 11168]	49	32.432	2.37e-15
FHG67_RS11765	VFG000332(gb|NP_439271) (rfaD) ADP-L-glycero-D-mannoheptose-6-epimerase [LOS (VF0044)] [Haemophilus influenzae Rd KW20]	97	41.139	9.29e-71
FHG67_RS11775	VFG005767(gb|NP_687682) (cylG) 3-ketoacyl-ACP-reductase CylG [Beta-hemolysin/cytolysin (CVF171)] [Streptococcus agalactiae 2603V/R]	97	30.315	9.49e-34
FHG67_RS11785	VFG037118(gb|NP_273782) (recN) DNA repair protein RecN [RecN (VF0457)] [Neisseria meningitidis MC58]	99	31.504	7.72e-87
FHG67_RS11820	VFG002224(gb|NP_540321) (wbkA) mannosyltransferase [LPS (VF0367)] [Brucella melitensis bv. 1 str. 16M]	82	29.697	6.23e-36
FHG67_RS11835	VFG000161(gb|NP_251089) (pvdD) pyoverdine synthetase D [Pyoverdine (VF0094)] [Pseudomonas aeruginosa PAO1]	29	23.232	1.92e-08
FHG67_RS11850	VFG013412(gb|NP_439302) (lpxC) UDP-3-O-(R-3-hydroxymyristoyl)-N-acetylglucosamine deacetylase [LOS (CVF494)] [Haemophilus influenzae Rd KW20]	95	39.175	4.15e-65
FHG67_RS11855	VFG005767(gb|NP_687682) (cylG) 3-ketoacyl-ACP-reductase CylG [Beta-hemolysin/cytolysin (CVF171)] [Streptococcus agalactiae 2603V/R]	80	25.946	1.93e-14
FHG67_RS11915	VFG000130(gb|NP_252238) (algI) alginate o-acetyltransferase AlgI [Alginate (VF0091)] [Pseudomonas aeruginosa PAO1]	85	32.933	6.55e-61
FHG67_RS11945	VFG002230(gb|NP_540335) (wbkC) GDP-mannose 4,6-dehydratase / GDP-4-amino-4,6-dideoxy-D-mannose formyltransferase [LPS (VF0367)] [Brucella melitensis bv. 1 str. 16M]	57	28.455	5.28e-12
FHG67_RS11950	VFG002325(gb|YP_001006732) (fliS) flagellar protein FliS [Flagella (VF0394)] [Yersinia enterocolitica subsp. enterocolitica 8081]	71	35.135	2.37e-15
FHG67_RS12040	VFG039262(gb|YP_001596115) (ankB) Coxiella Dot/Icm type IVB secretion system translocated effector, ankyrin repeat-containing protein [T4SS effectors (CVF803)] [Coxiella burnetii RSA 331]	62	30	6.32e-19
FHG67_RS12075	VFG000130(gb|NP_252238) (algI) alginate o-acetyltransferase AlgI [Alginate (VF0091)] [Pseudomonas aeruginosa PAO1]	74	38.503	3.66e-73
FHG67_RS12120	VFG001269(gb|NP_879579) (cyaB) cyclolysin secretion ATP-binding protein [Cya (VF0028)] [Bordetella pertussis Tohama I]	10	36.957	7.37e-08
FHG67_RS12370	VFG046167(gb|YP_002305089.1) (CbuK_0688) Coxiella Dot/Icm type IVB secretion system translocated effector [T4SS effectors (CVF803)] [Coxiella burnetii CbuK_Q154]	25	47.761	5.01e-22
FHG67_RS12385	VFG002037(gb|AAA24685) (eltA) heat-labile enterotoxin A prepeptide (from human) [Heat-labile toxin (LT) (VF0210)] [Escherichia coli]	30	29.464	6.11e-13
FHG67_RS12400	VFG000358(gb|NP_405467) (fyuA) pesticin/yersiniabactin receptor protein [Yersiniabactin (VF0136)] [Yersinia pestis CO92]	17	30.496	2.53e-14
FHG67_RS12430	VFG038694(gb|YP_855921) (fliA) flagellar biosynthesis sigma factor [ND (AI144)] [Aeromonas hydrophila subsp. hydrophila ATCC 7966]	36	28	1.36e-11
FHG67_RS12440	VFG045566(gb|YP_096368) (lpg2359) Dot/Icm type IV secretion system effector [Dot/Icm (VF0156)] [Legionella pneumophila subsp. pneumophila str. Philadelphia 1]	100	34.667	1.44e-20
FHG67_RS12470	VFG038759(gb|YP_857329) (fleS/flrB) two-component sensor kinase [ND (AI144)] [Aeromonas hydrophila subsp. hydrophila ATCC 7966]	65	26.482	2.43e-20
FHG67_RS12475	VFG038234(gb|YP_001845365) (bfmS) signal transduction histidine kinase [BfmRS (VF0463)] [Acinetobacter baumannii ACICU]	29	26.531	1.05e-20
FHG67_RS12495	VFG038831(gb|YP_857806) (pomB2) flagellar motor protein MotB [Polar flagella (CVF786)] [Aeromonas hydrophila subsp. hydrophila ATCC 7966]	42	34.507	5.74e-26
FHG67_RS12625	VFG016058(gb|NP_251114) (pvdL) peptide synthase PvdL [pyoverdine (IA001)] [Pseudomonas aeruginosa PAO1]	52	25.588	1.33e-11
FHG67_RS12645	VFG013276(gb|NP_438430) (opsX/rfaC) heptosyltransferase I [LOS (CVF494)] [Haemophilus influenzae Rd KW20]	86	22.581	1.35e-14
FHG67_RS12650	VFG000031(gb|NP_878988) (bplH) putative glycosyl transferase [LPS (VF0033)] [Bordetella pertussis Tohama I]	88	22.829	4.08e-17
FHG67_RS12710	VFG001964(gb|NP_282577) (Cj1436c) aminotransferase [Capsule (VF0323)] [Campylobacter jejuni subsp. jejuni NCTC 11168]	76	22.68	3.83e-09
FHG67_RS12720	VFG013327(gb|NP_438900) (yhxB/manB) phosphomannomutase [LOS (CVF494)] [Haemophilus influenzae Rd KW20]	96	34.483	1.46e-88
FHG67_RS12725	VFG016046(gb|NP_251103) (pvdH) diaminobutyrate-2-oxoglutarate aminotransferase PvdH [pyoverdine (IA001)] [Pseudomonas aeruginosa PAO1]	90	29.952	3.14e-45
FHG67_RS12735	VFG038710(gb|YP_855925) (cheB-2) chemotaxis-specific methylesterase [ND (AI144)] [Aeromonas hydrophila subsp. hydrophila ATCC 7966]	76	35.238	4.05e-11
FHG67_RS12770	VFG016046(gb|NP_251103) (pvdH) diaminobutyrate-2-oxoglutarate aminotransferase PvdH [pyoverdine (IA001)] [Pseudomonas aeruginosa PAO1]	93	24.413	4.03e-27
FHG67_RS12780	VFG018238(gb|NP_232914) (cqsA) CAI-1 autoinducer synthase [CAI-1 (VF0405)] [Vibrio cholerae O1 biovar El Tor str. N16961]	92	26.184	4.11e-32
FHG67_RS12830	VFG001965(gb|NP_282578) (Cj1437c) aminotransferase [Capsule (VF0323)] [Campylobacter jejuni subsp. jejuni NCTC 11168]	49	27.751	1.22e-07
FHG67_RS12860	VFG000130(gb|NP_252238) (algI) alginate o-acetyltransferase AlgI [Alginate (VF0091)] [Pseudomonas aeruginosa PAO1]	75	34.454	8.4e-70
FHG67_RS12915	VFG005776(gb|NP_687685) (cylA) ABC (ATP-binding cassette) transporter CylA [Beta-hemolysin/cytolysin (CVF171)] [Streptococcus agalactiae 2603V/R]	98	33.442	4.97e-34
FHG67_RS12955	VFG000679(gb|AAF13660) (dep/capD) gamma-glutamyltranspeptidase, required for polyglutamate anchoring to peptidoglycan [Capsule (VF0141)] [Bacillus anthracis]	72	32.212	4.53e-46
FHG67_RS12960	VFG000080(gb|NP_464522) (clpE) ATP-dependent protease [ClpE (VF0073)] [Listeria monocytogenes EGD-e]	74	43.514	4.96e-166
FHG67_RS13025	VFG000344(gb|NP_438273) (hitC) iron(III) ABC transporter, ATP-binding protein [HitABC (VF0268)] [Haemophilus influenzae Rd KW20]	91	23.729	2.38e-16
FHG67_RS13030	VFG001952(gb|NP_282565) (gmhA2) phosphoheptose isomerase [Capsule (VF0323)] [Campylobacter jejuni subsp. jejuni NCTC 11168]	94	47.849	6.86e-54
FHG67_RS13040	VFG013315(gb|NP_438813) (lgtF) beta-1,4-glucosyltransferase [LOS (CVF494)] [Haemophilus influenzae Rd KW20]	84	32.52	1.82e-44
FHG67_RS13105	VFG006592(gb|NP_207821) (fliM) flagellar motor switch protein FliM [Pse5Ac7Ac (AI150)] [Helicobacter pylori 26695]	94	35.294	3.4e-72
FHG67_RS13120	VFG041304(gb|YP_095978) (lirB) Dot/Icm type IV secretion system effector LirB [Dot/Icm (SS047)] [Legionella pneumophila subsp. pneumophila str. Philadelphia 1]	32	57.447	1.53e-30
FHG67_RS13155	VFG002492(gb|YP_106653) (fliN) flagellar motor switch protein FliN [Flagella (VF0430)] [Burkholderia pseudomallei K96243]	53	38.71	9.91e-20
FHG67_RS13175	VFG045607(gb|YP_096929) (lpg2936) Dot/Icm type IV secretion system effector [Dot/Icm (VF0156)] [Legionella pneumophila subsp. pneumophila str. Philadelphia 1]	89	24.034	6.38e-08
FHG67_RS13215	VFG000344(gb|NP_438273) (hitC) iron(III) ABC transporter, ATP-binding protein [HitABC (VF0268)] [Haemophilus influenzae Rd KW20]	91	34.322	1.4e-40
FHG67_RS13225	VFG048830(gb|YP_002920353.1) (gnd) 6-phosphogluconate dehydrogenase [Capsule (VF0560)] [Klebsiella pneumoniae subsp. pneumoniae NTUH-K2044]	65	26.267	6.73e-10
FHG67_RS13290	VFG043394(gb|YP_002343725) (cheA) chemotaxis histidine kinase [Pse5Ac7Ac, Pse5Ac7Am, Pse8OAc, Pse5Am7AcGlnAc (AI151)] [Campylobacter jejuni subsp. jejuni NCTC 11168]	31	41.026	2.82e-18
FHG67_RS13295	VFG038234(gb|YP_001845365) (bfmS) signal transduction histidine kinase [BfmRS (VF0463)] [Acinetobacter baumannii ACICU]	21	28.571	4.05e-21
FHG67_RS13300	VFG002526(gb|YP_109897) (cheB) chemotaxis-specific methylesterase [Flagella (VF0430)] [Burkholderia pseudomallei K96243]	91	37.363	7.33e-30
FHG67_RS13305	VFG038811(gb|YP_857347) (cheR-3) chemotaxis protein CheR [ND (AI144)] [Aeromonas hydrophila subsp. hydrophila ATCC 7966]	79	26.582	4.55e-20
FHG67_RS13395	VFG044172(gb|NP_756180) (chuV) ATP-binding hydrophilic protein ChuV [Chu (VF0227)] [Escherichia coli CFT073]	94	26.378	2.19e-27
FHG67_RS13415	VFG045340(gb|NP_539653) (ricA) Rab2 interacting conserved protein A [RicA (VF0414)] [Brucella melitensis bv. 1 str. 16M]	93	37.647	1.06e-39
FHG67_RS13420	VFG042972(gb|YP_002742499) (sipA) signal peptidase I [PI-2 (VF0530)] [Streptococcus pneumoniae Taiwan19F-14]	85	28.302	2.18e-08
FHG67_RS13425	VFG009810(gb|NP_215272) (phoR) Possible two component system response sensor kinase membrane associated PhoR [PhoP/R (CVF331)] [Mycobacterium tuberculosis H37Rv]	45	28.125	7.73e-14
FHG67_RS13430	VFG043373(gb|NP_207190) (cheA) histidine kinase CheA [Pse5Ac7Ac (AI150)] [Helicobacter pylori 26695]	88	28.125	7.21e-09
FHG67_RS13485	VFG038759(gb|YP_857329) (fleS/flrB) two-component sensor kinase [ND (AI144)] [Aeromonas hydrophila subsp. hydrophila ATCC 7966]	75	26.829	1.38e-20
FHG67_RS13490	VFG038755(gb|YP_857328) (fleR/flrC) transcriptional activator [ND (AI144)] [Aeromonas hydrophila subsp. hydrophila ATCC 7966]	30	37	4.51e-12
FHG67_RS13570	VFG000680(gb|AAF13661) (capA) CapA, required for Poly-gamma-glutamate transport [Capsule (VF0141)] [Bacillus anthracis]	56	26.298	4.68e-31
FHG67_RS13620	VFG015045(gb|NP_249821) (rhlC) rhamnosyltransferase 2 [Rhamnolipid biosynthesis (CVF524)] [Pseudomonas aeruginosa PAO1]	93	23.279	3.2e-18
FHG67_RS13630	VFG000964(gb|NP_270109) (hasC) UDP-glucose pyrophosphorylase [Hyaluronic acid capsule (VF0244)] [Streptococcus pyogenes M1 GAS]	68	27.35	2.14e-17
FHG67_RS13635	VFG013368(gb|NP_439034) (rffG) dTDP-glucose 46-dehydratase [LOS (CVF494)] [Haemophilus influenzae Rd KW20]	93	51.198	2.01e-120
FHG67_RS13645	VFG002375(gb|YP_001007267) (wbcA) sugar epimerase [O-antigen (VF0392)] [Yersinia enterocolitica subsp. enterocolitica 8081]	95	32.203	1.62e-29
FHG67_RS13650	VFG013354(gb|NP_439028) (kfiC) lipopolysaccharide biosynthesis protein [LOS (CVF494)] [Haemophilus influenzae Rd KW20]	17	40.777	1.98e-14
FHG67_RS13660	VFG013354(gb|NP_439028) (kfiC) lipopolysaccharide biosynthesis protein [LOS (CVF494)] [Haemophilus influenzae Rd KW20]	34	42.424	3.03e-19
FHG67_RS13665	VFG002187(gb|NP_816138) (cpsD) glycosyl transferase, group 2 family protein [Capsule (VF0361)] [Enterococcus faecalis V583]	66	29.474	1.56e-12
FHG67_RS13670	VFG000036(gb|NP_878993) (bplC) lipopolysaccharide biosynthesis protein [LPS (VF0033)] [Bordetella pertussis Tohama I]	94	30.46	1.71e-56
FHG67_RS13695	VFG002372(gb|YP_001007264) (wzx) O-unit flippase [O-antigen (VF0392)] [Yersinia enterocolitica subsp. enterocolitica 8081]	94	29.812	1.78e-47
FHG67_RS13755	VFG001309(gb|NP_644951) (cap8M) capsular polysaccharide synthesis enzyme Cap8M [Capsule (VF0003)] [Staphylococcus aureus subsp. aureus MW2]	45	40.741	5.01e-39
FHG67_RS13760	VFG001370(gb|NP_344884) (cps4F) capsular polysaccharide biosynthesis protein Cps4F [Capsule (VF0144)] [Streptococcus pneumoniae TIGR4]	96	25	5.22e-23
FHG67_RS13765	VFG001303(gb|NP_644945) (cap8G) capsular polysaccharide synthesis enzyme Cap8G [Capsule (VF0003)] [Staphylococcus aureus subsp. aureus MW2]	99	51.733	1.68e-141
FHG67_RS13770	VFG001302(gb|NP_644944) (cap8F) capsular polysaccharide synthesis enzyme Cap8F [Capsule (VF0003)] [Staphylococcus aureus subsp. aureus MW2]	99	43.089	7.45e-112
FHG67_RS13775	VFG001301(gb|NP_644943) (cap8E) capsular polysaccharide synthesis enzyme Cap8E [Capsule (VF0003)] [Staphylococcus aureus subsp. aureus MW2]	97	67.267	6.7e-171
FHG67_RS13785	VFG002361(gb|YP_001007253) (galE) UDP-glucose 4-epimerase [O-antigen (VF0392)] [Yersinia enterocolitica subsp. enterocolitica 8081]	94	27.564	5.01e-21
FHG67_RS13790	VFG001951(gb|NP_282564) (hddC) D-glycero-D-manno-heptose 1-phosphate guanosyltransferase [Capsule (VF0323)] [Campylobacter jejuni subsp. jejuni NCTC 11168]	92	30.594	6.56e-29
FHG67_RS13795	VFG000430(gb|NP_458739) (tviC) Vi polysaccharide biosynthesis protein, epimerase TviC [Vi antigen (VF0101)] [Salmonella enterica subsp. enterica serovar Typhi str. CT18]	95	29.651	5.75e-31
FHG67_RS13800	VFG049040(gb|YP_002920343.1) (wbbO) glycosyltransferase family 1 protein [LPS (VF0561)] [Klebsiella pneumoniae subsp. pneumoniae NTUH-K2044]	45	25.455	2.93e-07
FHG67_RS13815	VFG012019(gb|NP_282462) (pseA) pseudaminic acid biosynthesis PseA protein [Pse5Ac7Ac, Pse5Ac7Am, Pse8OAc, Pse5Am7AcGlnAc (AI151)] [Campylobacter jejuni subsp. jejuni NCTC 11168]	32	31.148	3.91e-10
FHG67_RS13820	VFG002368(gb|YP_001007260) (wbcG) putative glycosyltransferase [O-antigen (VF0392)] [Yersinia enterocolitica subsp. enterocolitica 8081]	69	30.769	5.12e-22
FHG67_RS13875	VFG000038(gb|NP_878995) (bplA) probable oxidoreductase [LPS (VF0033)] [Bordetella pertussis Tohama I]	74	18.846	2.48e-07
FHG67_RS13880	VFG013236(gb|NP_438231) (kdsB) 3-deoxy-manno-octulosonate cytidylyltransferase [LOS (CVF494)] [Haemophilus influenzae Rd KW20]	96	34.231	1.36e-39
FHG67_RS13890	VFG013418(gb|NP_439337) (gmhA/lpcA) phosphoheptose isomerase [LOS (CVF494)] [Haemophilus influenzae Rd KW20]	84	31.073	1.57e-19
FHG67_RS13915	VFG000907(gb|NP_755448) (hlyB) Hemolysin B [Hemolysin (VF0225)] [Escherichia coli CFT073]	42	34.836	9.15e-32
FHG67_RS13920	VFG000033(gb|NP_878990) (bplF) lipopolysaccharide biosynthesis protein [LPS (VF0033)] [Bordetella pertussis Tohama I]	99	38.821	1.61e-103
FHG67_RS13935	VFG001338(gb|NP_688170) (neuB) N-acetyl neuramic acid synthetase NeuB [Capsule (VF0274)] [Streptococcus agalactiae 2603V/R]	90	38.148	4.02e-51
FHG67_RS13945	VFG005767(gb|NP_687682) (cylG) 3-ketoacyl-ACP-reductase CylG [Beta-hemolysin/cytolysin (CVF171)] [Streptococcus agalactiae 2603V/R]	94	27.236	2.65e-26
FHG67_RS14005	VFG002226(gb|NP_540331) (per) perosamine synthetase [LPS (VF0367)] [Brucella melitensis bv. 1 str. 16M]	64	32.857	3.45e-45
FHG67_RS14010	VFG013236(gb|NP_438231) (kdsB) 3-deoxy-manno-octulosonate cytidylyltransferase [LOS (CVF494)] [Haemophilus influenzae Rd KW20]	19	32.11	1.75e-08
FHG67_RS14020	VFG002226(gb|NP_540331) (per) perosamine synthetase [LPS (VF0367)] [Brucella melitensis bv. 1 str. 16M]	62	38.43	3e-52
FHG67_RS14040	VFG001338(gb|NP_688170) (neuB) N-acetyl neuramic acid synthetase NeuB [Capsule (VF0274)] [Streptococcus agalactiae 2603V/R]	93	39.275	3.46e-70
FHG67_RS14045	VFG013471(gb|NP_439724) (lgtA) N-acetylglucosamine glycosyltransferase [LOS (CVF494)] [Haemophilus influenzae Rd KW20]	53	40.984	2.55e-20
FHG67_RS14050	VFG006717(gb|NP_465159) (lap) Listeria adhesion protein Lap [Lap (VF0444)] [Listeria monocytogenes EGD-e]	54	29.767	4.63e-15
FHG67_RS14055	VFG002364(gb|YP_001007256) (fcl) GDP-fucose synthetase [O-antigen (VF0392)] [Yersinia enterocolitica subsp. enterocolitica 8081]	97	57.605	1.35e-135
FHG67_RS14080	VFG001397(gb|NP_216547) (hspX) Heat shock protein HspX (alpha-crystallin homolog) (14 kDa antigen) (HSP16.3) [HspX (VF0301)] [Mycobacterium tuberculosis H37Rv]	67	30.851	3.05e-07
FHG67_RS14085	VFG001397(gb|NP_216547) (hspX) Heat shock protein HspX (alpha-crystallin homolog) (14 kDa antigen) (HSP16.3) [HspX (VF0301)] [Mycobacterium tuberculosis H37Rv]	65	37.363	2.99e-10
FHG67_RS14155	VFG000119(gb|NP_253948) (algR) alginate biosynthesis regulatory protein AlgR [Alginate (VF0091)] [Pseudomonas aeruginosa PAO1]	26	37.692	2.51e-11
FHG67_RS14185	VFG002530(gb|YP_109901) (cheW) chemotaxis protein CheW [Flagella (VF0430)] [Burkholderia pseudomallei K96243]	91	34.028	1.72e-26
FHG67_RS14195	VFG000133(gb|NP_252241) (algA) phosphomannose isomerase / guanosine 5'-diphospho-D-mannose pyrophosphorylase [Alginate (VF0091)] [Pseudomonas aeruginosa PAO1]	95	33.714	5.09e-62
FHG67_RS14220	VFG043390(gb|NP_208373) (pdxJ) pyridoxine 5'-phosphate synthase [Pse5Ac7Ac (AI150)] [Helicobacter pylori 26695]	99	27.106	1.37e-23
FHG67_RS14470	VFG000130(gb|NP_252238) (algI) alginate o-acetyltransferase AlgI [Alginate (VF0091)] [Pseudomonas aeruginosa PAO1]	80	36.842	6.29e-71
FHG67_RS14495	VFG000390(gb|NP_395174) (yscN) type III secretion system ATPase YscN [TTSS (VF0140)] [Yersinia pestis CO92]	88	30.861	1.83e-47
FHG67_RS14505	VFG001008(gb|NP_858282) (spa47) type III secretion system ATPase spa47 [TTSS (VF0118)] [Shigella flexneri 2a str. 301]	74	30.607	1.73e-41
FHG67_RS14560	VFG001284(gb|NP_647402) (icaR) ica operon transcriptional regulator IcaR [Intercellular adhesion proteins (VF0014)] [Staphylococcus aureus subsp. aureus MW2]	57	31.132	3e-07
FHG67_RS14630	VFG043346(gb|YP_095789) (fleS/flrB) flagellar sensor histidine kinase FleS [polar flagella (AI149)] [Legionella pneumophila subsp. pneumophila str. Philadelphia 1]	8	39.048	2.78e-15
FHG67_RS14645	VFG043209(gb|YP_001006778) (cheD) methyl-accepting chemotaxis protein CheD [peritrichous flagella (AI145)] [Yersinia enterocolitica subsp. enterocolitica 8081]	58	24.854	7.41e-25
FHG67_RS14675	VFG000670(gb|NP_706258) (gtrB) bactoprenol glucosyl transferase [LPS (VF0124)] [Shigella flexneri 2a str. 301]	45	22.941	1.04e-07
FHG67_RS14705	VFG045467(gb|YP_107884) (cdpA) cyclic di-GMP phosphodiesterase [CdpA (VF0432)] [Burkholderia pseudomallei K96243]	59	33.884	6.8e-41
FHG67_RS14710	VFG043346(gb|YP_095789) (fleS/flrB) flagellar sensor histidine kinase FleS [polar flagella (AI149)] [Legionella pneumophila subsp. pneumophila str. Philadelphia 1]	45	25.63	6.4e-14
FHG67_RS14715	VFG001226(gb|NP_249100) (pilH) twitching motility protein PilH [Type IV pili (VF0082)] [Pseudomonas aeruginosa PAO1]	64	27.835	7.18e-11
FHG67_RS14720	VFG009810(gb|NP_215272) (phoR) Possible two component system response sensor kinase membrane associated PhoR [PhoP/R (CVF331)] [Mycobacterium tuberculosis H37Rv]	27	27.757	1.31e-13
FHG67_RS14725	VFG002110(gb|YP_096826) (vipD) Dot/Icm type IV secretion system effector VipD, Phospholipase A1 [Dot/Icm (VF0156)] [Legionella pneumophila subsp. pneumophila str. Philadelphia 1]	13	32.11	6.82e-08
FHG67_RS14810	VFG000917(gb|NP_756170) (chuA) Outer membrane heme/hemoglobin receptor ChuA [Chu (VF0227)] [Escherichia coli CFT073]	15	31.579	7.58e-09
FHG67_RS15130	VFG001855(gb|YP_094724) (htpB) Hsp60, 60K heat shock protein HtpB [Hsp60 (VF0159)] [Legionella pneumophila subsp. pneumophila str. Philadelphia 1]	96	59.962	0
FHG67_RS15195	VFG001242(gb|NP_249775) (flgI) flagellar P-ring protein precursor FlgI [Flagella (VF0273)] [Pseudomonas aeruginosa PAO1]	86	37.604	1.76e-61
FHG67_RS15200	VFG038783(gb|YP_857340) (flgH) flagellar basal body L-ring protein [ND (AI144)] [Aeromonas hydrophila subsp. hydrophila ATCC 7966]	32	33.333	4.44e-08
FHG67_RS15210	VFG006701(gb|NP_208376) (flgG) flagellar basal-body rod protein (flgG) [Pse5Ac7Ac (AI150)] [Helicobacter pylori 26695]	100	54.545	6.46e-95
FHG67_RS15260	VFG037720(gb|YP_001847164) (adeG) cation/multidrug efflux pump [AdeFGH efflux pump (VF0504)] [Acinetobacter baumannii ACICU]	93	24.174	7.33e-54
FHG67_RS15385	VFG012033(gb|NP_282479) (pseD/maf2) motility accessory factor PseD [Pse5Ac7Ac, Pse5Ac7Am, Pse8OAc, Pse5Am7AcGlnAc (AI151)] [Campylobacter jejuni subsp. jejuni NCTC 11168]	42	28.253	8.74e-15
FHG67_RS15445	VFG001951(gb|NP_282564) (hddC) D-glycero-D-manno-heptose 1-phosphate guanosyltransferase [Capsule (VF0323)] [Campylobacter jejuni subsp. jejuni NCTC 11168]	88	25.446	4.59e-11
FHG67_RS15455	VFG001213(gb|NP_253236) (pilS) two-component sensor PilS [Type IV pili (VF0082)] [Pseudomonas aeruginosa PAO1]	43	27.803	3.78e-19
FHG67_RS15460	VFG038759(gb|YP_857329) (fleS/flrB) two-component sensor kinase [ND (AI144)] [Aeromonas hydrophila subsp. hydrophila ATCC 7966]	48	26.649	1.98e-24
FHG67_RS15470	VFG000033(gb|NP_878990) (bplF) lipopolysaccharide biosynthesis protein [LPS (VF0033)] [Bordetella pertussis Tohama I]	98	45.343	1.68e-121
FHG67_RS15560	VFG049152(gb|YP_006635478.1) (clbF) colibactin biosynthesis dehydrogenase ClbF [Colibactin (VF0573)] [Klebsiella pneumoniae subsp. pneumoniae 1084]	84	32.11	1.32e-47
FHG67_RS15595	VFG013064(gb|YP_405019) (shuA) outer membrane heme/hemoglobin receptor ShuA [Shu (VF0256)] [Shigella dysenteriae Sd197]	15	35.294	1.09e-11
FHG67_RS15605	VFG045590(gb|YP_096633) (lpg2628) Dot/Icm type IV secretion system effector [Dot/Icm (VF0156)] [Legionella pneumophila subsp. pneumophila str. Philadelphia 1]	82	29.439	4.74e-11
FHG67_RS15615	VFG010882(gb|YP_094896) (ccmF) cytochrome c heme lyase subunit CcmF [Cytochrome c muturation (ccm) locus (CVF358)] [Legionella pneumophila subsp. pneumophila str. Philadelphia 1]	95	29.173	1.36e-69
FHG67_RS15650	VFG037100(gb|NP_273110) (msrA/B(pilB)) trifunctional thioredoxin/methionine sulfoxide reductase A/B protein [MsrAB (VF0456)] [Neisseria meningitidis MC58]	73	47.541	3.94e-31
FHG67_RS15670	VFG039536(gb|NP_820549) (CBU_1566) Coxiella Dot/Icm type IVB secretion system translocated effector [T4SS effectors (CVF803)] [Coxiella burnetii RSA 493]	95	42.678	2.59e-60
FHG67_RS15695	VFG000037(gb|NP_878994) (bplB) probable acetyltransferase [LPS (VF0033)] [Bordetella pertussis Tohama I]	52	30.159	4.61e-07
FHG67_RS15700	VFG000075(gb|NP_463962) (inlA) Internalin A [InlA (VF0069)] [Listeria monocytogenes EGD-e]	14	31.169	1.95e-14
FHG67_RS15750	VFG000104(gb|NP_230488) (acfB) accessory colonization factor AcfB [ACF (VF0127)] [Vibrio cholerae O1 biovar El Tor str. N16961]	77	25.326	1.66e-29
FHG67_RS15755	VFG000104(gb|NP_230488) (acfB) accessory colonization factor AcfB [ACF (VF0127)] [Vibrio cholerae O1 biovar El Tor str. N16961]	77	24.22	4.88e-24
FHG67_RS15800	VFG001798(gb|YP_186826) (hlb) beta-hemolysin [<beta>-hemolysin (VF0002)] [Staphylococcus aureus subsp. aureus COL]	38	40.333	3.11e-71
FHG67_RS15850	VFG002276(gb|NP_561089) (colA) collagenase [kappa-toxin (VF0388)] [Clostridium perfringens str. 13]	73	27.92	1.61e-68
FHG67_RS16055	VFG043208(gb|YP_001006776) (cheR) chemotaxis methyltransferase CheR [peritrichous flagella (AI145)] [Yersinia enterocolitica subsp. enterocolitica 8081]	95	37.319	9.03e-62
FHG67_RS16080	VFG013508(gb|NP_439858) (wecA) undecaprenyl-phosphate alpha-N-acetylglucosaminyltransferase [LOS (CVF494)] [Haemophilus influenzae Rd KW20]	63	28.631	1.31e-11
FHG67_RS16155	VFG000307(gb|NP_207041) (napA) neutrophil activating protein NapA [HP-NAP (VF0052)] [Helicobacter pylori 26695]	85	30.657	1.92e-18
FHG67_RS16170	VFG000036(gb|NP_878993) (bplC) lipopolysaccharide biosynthesis protein [LPS (VF0033)] [Bordetella pertussis Tohama I]	97	32.153	1.99e-55
FHG67_RS16235	VFG001249(gb|NP_249790) (fleR) two-component response regulator [Flagella (VF0273)] [Pseudomonas aeruginosa PAO1]	88	35.833	5.9e-09
FHG67_RS16250	VFG005767(gb|NP_687682) (cylG) 3-ketoacyl-ACP-reductase CylG [Beta-hemolysin/cytolysin (CVF171)] [Streptococcus agalactiae 2603V/R]	95	36.585	3.08e-52
FHG67_RS16260	VFG013374(gb|NP_439075) (lpxD) UDP-3-O-(3-hydroxymyristoyl) glucosamine N-acyltransferase [LOS (CVF494)] [Haemophilus influenzae Rd KW20]	93	29.206	1.56e-34
FHG67_RS16505	VFG001951(gb|NP_282564) (hddC) D-glycero-D-manno-heptose 1-phosphate guanosyltransferase [Capsule (VF0323)] [Campylobacter jejuni subsp. jejuni NCTC 11168]	44	32.773	3.56e-10
FHG67_RS16665	VFG049152(gb|YP_006635478.1) (clbF) colibactin biosynthesis dehydrogenase ClbF [Colibactin (VF0573)] [Klebsiella pneumoniae subsp. pneumoniae 1084]	83	28.399	1.88e-39
FHG67_RS16725	VFG001206(gb|NP_273675) (fbpC) iron(III) ABC transporter, ATP-binding protein [FbpABC (VF0272)] [Neisseria meningitidis MC58]	35	33.673	3.63e-21
FHG67_RS16760	VFG017856(gb|YP_001007658) (pilW) type IV fimbrial biogenesis protein PilW [Type IV pili (CVF049)] [Yersinia enterocolitica subsp. enterocolitica 8081]	95	27.184	4.53e-23
FHG67_RS16770	VFG015994(gb|NP_251084) (pvdN) pyoverdine biosynthesis protein PvdN [pyoverdine (IA001)] [Pseudomonas aeruginosa PAO1]	89	21.503	6.7e-10
FHG67_RS16785	VFG009570(gb|NP_215864) (irtA) Iron-regulated transporter IrtA [mycobactin (IA031)] [Mycobacterium tuberculosis H37Rv]	83	27.65	6.49e-15
FHG67_RS16845	VFG045531(gb|YP_095688) (lpg1661) Dot/Icm type IV secretion system effector [Dot/Icm (VF0156)] [Legionella pneumophila subsp. pneumophila str. Philadelphia 1]	98	37.24	1.34e-47
FHG67_RS16870	VFG043346(gb|YP_095789) (fleS/flrB) flagellar sensor histidine kinase FleS [polar flagella (AI149)] [Legionella pneumophila subsp. pneumophila str. Philadelphia 1]	15	33.019	2.48e-12
FHG67_RS16890	VFG049152(gb|YP_006635478.1) (clbF) colibactin biosynthesis dehydrogenase ClbF [Colibactin (VF0573)] [Klebsiella pneumoniae subsp. pneumoniae 1084]	73	28.028	2.72e-28
FHG67_RS16995	VFG043209(gb|YP_001006778) (cheD) methyl-accepting chemotaxis protein CheD [peritrichous flagella (AI145)] [Yersinia enterocolitica subsp. enterocolitica 8081]	30	27.386	3.13e-17
FHG67_RS17030	VFG049148(gb|YP_006635474.1) (clbB) colibactin hybrid non-ribosomal peptide synthetase/type I polyketide synthase ClbB [Colibactin (VF0573)] [Klebsiella pneumoniae subsp. pneumoniae 1084]	96	26.347	1.02e-19
FHG67_RS17145	VFG037720(gb|YP_001847164) (adeG) cation/multidrug efflux pump [AdeFGH efflux pump (VF0504)] [Acinetobacter baumannii ACICU]	97	22.945	2.64e-65
FHG67_RS17180	VFG045467(gb|YP_107884) (cdpA) cyclic di-GMP phosphodiesterase [CdpA (VF0432)] [Burkholderia pseudomallei K96243]	64	27.957	1.08e-47
FHG67_RS17220	VFG007177(gb|NP_798078) (exsA) transcriptional regulator ExsA [T3SS1 (VF0408)] [Vibrio parahaemolyticus RIMD 2210633]	23	31.461	5.05e-07
FHG67_RS17245	VFG049152(gb|YP_006635478.1) (clbF) colibactin biosynthesis dehydrogenase ClbF [Colibactin (VF0573)] [Klebsiella pneumoniae subsp. pneumoniae 1084]	50	23.762	2e-10
FHG67_RS17360	VFG014893(gb|NP_254009) (algC) phosphomannomutase AlgC [Alginate biosynthesis (CVF522)] [Pseudomonas aeruginosa PAO1]	97	26.419	5.77e-36
FHG67_RS17390	VFG000670(gb|NP_706258) (gtrB) bactoprenol glucosyl transferase [LPS (VF0124)] [Shigella flexneri 2a str. 301]	83	28.643	2.68e-14
FHG67_RS17450	VFG002440(gb|YP_111528) (bprB) two-component response regulator [Bsa T3SS (VF0428)] [Burkholderia pseudomallei K96243]	96	28.972	2.74e-31
FHG67_RS17460	VFG002276(gb|NP_561089) (colA) collagenase [kappa-toxin (VF0388)] [Clostridium perfringens str. 13]	67	28.618	8.16e-73
FHG67_RS17465	VFG011414(gb|NP_539767) (kdsA) 2-dehydro-3-deoxyphosphooctonate aldolase [LPS (CVF383)] [Brucella melitensis bv. 1 str. 16M]	49	27.66	4.48e-11
FHG67_RS17555	VFG013236(gb|NP_438231) (kdsB) 3-deoxy-manno-octulosonate cytidylyltransferase [LOS (CVF494)] [Haemophilus influenzae Rd KW20]	93	41.803	6.5e-50
FHG67_RS17560	VFG001925(gb|NP_282549) (fliL) flagellar basal body protein FliL [Flagella (VF0114)] [Campylobacter jejuni subsp. jejuni NCTC 11168]	53	29.787	4.91e-07
FHG67_RS17565	VFG038831(gb|YP_857806) (pomB2) flagellar motor protein MotB [Polar flagella (CVF786)] [Aeromonas hydrophila subsp. hydrophila ATCC 7966]	92	24.013	8.87e-18
FHG67_RS17570	VFG038835(gb|YP_857807) (pomA2) chemotaxis protein PomA [Polar flagella (CVF786)] [Aeromonas hydrophila subsp. hydrophila ATCC 7966]	97	37.795	6.42e-53
FHG67_RS17615	VFG039386(gb|NP_819821) (coxH2) Coxiella Dot/Icm type IVB secretion system translocated effector [Dot/Icm (SS051)] [Coxiella burnetii RSA 493]	70	31.034	1.08e-08
FHG67_RS17690	VFG016005(gb|NP_251085) (pvdO) pyoverdine biosynthesis protein PvdO [pyoverdine (IA001)] [Pseudomonas aeruginosa PAO1]	87	25.54	1.04e-11
FHG67_RS17720	VFG002060(gb|NP_248764) (ppkA) serine/threonine protein kinase PpkA [HSI-I (VF0334)] [Pseudomonas aeruginosa PAO1]	10	28.962	2.82e-12
FHG67_RS17755	VFG049152(gb|YP_006635478.1) (clbF) colibactin biosynthesis dehydrogenase ClbF [Colibactin (VF0573)] [Klebsiella pneumoniae subsp. pneumoniae 1084]	63	26.575	1.19e-25
FHG67_RS17765	VFG037100(gb|NP_273110) (msrA/B(pilB)) trifunctional thioredoxin/methionine sulfoxide reductase A/B protein [MsrAB (VF0456)] [Neisseria meningitidis MC58]	97	44.118	5.5e-45
FHG67_RS17790	VFG015950(gb|NP_251075) (pvdQ) 3-oxo-C12-homoserine lactone acylase PvdQ [pyoverdine (IA001)] [Pseudomonas aeruginosa PAO1]	65	21.513	2.94e-09
FHG67_RS17880	VFG000075(gb|NP_463962) (inlA) Internalin A [InlA (VF0069)] [Listeria monocytogenes EGD-e]	84	31.507	1.83e-08
FHG67_RS17905	VFG005785(gb|NP_687688) (cylF) putative aminomethyltransferase CylF [Beta-hemolysin/cytolysin (CVF171)] [Streptococcus agalactiae 2603V/R]	64	23.984	1.94e-09
FHG67_RS18020	VFG002351(gb|YP_001006764) (flgB) flagellar basal-body rod protein FlgB [Flagella (VF0394)] [Yersinia enterocolitica subsp. enterocolitica 8081]	69	28.155	2.32e-08
FHG67_RS18025	VFG006686(gb|NP_208349) (flgC) flagellar basal-body rod protein FlgC [Flagella (CVF223)] [Helicobacter pylori 26695]	95	39.375	5.67e-30
FHG67_RS18030	VFG038622(gb|YP_855903) (fliE) flagellar hook-basal body complex protein FliE [ND (AI144)] [Aeromonas hydrophila subsp. hydrophila ATCC 7966]	57	32.877	7.39e-09
FHG67_RS18135	VFG000079(gb|NP_463763) (clpC) endopeptidase Clp ATP-binding chain C [ClpC (VF0072)] [Listeria monocytogenes EGD-e]	96	51.784	0
FHG67_RS18145	VFG001206(gb|NP_273675) (fbpC) iron(III) ABC transporter, ATP-binding protein [FbpABC (VF0272)] [Neisseria meningitidis MC58]	84	31.795	3.89e-25
FHG67_RS18225	VFG038722(gb|YP_855928) (AHA_1389) CobQ/CobB/MinD/ParA family protein [Polar flagella (CVF786)] [Aeromonas hydrophila subsp. hydrophila ATCC 7966]	95	29.412	2.74e-29
FHG67_RS18315	VFG043373(gb|NP_207190) (cheA) histidine kinase CheA [Pse5Ac7Ac (AI150)] [Helicobacter pylori 26695]	90	30.508	3.82e-07
FHG67_RS18320	VFG038234(gb|YP_001845365) (bfmS) signal transduction histidine kinase [BfmRS (VF0463)] [Acinetobacter baumannii ACICU]	46	27.53	6.74e-14
FHG67_RS18350	VFG001965(gb|NP_282578) (Cj1437c) aminotransferase [Capsule (VF0323)] [Campylobacter jejuni subsp. jejuni NCTC 11168]	52	28.708	5.12e-08
FHG67_RS18365	VFG014720(gb|NP_250152) (motD) flagellar motor protein [Deoxyhexose linking sugar, 209 Da capping structure (AI138)] [Pseudomonas aeruginosa PAO1]	96	25.769	8.18e-16
FHG67_RS18550	VFG038176(gb|YP_001847748) (ompA) outer membrane protein OmpA [OmpA (VF0464)] [Acinetobacter baumannii ACICU]	23	44.231	2.52e-20
FHG67_RS18570	VFG049120(gb|YP_002918207.1) (allB) allantoinase [Allantion utilization (VF0572)] [Klebsiella pneumoniae subsp. pneumoniae NTUH-K2044]	95	24.711	3.69e-22
FHG67_RS18620	VFG013248(gb|NP_438233) (msbA) lipid transporter ATP-binding/permease [LOS (CVF494)] [Haemophilus influenzae Rd KW20]	82	35.26	1.16e-108
FHG67_RS18625	VFG015515(gb|NP_252903) (phzE1) phenazine biosynthesis protein PhzE [Phenazines biosynthesis (CVF536)] [Pseudomonas aeruginosa PAO1]	95	26.042	7.62e-08
FHG67_RS18630	VFG044323(gb|YP_002920243) (ybtS) yersiniabactin biosynthesis salicylate synthase YbtS [Ybt (VF0564)] [Klebsiella pneumoniae subsp. pneumoniae NTUH-K2044]	57	32.593	2.64e-39
FHG67_RS18635	VFG049152(gb|YP_006635478.1) (clbF) colibactin biosynthesis dehydrogenase ClbF [Colibactin (VF0573)] [Klebsiella pneumoniae subsp. pneumoniae 1084]	69	27.273	6.82e-29
FHG67_RS18685	VFG000841(gb|YP_325609) (hlyB) hemolysin transport protein [Hemolysin (VF0207)] [Escherichia coli O157:H7 str. EDL933]	30	29.148	8.12e-12
FHG67_RS18695	VFG000344(gb|NP_438273) (hitC) iron(III) ABC transporter, ATP-binding protein [HitABC (VF0268)] [Haemophilus influenzae Rd KW20]	68	28.111	5.29e-21
FHG67_RS18800	VFG049150(gb|YP_006635476.1) (clbD) colibactin biosynthesis dehydrogenase ClbD [Colibactin (VF0573)] [Klebsiella pneumoniae subsp. pneumoniae 1084]	65	27.891	8.08e-21
FHG67_RS18825	VFG000344(gb|NP_438273) (hitC) iron(III) ABC transporter, ATP-binding protein [HitABC (VF0268)] [Haemophilus influenzae Rd KW20]	78	31.66	6.83e-27
FHG67_RS18830	VFG001206(gb|NP_273675) (fbpC) iron(III) ABC transporter, ATP-binding protein [FbpABC (VF0272)] [Neisseria meningitidis MC58]	74	32.353	9.7e-29
FHG67_RS18870	VFG043209(gb|YP_001006778) (cheD) methyl-accepting chemotaxis protein CheD [peritrichous flagella (AI145)] [Yersinia enterocolitica subsp. enterocolitica 8081]	89	28.185	2.77e-18
FHG67_RS18880	VFG006717(gb|NP_465159) (lap) Listeria adhesion protein Lap [Lap (VF0444)] [Listeria monocytogenes EGD-e]	44	27.273	7.05e-07
FHG67_RS18890	VFG000983(gb|NP_231094) (rtxA) RTX toxin RtxA [MARTX (VF0265)] [Vibrio cholerae O1 biovar El Tor str. N16961]	43	34.677	3.63e-12
FHG67_RS18900	VFG002529(gb|YP_109900) (tsr) methyl-accepting chemotaxis protein I [Flagella (VF0430)] [Burkholderia pseudomallei K96243]	56	26.599	2.91e-21
FHG67_RS18905	VFG007177(gb|NP_798078) (exsA) transcriptional regulator ExsA [T3SS1 (VF0408)] [Vibrio parahaemolyticus RIMD 2210633]	36	27.723	2.93e-08
FHG67_RS18950	VFG002224(gb|NP_540321) (wbkA) mannosyltransferase [LPS (VF0367)] [Brucella melitensis bv. 1 str. 16M]	81	25.806	2.38e-19
FHG67_RS18965	VFG001817(gb|NP_216900) (mbtA) Bifunctional enzyme MbtA: salicyl-AMP ligase (SAL-AMP ligase) + salicyl-S-ArCP synthetase [Mycobactin (VF0299)] [Mycobacterium tuberculosis H37Rv]	81	25.411	4.53e-24
FHG67_RS18970	VFG013065(gb|YP_405017) (shuT) periplasmic binding protein ShuT [Shu (VF0256)] [Shigella dysenteriae Sd197]	73	22.358	5.13e-09
FHG67_RS19045	VFG001955(gb|NP_282568) (Cj1427c) sugar-nucleotide epimerase/dehydratease [Capsule (VF0323)] [Campylobacter jejuni subsp. jejuni NCTC 11168]	70	27.801	7.58e-13
FHG67_RS19100	VFG001245(gb|NP_249778) (flgL) flagellar hook-associated protein 3 FlgL [Flagella (VF0273)] [Pseudomonas aeruginosa PAO1]	99	21.795	2.47e-15
FHG67_RS19105	VFG002342(gb|YP_001006755) (flgK) flagellar hook-associated protein 1 FlgK [Flagella (VF0394)] [Yersinia enterocolitica subsp. enterocolitica 8081]	50	29.607	8.32e-31
FHG67_RS19195	VFG011394(gb|NP_539748) (lpxD) UDP-3-O-[3-hydroxymyristoyl] glucosamine N-acyltransferase [LPS (CVF383)] [Brucella melitensis bv. 1 str. 16M]	79	32.993	1.66e-42
FHG67_RS19205	VFG046167(gb|YP_002305089.1) (CbuK_0688) Coxiella Dot/Icm type IVB secretion system translocated effector [T4SS effectors (CVF803)] [Coxiella burnetii CbuK_Q154]	43	46.809	7.46e-23
FHG67_RS19250	VFG038831(gb|YP_857806) (pomB2) flagellar motor protein MotB [Polar flagella (CVF786)] [Aeromonas hydrophila subsp. hydrophila ATCC 7966]	24	33.645	1.89e-10
FHG67_RS19340	VFG038722(gb|YP_855928) (AHA_1389) CobQ/CobB/MinD/ParA family protein [Polar flagella (CVF786)] [Aeromonas hydrophila subsp. hydrophila ATCC 7966]	96	34.413	1.13e-47
FHG67_RS19410	VFG038722(gb|YP_855928) (AHA_1389) CobQ/CobB/MinD/ParA family protein [Polar flagella (CVF786)] [Aeromonas hydrophila subsp. hydrophila ATCC 7966]	67	30.058	3.46e-27
FHG67_RS19470	VFG016046(gb|NP_251103) (pvdH) diaminobutyrate-2-oxoglutarate aminotransferase PvdH [pyoverdine (IA001)] [Pseudomonas aeruginosa PAO1]	64	29.355	1.31e-20
FHG67_RS19475	VFG001213(gb|NP_253236) (pilS) two-component sensor PilS [Type IV pili (VF0082)] [Pseudomonas aeruginosa PAO1]	59	23.56	2.04e-08
FHG67_RS19480	VFG038219(gb|YP_001845364) (bfmR) biofilm-controlling response regulator [BfmRS (VF0463)] [Acinetobacter baumannii ACICU]	97	31.718	4.75e-30
FHG67_RS19490	VFG000919(gb|NP_756176) (chuW) Putative oxygen independent coproporphyrinogen III oxidase [Chu (VF0227)] [Escherichia coli CFT073]	53	25.203	2e-20
FHG67_RS19515	VFG038722(gb|YP_855928) (AHA_1389) CobQ/CobB/MinD/ParA family protein [Polar flagella (CVF786)] [Aeromonas hydrophila subsp. hydrophila ATCC 7966]	52	36.686	1.15e-21
FHG67_RS19545	VFG002550(gb|YP_109386) (wcbP) capsular polysaccharide biosynthesis dehydrogenase/reductase [Capsule I (VF0436)] [Burkholderia pseudomallei K96243]	87	32.127	1.54e-32
FHG67_RS19550	VFG048962(gb|YP_002920365.1) (wzb) protein tyrosine phosphatase [Capsule (VF0560)] [Klebsiella pneumoniae subsp. pneumoniae NTUH-K2044]	83	29.605	1.64e-14
FHG67_RS19580	VFG005767(gb|NP_687682) (cylG) 3-ketoacyl-ACP-reductase CylG [Beta-hemolysin/cytolysin (CVF171)] [Streptococcus agalactiae 2603V/R]	79	27.727	8.01e-16
FHG67_RS20075	VFG045467(gb|YP_107884) (cdpA) cyclic di-GMP phosphodiesterase [CdpA (VF0432)] [Burkholderia pseudomallei K96243]	30	28.902	4.56e-08
FHG67_RS20080	VFG045467(gb|YP_107884) (cdpA) cyclic di-GMP phosphodiesterase [CdpA (VF0432)] [Burkholderia pseudomallei K96243]	56	21.271	1.63e-14
FHG67_RS20110	VFG045467(gb|YP_107884) (cdpA) cyclic di-GMP phosphodiesterase [CdpA (VF0432)] [Burkholderia pseudomallei K96243]	43	31.197	8.74e-34
FHG67_RS20205	VFG001287(gb|NP_647405) (icaB) N-deacetylase, involved in polysaccharide intercellular adhesin(PIA) synthesis [Intercellular adhesion proteins (VF0014)] [Staphylococcus aureus subsp. aureus MW2]	39	26.697	3.31e-12
FHG67_RS20300	VFG005767(gb|NP_687682) (cylG) 3-ketoacyl-ACP-reductase CylG [Beta-hemolysin/cytolysin (CVF171)] [Streptococcus agalactiae 2603V/R]	93	30.328	1.58e-28
FHG67_RS20325	VFG038839(gb|YP_858598) (flmH) short chain dehydrogenase/reductase family oxidoreductase [Polar flagella (CVF786)] [Aeromonas hydrophila subsp. hydrophila ATCC 7966]	80	30.137	5.86e-19
FHG67_RS20330	VFG000871(gb|NP_757239) (fimB) Type 1 fimbriae Regulatory protein fimB [Type 1 fimbriae (VF0221)] [Escherichia coli CFT073]	54	27.168	1.85e-08
FHG67_RS20345	VFG002527(gb|YP_109898) (cheD) chemoreceptor glutamine deamidase CheD [Flagella (VF0430)] [Burkholderia pseudomallei K96243]	80	30.657	9.48e-17
FHG67_RS20465	VFG015994(gb|NP_251084) (pvdN) pyoverdine biosynthesis protein PvdN [pyoverdine (IA001)] [Pseudomonas aeruginosa PAO1]	78	22.812	2.71e-16
FHG67_RS20560	VFG000130(gb|NP_252238) (algI) alginate o-acetyltransferase AlgI [Alginate (VF0091)] [Pseudomonas aeruginosa PAO1]	83	37.5	1.01e-76
FHG67_RS20570	VFG000130(gb|NP_252238) (algI) alginate o-acetyltransferase AlgI [Alginate (VF0091)] [Pseudomonas aeruginosa PAO1]	81	39.175	3.47e-91
FHG67_RS20585	VFG002224(gb|NP_540321) (wbkA) mannosyltransferase [LPS (VF0367)] [Brucella melitensis bv. 1 str. 16M]	94	30.027	8.38e-37
FHG67_RS20625	VFG000075(gb|NP_463962) (inlA) Internalin A [InlA (VF0069)] [Listeria monocytogenes EGD-e]	65	28.025	1.81e-15
FHG67_RS20640	VFG000917(gb|NP_756170) (chuA) Outer membrane heme/hemoglobin receptor ChuA [Chu (VF0227)] [Escherichia coli CFT073]	73	24.545	1.95e-13
FHG67_RS20670	VFG014950(gb|NP_249457) (mucD) serine protease MucD precursor [Alginate regulation (CVF523)] [Pseudomonas aeruginosa PAO1]	57	30.612	1.18e-23
FHG67_RS20695	VFG001300(gb|NP_644942) (cap8D) capsular polysaccharide synthesis enzyme Cap8D [Capsule (VF0003)] [Staphylococcus aureus subsp. aureus MW2]	87	42.805	1.7e-137
FHG67_RS20780	VFG041278(gb|YP_095455) (vpdC) Dot/Icm type IV secretion system effector VpdC [Dot/Icm (SS047)] [Legionella pneumophila subsp. pneumophila str. Philadelphia 1]	59	24.88	2.14e-10
FHG67_RS20825	VFG005767(gb|NP_687682) (cylG) 3-ketoacyl-ACP-reductase CylG [Beta-hemolysin/cytolysin (CVF171)] [Streptococcus agalactiae 2603V/R]	86	24.186	1.42e-10
FHG67_RS20925	VFG009810(gb|NP_215272) (phoR) Possible two component system response sensor kinase membrane associated PhoR [PhoP/R (CVF331)] [Mycobacterium tuberculosis H37Rv]	30	28.017	3.82e-20
FHG67_RS20945	VFG038176(gb|YP_001847748) (ompA) outer membrane protein OmpA [OmpA (VF0464)] [Acinetobacter baumannii ACICU]	26	32.673	3.98e-08
FHG67_RS20965	VFG038219(gb|YP_001845364) (bfmR) biofilm-controlling response regulator [BfmRS (VF0463)] [Acinetobacter baumannii ACICU]	96	36.797	6.71e-47
FHG67_RS21035	VFG000130(gb|NP_252238) (algI) alginate o-acetyltransferase AlgI [Alginate (VF0091)] [Pseudomonas aeruginosa PAO1]	77	42.246	1.69e-84
FHG67_RS21060	VFG038397(gb|YP_856376) (vasH/clpV) sigma-54 dependent transcriptional regulator [T6SS (SS194)] [Aeromonas hydrophila subsp. hydrophila ATCC 7966]	59	22.581	1.85e-07
FHG67_RS21065	VFG038722(gb|YP_855928) (AHA_1389) CobQ/CobB/MinD/ParA family protein [Polar flagella (CVF786)] [Aeromonas hydrophila subsp. hydrophila ATCC 7966]	57	26.163	1.7e-10
FHG67_RS21265	VFG017856(gb|YP_001007658) (pilW) type IV fimbrial biogenesis protein PilW [Type IV pili (CVF049)] [Yersinia enterocolitica subsp. enterocolitica 8081]	99	27.5	4.11e-28
FHG67_RS21510	VFG017856(gb|YP_001007658) (pilW) type IV fimbrial biogenesis protein PilW [Type IV pili (CVF049)] [Yersinia enterocolitica subsp. enterocolitica 8081]	98	24.601	1.85e-21

## Sheet: Table S6
Supplemetary data 1, Table S6. Predicted virulence-associated proteins in Leptospira weilii strain CUD13
Locus_tag	Annotated proteins in VFDB database	Amino acid length	Identity	E-value
FHG68_RS00050	VFG038763(gb|YP_857330) (fleQ/flrC) FleQ protein [ND (AI144)] [Aeromonas hydrophila subsp. hydrophila ATCC 7966]	95	25.648	5.36e-22
FHG68_RS00080	VFG038839(gb|YP_858598) (flmH) short chain dehydrogenase/reductase family oxidoreductase [Polar flagella (CVF786)] [Aeromonas hydrophila subsp. hydrophila ATCC 7966]	96	37.097	2.93e-47
FHG68_RS00110	VFG006562(gb|NP_207150) (fliG) flagellar motor switch protein G [Pse5Ac7Ac (AI150)] [Helicobacter pylori 26695]	99	38.372	3.76e-76
FHG68_RS00185	VFG001971(gb|NP_282584) (kpsF) D-arabinose 5-phosphate isomerase [Capsule (VF0323)] [Campylobacter jejuni subsp. jejuni NCTC 11168]	97	42.812	3.01e-77
FHG68_RS00205	VFG002529(gb|YP_109900) (tsr) methyl-accepting chemotaxis protein I [Flagella (VF0430)] [Burkholderia pseudomallei K96243]	46	26.022	1.66e-19
FHG68_RS00215	VFG000430(gb|NP_458739) (tviC) Vi polysaccharide biosynthesis protein, epimerase TviC [Vi antigen (VF0101)] [Salmonella enterica subsp. enterica serovar Typhi str. CT18]	98	27.879	1.83e-29
FHG68_RS00240	VFG038176(gb|YP_001847748) (ompA) outer membrane protein OmpA [OmpA (VF0464)] [Acinetobacter baumannii ACICU]	15	38.462	4.82e-13
FHG68_RS00265	VFG048896(gb|YP_002920359.1) (wcsT) galactoside O-acetyltransferase [Capsule (VF0560)] [Klebsiella pneumoniae subsp. pneumoniae NTUH-K2044]	57	30.968	9.75e-10
FHG68_RS00450	VFG016058(gb|NP_251114) (pvdL) peptide synthase PvdL [pyoverdine (IA001)] [Pseudomonas aeruginosa PAO1]	12	36.782	1.89e-08
FHG68_RS00470	VFG044323(gb|YP_002920243) (ybtS) yersiniabactin biosynthesis salicylate synthase YbtS [Ybt (VF0564)] [Klebsiella pneumoniae subsp. pneumoniae NTUH-K2044]	45	26.217	1.21e-20
FHG68_RS00600	VFG038759(gb|YP_857329) (fleS/flrB) two-component sensor kinase [ND (AI144)] [Aeromonas hydrophila subsp. hydrophila ATCC 7966]	20	35.652	2.82e-15
FHG68_RS00665	VFG038763(gb|YP_857330) (fleQ/flrC) FleQ protein [ND (AI144)] [Aeromonas hydrophila subsp. hydrophila ATCC 7966]	47	44.97	3.99e-90
FHG68_RS00680	VFG000841(gb|YP_325609) (hlyB) hemolysin transport protein [Hemolysin (VF0207)] [Escherichia coli O157:H7 str. EDL933]	85	32.514	8.78e-71
FHG68_RS00840	VFG000320(gb|NP_208266) (kdtB) lipopolysaccharide core biosynthesis protein [LPS (VF0056)] [Helicobacter pylori 26695]	96	41.401	4.74e-38
FHG68_RS00885	VFG001713(gb|NP_755457) (papX) PapX protein regulates flagellum synthesis to repress motility [P fimbriae (CVF425)] [Escherichia coli CFT073]	50	40.789	2.42e-08
FHG68_RS00900	VFG042869(gb|YP_095575) (pilF) type IV pilus biogenesis protein PilF [type IV pili (AI111)] [Legionella pneumophila subsp. pneumophila str. Philadelphia 1]	60	27.586	8.95e-07
FHG68_RS00950	VFG013265(gb|NP_438428) (orfM) deoxyribonucleotide triphosphate pyrophosphatase [LOS (CVF494)] [Haemophilus influenzae Rd KW20]	94	42.932	2.46e-41
FHG68_RS00955	VFG001206(gb|NP_273675) (fbpC) iron(III) ABC transporter, ATP-binding protein [FbpABC (VF0272)] [Neisseria meningitidis MC58]	33	28.358	3.54e-15
FHG68_RS00960	VFG038176(gb|YP_001847748) (ompA) outer membrane protein OmpA [OmpA (VF0464)] [Acinetobacter baumannii ACICU]	17	37.5	4.43e-16
FHG68_RS01005	VFG001206(gb|NP_273675) (fbpC) iron(III) ABC transporter, ATP-binding protein [FbpABC (VF0272)] [Neisseria meningitidis MC58]	68	33.036	2.18e-32
FHG68_RS01050	VFG038176(gb|YP_001847748) (ompA) outer membrane protein OmpA [OmpA (VF0464)] [Acinetobacter baumannii ACICU]	71	30.496	2.92e-07
FHG68_RS01065	VFG005767(gb|NP_687682) (cylG) 3-ketoacyl-ACP-reductase CylG [Beta-hemolysin/cytolysin (CVF171)] [Streptococcus agalactiae 2603V/R]	71	27.419	2.12e-14
FHG68_RS01095	VFG002224(gb|NP_540321) (wbkA) mannosyltransferase [LPS (VF0367)] [Brucella melitensis bv. 1 str. 16M]	41	27.397	1.01e-12
FHG68_RS01100	VFG002559(gb|YP_109395) (wcbH) glycosyl transferase [Capsule I (VF0436)] [Burkholderia pseudomallei K96243]	46	23.926	4.27e-10
FHG68_RS01110	VFG002556(gb|YP_109392) (wcbK) GDP sugar epimerase/dehydratase [Capsule I (VF0436)] [Burkholderia pseudomallei K96243]	99	33.231	1.09e-45
FHG68_RS01130	VFG000121(gb|NP_249453) (algU) alginate biosynthesis protein AlgZ/FimS [Alginate (VF0091)] [Pseudomonas aeruginosa PAO1]	96	28.902	2.64e-12
FHG68_RS01200	VFG009810(gb|NP_215272) (phoR) Possible two component system response sensor kinase membrane associated PhoR [PhoP/R (CVF331)] [Mycobacterium tuberculosis H37Rv]	48	30.172	6.12e-26
FHG68_RS01205	VFG038219(gb|YP_001845364) (bfmR) biofilm-controlling response regulator [BfmRS (VF0463)] [Acinetobacter baumannii ACICU]	94	37.054	9.06e-49
FHG68_RS01220	VFG000121(gb|NP_249453) (algU) alginate biosynthesis protein AlgZ/FimS [Alginate (VF0091)] [Pseudomonas aeruginosa PAO1]	90	28.804	1.95e-25
FHG68_RS01645	VFG043394(gb|YP_002343725) (cheA) chemotaxis histidine kinase [Pse5Ac7Ac, Pse5Ac7Am, Pse8OAc, Pse5Am7AcGlnAc (AI151)] [Campylobacter jejuni subsp. jejuni NCTC 11168]	55	30.986	3.42e-10
FHG68_RS01695	VFG039413(gb|YP_001424395) (ankH) Coxiella Dot/Icm type IVB secretion system translocated effector [Dot/Icm (SS051)] [Coxiella burnetii Dugway 5J108-111]	72	23.103	1.24e-08
FHG68_RS01715	VFG005767(gb|NP_687682) (cylG) 3-ketoacyl-ACP-reductase CylG [Beta-hemolysin/cytolysin (CVF171)] [Streptococcus agalactiae 2603V/R]	70	26.562	9.44e-16
FHG68_RS01740	VFG001089(gb|NP_464364) (hpt) hexose phosphate transport protein [Hpt (VF0264)] [Listeria monocytogenes EGD-e]	88	28	2.37e-36
FHG68_RS01790	VFG049133(gb|YP_002918166.1) (acrA) acriflavine resistance protein A [AcrAB (VF0568)] [Klebsiella pneumoniae subsp. pneumoniae NTUH-K2044]	22	31.818	2.51e-09
FHG68_RS01795	VFG037720(gb|YP_001847164) (adeG) cation/multidrug efflux pump [AdeFGH efflux pump (VF0504)] [Acinetobacter baumannii ACICU]	99	22.65	1.28e-67
FHG68_RS01800	VFG036992(gb|NP_274718) (mtrD) multiple transferable resistance system protein MtrD [MtrCDE (VF0451)] [Neisseria meningitidis MC58]	81	19.408	3.77e-35
FHG68_RS01860	VFG038722(gb|YP_855928) (AHA_1389) CobQ/CobB/MinD/ParA family protein [Polar flagella (CVF786)] [Aeromonas hydrophila subsp. hydrophila ATCC 7966]	85	25.792	5.08e-16
FHG68_RS01865	VFG048229(gb|YP_002921134.1) (fimB) tyrosine recombinase [Type I fimbriae (VF0566)] [Klebsiella pneumoniae subsp. pneumoniae NTUH-K2044]	51	22.527	2.11e-10
FHG68_RS01940	VFG038722(gb|YP_855928) (AHA_1389) CobQ/CobB/MinD/ParA family protein [Polar flagella (CVF786)] [Aeromonas hydrophila subsp. hydrophila ATCC 7966]	84	25.792	7e-16
FHG68_RS01945	VFG048229(gb|YP_002921134.1) (fimB) tyrosine recombinase [Type I fimbriae (VF0566)] [Klebsiella pneumoniae subsp. pneumoniae NTUH-K2044]	51	22.527	2.11e-10
FHG68_RS02040	VFG001372(gb|NP_344886) (cps4H) capsular polysaccharide biosynthesis protein Cps4H [Capsule (VF0144)] [Streptococcus pneumoniae TIGR4]	37	33.094	1.08e-15
FHG68_RS02175	VFG038831(gb|YP_857806) (pomB2) flagellar motor protein MotB [Polar flagella (CVF786)] [Aeromonas hydrophila subsp. hydrophila ATCC 7966]	62	38.298	8.82e-25
FHG68_RS02185	VFG001284(gb|NP_647402) (icaR) ica operon transcriptional regulator IcaR [Intercellular adhesion proteins (VF0014)] [Staphylococcus aureus subsp. aureus MW2]	26	31.373	4.94e-08
FHG68_RS02190	VFG042972(gb|YP_002742499) (sipA) signal peptidase I [PI-2 (VF0530)] [Streptococcus pneumoniae Taiwan19F-14]	83	26.946	3.15e-11
FHG68_RS02250	VFG001206(gb|NP_273675) (fbpC) iron(III) ABC transporter, ATP-binding protein [FbpABC (VF0272)] [Neisseria meningitidis MC58]	85	34.081	1.34e-34
FHG68_RS02290	VFG014707(gb|NP_250151) (motC) flagellar motor protein [Deoxyhexose linking sugar, 209 Da capping structure (AI138)] [Pseudomonas aeruginosa PAO1]	98	35.124	8.9e-48
FHG68_RS02320	VFG038234(gb|YP_001845365) (bfmS) signal transduction histidine kinase [BfmRS (VF0463)] [Acinetobacter baumannii ACICU]	37	29.577	8.76e-19
FHG68_RS02370	VFG013248(gb|NP_438233) (msbA) lipid transporter ATP-binding/permease [LOS (CVF494)] [Haemophilus influenzae Rd KW20]	82	36.609	3.1e-109
FHG68_RS02375	VFG013242(gb|NP_438232) (lpxK) tetraacyldisaccharide 4'-kinase [LOS (CVF494)] [Haemophilus influenzae Rd KW20]	79	32.847	3.25e-35
FHG68_RS02445	VFG038759(gb|YP_857329) (fleS/flrB) two-component sensor kinase [ND (AI144)] [Aeromonas hydrophila subsp. hydrophila ATCC 7966]	12	37	3.31e-11
FHG68_RS02475	VFG013436(gb|NP_439676) (htrB) lipid A biosynthesis lauroyl acyltransferase [LOS (CVF494)] [Haemophilus influenzae Rd KW20]	96	23.649	1.5e-15
FHG68_RS02500	VFG045340(gb|NP_539653) (ricA) Rab2 interacting conserved protein A [RicA (VF0414)] [Brucella melitensis bv. 1 str. 16M]	83	33.758	1.93e-26
FHG68_RS02645	VFG038234(gb|YP_001845365) (bfmS) signal transduction histidine kinase [BfmRS (VF0463)] [Acinetobacter baumannii ACICU]	60	24.017	9.58e-14
FHG68_RS02655	VFG049144(gb|YP_002918165.1) (acrB) acriflavine resistance protein B [AcrAB (VF0568)] [Klebsiella pneumoniae subsp. pneumoniae NTUH-K2044]	93	26.395	6.63e-103
FHG68_RS02660	VFG002226(gb|NP_540331) (per) perosamine synthetase [LPS (VF0367)] [Brucella melitensis bv. 1 str. 16M]	95	27.198	9.58e-32
FHG68_RS02665	VFG001310(gb|NP_644952) (cap8N) capsular polysaccharide synthesis enzyme Cap8N [Capsule (VF0003)] [Staphylococcus aureus subsp. aureus MW2]	53	28.962	1.11e-10
FHG68_RS02675	VFG037720(gb|YP_001847164) (adeG) cation/multidrug efflux pump [AdeFGH efflux pump (VF0504)] [Acinetobacter baumannii ACICU]	99	28.341	5.99e-120
FHG68_RS02685	VFG049152(gb|YP_006635478.1) (clbF) colibactin biosynthesis dehydrogenase ClbF [Colibactin (VF0573)] [Klebsiella pneumoniae subsp. pneumoniae 1084]	60	25.915	2.9e-24
FHG68_RS02715	VFG038234(gb|YP_001845365) (bfmS) signal transduction histidine kinase [BfmRS (VF0463)] [Acinetobacter baumannii ACICU]	27	28	9.62e-18
FHG68_RS02750	VFG001798(gb|YP_186826) (hlb) beta-hemolysin [<beta>-hemolysin (VF0002)] [Staphylococcus aureus subsp. aureus COL]	54	37.459	1.4e-59
FHG68_RS02825	VFG000700(gb|AAP42192) (bsc1) bifunctional; ribulose 5-phosphate reductase; CDP-ribitol pyrophosphorylase [Capsule (VF0043)] [Haemophilus influenzae str. 1007]	94	28.947	6.61e-19
FHG68_RS02865	VFG000119(gb|NP_253948) (algR) alginate biosynthesis regulatory protein AlgR [Alginate (VF0091)] [Pseudomonas aeruginosa PAO1]	23	37.255	1.55e-09
FHG68_RS02890	VFG001798(gb|YP_186826) (hlb) beta-hemolysin [<beta>-hemolysin (VF0002)] [Staphylococcus aureus subsp. aureus COL]	47	46.557	1.4e-84
FHG68_RS02905	VFG000121(gb|NP_249453) (algU) alginate biosynthesis protein AlgZ/FimS [Alginate (VF0091)] [Pseudomonas aeruginosa PAO1]	46	33.333	1.15e-07
FHG68_RS03080	VFG002184(gb|NP_816135) (cpsG) MurB family protein [Capsule (VF0361)] [Enterococcus faecalis V583]	97	26.688	4.41e-25
FHG68_RS03170	VFG038900(gb|YP_857314) (hlyA) Hemolysin A [Hemolysin, HlyA (CVF792)] [Aeromonas hydrophila subsp. hydrophila ATCC 7966]	97	23.488	5.75e-33
FHG68_RS03240	VFG002361(gb|YP_001007253) (galE) UDP-glucose 4-epimerase [O-antigen (VF0392)] [Yersinia enterocolitica subsp. enterocolitica 8081]	99	41.692	7.7e-72
FHG68_RS03245	VFG013390(gb|NP_439219) (lpxA) UDP-N-acetylglucosamine acyltransferase [LOS (CVF494)] [Haemophilus influenzae Rd KW20]	98	41.016	7.73e-64
FHG68_RS03255	VFG002225(gb|NP_540330) (gmd) GDP-mannose 4,6-dehydratase [LPS (VF0367)] [Brucella melitensis bv. 1 str. 16M]	98	61.471	2.49e-154
FHG68_RS03260	VFG049159(gb|YP_006635485.1) (clbM) precolibactin export MATE transporter ClbM [Colibactin (VF0573)] [Klebsiella pneumoniae subsp. pneumoniae 1084]	72	23.214	4.86e-10
FHG68_RS03355	VFG049148(gb|YP_006635474.1) (clbB) colibactin hybrid non-ribosomal peptide synthetase/type I polyketide synthase ClbB [Colibactin (VF0573)] [Klebsiella pneumoniae subsp. pneumoniae 1084]	51	26.047	4.07e-08
FHG68_RS03370	VFG038853(gb|YP_858604) (maf-2) Maf-2 [Polar flagella (CVF786)] [Aeromonas hydrophila subsp. hydrophila ATCC 7966]	62	23.832	1.91e-20
FHG68_RS03400	VFG000038(gb|NP_878995) (bplA) probable oxidoreductase [LPS (VF0033)] [Bordetella pertussis Tohama I]	66	24.473	2.35e-12
FHG68_RS03500	VFG000430(gb|NP_458739) (tviC) Vi polysaccharide biosynthesis protein, epimerase TviC [Vi antigen (VF0101)] [Salmonella enterica subsp. enterica serovar Typhi str. CT18]	96	24.425	1.34e-18
FHG68_RS03505	VFG013346(gb|NP_438972) (galU) glucosephosphate uridylyltransferase [LOS (CVF494)] [Haemophilus influenzae Rd KW20]	52	26.552	4.37e-09
FHG68_RS03545	VFG000121(gb|NP_249453) (algU) alginate biosynthesis protein AlgZ/FimS [Alginate (VF0091)] [Pseudomonas aeruginosa PAO1]	76	30.714	4.09e-11
FHG68_RS03560	VFG001247(gb|NP_249785) (fliD) flagellar capping protein FliD [Flagella (VF0273)] [Pseudomonas aeruginosa PAO1]	40	28.405	2.69e-15
FHG68_RS03765	VFG005776(gb|NP_687685) (cylA) ABC (ATP-binding cassette) transporter CylA [Beta-hemolysin/cytolysin (CVF171)] [Streptococcus agalactiae 2603V/R]	88	30.797	1.02e-23
FHG68_RS03790	VFG038839(gb|YP_858598) (flmH) short chain dehydrogenase/reductase family oxidoreductase [Polar flagella (CVF786)] [Aeromonas hydrophila subsp. hydrophila ATCC 7966]	76	29.148	1.26e-18
FHG68_RS03800	VFG000344(gb|NP_438273) (hitC) iron(III) ABC transporter, ATP-binding protein [HitABC (VF0268)] [Haemophilus influenzae Rd KW20]	70	33.04	1.64e-32
FHG68_RS03850	VFG044172(gb|NP_756180) (chuV) ATP-binding hydrophilic protein ChuV [Chu (VF0227)] [Escherichia coli CFT073]	90	28.39	8.5e-21
FHG68_RS03865	VFG010862(gb|YP_094891) (ccmA) ABC transporter involved in cytochrome c biogenesis, ATPase component CcmA [Cytochrome c muturation (ccm) locus (CVF358)] [Legionella pneumophila subsp. pneumophila str. Philadelphia 1]	85	32.292	4.51e-21
FHG68_RS03880	VFG001386(gb|NP_215271) (phoP) Possible two component system response transcriptional positive regulator PhoP [PhoP (VF0286)] [Mycobacterium tuberculosis H37Rv]	31	36.134	6.53e-15
FHG68_RS04090	VFG002482(gb|YP_111511) (tagAB-5) Type VI secretion system protein [T6SS-1 (VF0429)] [Burkholderia pseudomallei K96243]	32	34.737	3.22e-08
FHG68_RS04100	VFG000515(gb|NP_460380) (ssaN) type III secretion system ATPase SsaN [TTSS(SPI-2 encode) (VF0321)] [Salmonella enterica subsp. enterica serovar Typhimurium str. LT2]	57	27.972	9.53e-20
FHG68_RS04110	VFG001965(gb|NP_282578) (Cj1437c) aminotransferase [Capsule (VF0323)] [Campylobacter jejuni subsp. jejuni NCTC 11168]	56	24.675	2.62e-08
FHG68_RS04190	VFG000075(gb|NP_463962) (inlA) Internalin A [InlA (VF0069)] [Listeria monocytogenes EGD-e]	25	36.719	1.63e-14
FHG68_RS04275	VFG043391(gb|NP_208374) (pdxA) 4-hydroxythreonine-4-phosphate dehydrogenase [Pse5Ac7Ac (AI150)] [Helicobacter pylori 26695]	98	30	1.23e-31
FHG68_RS04285	VFG006171(gb|NP_274328) (pilW) type IV fimbrial biogenesis and twitching motility protein PilW [Type IV pili (CVF189)] [Neisseria meningitidis MC58]	84	26.056	1.57e-07
FHG68_RS04320	VFG014950(gb|NP_249457) (mucD) serine protease MucD precursor [Alginate regulation (CVF523)] [Pseudomonas aeruginosa PAO1]	34	36.364	6.17e-08
FHG68_RS04325	VFG014950(gb|NP_249457) (mucD) serine protease MucD precursor [Alginate regulation (CVF523)] [Pseudomonas aeruginosa PAO1]	85	39.826	1.89e-72
FHG68_RS04360	VFG002440(gb|YP_111528) (bprB) two-component response regulator [Bsa T3SS (VF0428)] [Burkholderia pseudomallei K96243]	76	29.213	4.11e-22
FHG68_RS04400	VFG001444(gb|AAG10151) (aslA) putative arylsulfatase [AslA (VF0238)] [Escherichia coli O18:K1:H7 str. RS218]	41	23.848	3.73e-08
FHG68_RS04460	VFG043209(gb|YP_001006778) (cheD) methyl-accepting chemotaxis protein CheD [peritrichous flagella (AI145)] [Yersinia enterocolitica subsp. enterocolitica 8081]	48	30.112	8.49e-26
FHG68_RS04560	VFG017856(gb|YP_001007658) (pilW) type IV fimbrial biogenesis protein PilW [Type IV pili (CVF049)] [Yersinia enterocolitica subsp. enterocolitica 8081]	95	26.266	7.9e-22
FHG68_RS04565	VFG045467(gb|YP_107884) (cdpA) cyclic di-GMP phosphodiesterase [CdpA (VF0432)] [Burkholderia pseudomallei K96243]	54	26.316	4.51e-14
FHG68_RS04620	VFG013315(gb|NP_438813) (lgtF) beta-1,4-glucosyltransferase [LOS (CVF494)] [Haemophilus influenzae Rd KW20]	95	35.772	7.65e-48
FHG68_RS04645	VFG000164(gb|NP_252911) (fptA) Fe(III)-pyochelin receptor precursor [Pyochelin (VF0095)] [Pseudomonas aeruginosa PAO1]	71	21.653	3.51e-10
FHG68_RS04650	VFG000071(gb|NP_463734) (mpl) Zinc metalloproteinase precursor [Mpl (VF0065)] [Listeria monocytogenes EGD-e]	63	24.806	7.03e-20
FHG68_RS04695	VFG001237(gb|NP_249770) (flgD) flagellar basal-body rod modification protein FlgD [Flagella (VF0273)] [Pseudomonas aeruginosa PAO1]	24	46.479	1.74e-11
FHG68_RS04700	VFG002511(gb|YP_106900) (flgE) flagellar hook protein FlgE [Flagella (VF0430)] [Burkholderia pseudomallei K96243]	98	31.624	4.1e-53
FHG68_RS04850	VFG000075(gb|NP_463962) (inlA) Internalin A [InlA (VF0069)] [Listeria monocytogenes EGD-e]	47	30.288	3.97e-11
FHG68_RS05235	VFG001826(gb|NP_217099) (relA) Probable GTP pyrophosphokinase RelA (ATP:GTP 3'-pyrophosphotransferase) (PPGPP synthetase I) ((P)PPGPP synthetase) (GTP diphosphokinase) [RelA (VF0287)] [Mycobacterium tuberculosis H37Rv]	97	39.335	0
FHG68_RS05285	VFG045330(gb|YP_095353) (lbtC) LbtC inner membrane protein required for import of Legiobactin [Legiobactin (VF0291)] [Legionella pneumophila subsp. pneumophila str. Philadelphia 1]	23	32.632	9.65e-07
FHG68_RS05325	VFG032992(gb|NP_464816) (oatA) peptidoglycan O-acetyltransferase [OatA (VF0441)] [Listeria monocytogenes EGD-e]	82	29.769	2.5e-22
FHG68_RS05450	VFG011519(gb|NP_540343) (wbpL) undecaprenyl-phosphate alpha-N-acetylglucosaminyltransferase [LPS (CVF383)] [Brucella melitensis bv. 1 str. 16M]	69	28.685	1.86e-17
FHG68_RS05515	VFG002190(gb|NP_816141) (cpsA) undecaprenyl diphosphate synthase [Capsule (VF0361)] [Enterococcus faecalis V583]	97	41.597	1.2e-64
FHG68_RS05520	VFG002189(gb|NP_816140) (cpsB) phosphatidate cytidylyltransferase [Capsule (VF0361)] [Enterococcus faecalis V583]	44	38.06	3.54e-21
FHG68_RS05530	VFG015000(gb|NP_252339) (mucP) metalloprotease protease [Alginate regulation (CVF523)] [Pseudomonas aeruginosa PAO1]	35	31.776	1.75e-19
FHG68_RS05600	VFG005767(gb|NP_687682) (cylG) 3-ketoacyl-ACP-reductase CylG [Beta-hemolysin/cytolysin (CVF171)] [Streptococcus agalactiae 2603V/R]	94	39.918	1.32e-56
FHG68_RS05610	VFG011430(gb|NP_540392) (acpXL) acyl carrier protein [LPS (CVF383)] [Brucella melitensis bv. 1 str. 16M]	95	68.493	1.39e-28
FHG68_RS05635	VFG006717(gb|NP_465159) (lap) Listeria adhesion protein Lap [Lap (VF0444)] [Listeria monocytogenes EGD-e]	98	23.245	1.3e-16
FHG68_RS05695	VFG001206(gb|NP_273675) (fbpC) iron(III) ABC transporter, ATP-binding protein [FbpABC (VF0272)] [Neisseria meningitidis MC58]	87	36.453	9.31e-32
FHG68_RS05780	VFG001342(gb|NP_688174) (cpsO) glycosyl transferase CpsO(V) [Capsule (VF0274)] [Streptococcus agalactiae 2603V/R]	34	43.564	1.63e-19
FHG68_RS05790	VFG046167(gb|YP_002305089.1) (CbuK_0688) Coxiella Dot/Icm type IVB secretion system translocated effector [T4SS effectors (CVF803)] [Coxiella burnetii CbuK_Q154]	43	42.683	4.25e-25
FHG68_RS05800	VFG046167(gb|YP_002305089.1) (CbuK_0688) Coxiella Dot/Icm type IVB secretion system translocated effector [T4SS effectors (CVF803)] [Coxiella burnetii CbuK_Q154]	30	46.667	2.39e-22
FHG68_RS05855	VFG001214(gb|NP_253237) (pilR) two-component response regulator PilR [Type IV pili (VF0082)] [Pseudomonas aeruginosa PAO1]	36	38.532	1.23e-16
FHG68_RS05865	VFG014950(gb|NP_249457) (mucD) serine protease MucD precursor [Alginate regulation (CVF523)] [Pseudomonas aeruginosa PAO1]	58	24.915	9.63e-08
FHG68_RS06010	VFG000075(gb|NP_463962) (inlA) Internalin A [InlA (VF0069)] [Listeria monocytogenes EGD-e]	45	29.26	4.7e-18
FHG68_RS06180	VFG000075(gb|NP_463962) (inlA) Internalin A [InlA (VF0069)] [Listeria monocytogenes EGD-e]	54	41.121	3.98e-16
FHG68_RS06225	VFG000143(gb|NP_253699) (waaF) heptosyltransferase I [LPS (VF0085)] [Pseudomonas aeruginosa PAO1]	97	26.801	1.07e-21
FHG68_RS06235	VFG038219(gb|YP_001845364) (bfmR) biofilm-controlling response regulator [BfmRS (VF0463)] [Acinetobacter baumannii ACICU]	96	32.883	1.19e-33
FHG68_RS06240	VFG009810(gb|NP_215272) (phoR) Possible two component system response sensor kinase membrane associated PhoR [PhoP/R (CVF331)] [Mycobacterium tuberculosis H37Rv]	28	28.897	3.73e-16
FHG68_RS06250	VFG000574(gb|NP_462662) (mgtB) Mg2+ transport protein [MgtBC (VF0106)] [Salmonella enterica subsp. enterica serovar Typhimurium str. LT2]	66	25.046	6.18e-20
FHG68_RS06265	VFG043392(gb|YP_002343698) (eptC) phosphoethanolamine transferase [Pse5Ac7Ac, Pse5Ac7Am, Pse8OAc, Pse5Am7AcGlnAc (AI151)] [Campylobacter jejuni subsp. jejuni NCTC 11168]	38	26.054	1.84e-12
FHG68_RS06295	VFG000344(gb|NP_438273) (hitC) iron(III) ABC transporter, ATP-binding protein [HitABC (VF0268)] [Haemophilus influenzae Rd KW20]	93	29.565	6.09e-26
FHG68_RS06305	VFG001882(gb|YP_095553) (pilD) type IV pilus prepilin peptidase PilD [Type IV pili (VF0155)] [Legionella pneumophila subsp. pneumophila str. Philadelphia 1]	75	26.201	5.02e-09
FHG68_RS06475	VFG048229(gb|YP_002921134.1) (fimB) tyrosine recombinase [Type I fimbriae (VF0566)] [Klebsiella pneumoniae subsp. pneumoniae NTUH-K2044]	52	25.907	6.77e-20
FHG68_RS06480	VFG038722(gb|YP_855928) (AHA_1389) CobQ/CobB/MinD/ParA family protein [Polar flagella (CVF786)] [Aeromonas hydrophila subsp. hydrophila ATCC 7966]	59	30.814	1.13e-15
FHG68_RS06625	VFG048229(gb|YP_002921134.1) (fimB) tyrosine recombinase [Type I fimbriae (VF0566)] [Klebsiella pneumoniae subsp. pneumoniae NTUH-K2044]	52	25.907	6.77e-20
FHG68_RS06630	VFG038722(gb|YP_855928) (AHA_1389) CobQ/CobB/MinD/ParA family protein [Polar flagella (CVF786)] [Aeromonas hydrophila subsp. hydrophila ATCC 7966]	59	30.814	1.13e-15
FHG68_RS06715	VFG048229(gb|YP_002921134.1) (fimB) tyrosine recombinase [Type I fimbriae (VF0566)] [Klebsiella pneumoniae subsp. pneumoniae NTUH-K2044]	51	22.527	2.19e-10
FHG68_RS06720	VFG038722(gb|YP_855928) (AHA_1389) CobQ/CobB/MinD/ParA family protein [Polar flagella (CVF786)] [Aeromonas hydrophila subsp. hydrophila ATCC 7966]	84	25.792	2.62e-16
FHG68_RS06810	VFG048229(gb|YP_002921134.1) (fimB) tyrosine recombinase [Type I fimbriae (VF0566)] [Klebsiella pneumoniae subsp. pneumoniae NTUH-K2044]	51	23.913	4.37e-12
FHG68_RS06815	VFG038722(gb|YP_855928) (AHA_1389) CobQ/CobB/MinD/ParA family protein [Polar flagella (CVF786)] [Aeromonas hydrophila subsp. hydrophila ATCC 7966]	84	26.126	1.5e-14
FHG68_RS06875	VFG012033(gb|NP_282479) (pseD/maf2) motility accessory factor PseD [Pse5Ac7Ac, Pse5Ac7Am, Pse8OAc, Pse5Am7AcGlnAc (AI151)] [Campylobacter jejuni subsp. jejuni NCTC 11168]	42	28.253	8.74e-15
FHG68_RS07000	VFG037720(gb|YP_001847164) (adeG) cation/multidrug efflux pump [AdeFGH efflux pump (VF0504)] [Acinetobacter baumannii ACICU]	93	24.174	7.33e-54
FHG68_RS07050	VFG006701(gb|NP_208376) (flgG) flagellar basal-body rod protein (flgG) [Pse5Ac7Ac (AI150)] [Helicobacter pylori 26695]	100	54.545	6.46e-95
FHG68_RS07060	VFG038783(gb|YP_857340) (flgH) flagellar basal body L-ring protein [ND (AI144)] [Aeromonas hydrophila subsp. hydrophila ATCC 7966]	32	33.333	4.44e-08
FHG68_RS07065	VFG001242(gb|NP_249775) (flgI) flagellar P-ring protein precursor FlgI [Flagella (VF0273)] [Pseudomonas aeruginosa PAO1]	86	37.604	1.76e-61
FHG68_RS07130	VFG001855(gb|YP_094724) (htpB) Hsp60, 60K heat shock protein HtpB [Hsp60 (VF0159)] [Legionella pneumophila subsp. pneumophila str. Philadelphia 1]	96	59.962	0
FHG68_RS07450	VFG000917(gb|NP_756170) (chuA) Outer membrane heme/hemoglobin receptor ChuA [Chu (VF0227)] [Escherichia coli CFT073]	15	31.579	7.58e-09
FHG68_RS07535	VFG002110(gb|YP_096826) (vipD) Dot/Icm type IV secretion system effector VipD, Phospholipase A1 [Dot/Icm (VF0156)] [Legionella pneumophila subsp. pneumophila str. Philadelphia 1]	13	32.11	6.82e-08
FHG68_RS07540	VFG009810(gb|NP_215272) (phoR) Possible two component system response sensor kinase membrane associated PhoR [PhoP/R (CVF331)] [Mycobacterium tuberculosis H37Rv]	27	27.376	6.05e-13
FHG68_RS07545	VFG043386(gb|NP_207858) (cheY) chemotaxis response regulator CheY [Pse5Ac7Ac (AI150)] [Helicobacter pylori 26695]	38	37.931	6.52e-11
FHG68_RS07550	VFG043346(gb|YP_095789) (fleS/flrB) flagellar sensor histidine kinase FleS [polar flagella (AI149)] [Legionella pneumophila subsp. pneumophila str. Philadelphia 1]	45	25.833	2.7e-14
FHG68_RS07555	VFG045467(gb|YP_107884) (cdpA) cyclic di-GMP phosphodiesterase [CdpA (VF0432)] [Burkholderia pseudomallei K96243]	59	33.884	6.8e-41
FHG68_RS07585	VFG000670(gb|NP_706258) (gtrB) bactoprenol glucosyl transferase [LPS (VF0124)] [Shigella flexneri 2a str. 301]	45	22.941	1.04e-07
FHG68_RS07615	VFG043209(gb|YP_001006778) (cheD) methyl-accepting chemotaxis protein CheD [peritrichous flagella (AI145)] [Yersinia enterocolitica subsp. enterocolitica 8081]	58	24.854	7.41e-25
FHG68_RS07630	VFG043346(gb|YP_095789) (fleS/flrB) flagellar sensor histidine kinase FleS [polar flagella (AI149)] [Legionella pneumophila subsp. pneumophila str. Philadelphia 1]	8	39.048	2.78e-15
FHG68_RS07700	VFG001284(gb|NP_647402) (icaR) ica operon transcriptional regulator IcaR [Intercellular adhesion proteins (VF0014)] [Staphylococcus aureus subsp. aureus MW2]	57	31.132	3e-07
FHG68_RS07755	VFG001008(gb|NP_858282) (spa47) type III secretion system ATPase spa47 [TTSS (VF0118)] [Shigella flexneri 2a str. 301]	74	30.607	1.73e-41
FHG68_RS07765	VFG000390(gb|NP_395174) (yscN) type III secretion system ATPase YscN [TTSS (VF0140)] [Yersinia pestis CO92]	88	30.861	1.83e-47
FHG68_RS07790	VFG000130(gb|NP_252238) (algI) alginate o-acetyltransferase AlgI [Alginate (VF0091)] [Pseudomonas aeruginosa PAO1]	80	36.842	6.29e-71
FHG68_RS08040	VFG043390(gb|NP_208373) (pdxJ) pyridoxine 5'-phosphate synthase [Pse5Ac7Ac (AI150)] [Helicobacter pylori 26695]	99	27.106	1.37e-23
FHG68_RS08065	VFG000133(gb|NP_252241) (algA) phosphomannose isomerase / guanosine 5'-diphospho-D-mannose pyrophosphorylase [Alginate (VF0091)] [Pseudomonas aeruginosa PAO1]	95	33.714	5.09e-62
FHG68_RS08075	VFG002530(gb|YP_109901) (cheW) chemotaxis protein CheW [Flagella (VF0430)] [Burkholderia pseudomallei K96243]	91	34.028	1.72e-26
FHG68_RS08105	VFG000119(gb|NP_253948) (algR) alginate biosynthesis regulatory protein AlgR [Alginate (VF0091)] [Pseudomonas aeruginosa PAO1]	26	37.692	2.51e-11
FHG68_RS08175	VFG001397(gb|NP_216547) (hspX) Heat shock protein HspX (alpha-crystallin homolog) (14 kDa antigen) (HSP16.3) [HspX (VF0301)] [Mycobacterium tuberculosis H37Rv]	65	37.363	2.99e-10
FHG68_RS08180	VFG001397(gb|NP_216547) (hspX) Heat shock protein HspX (alpha-crystallin homolog) (14 kDa antigen) (HSP16.3) [HspX (VF0301)] [Mycobacterium tuberculosis H37Rv]	67	30.851	3.05e-07
FHG68_RS08205	VFG002364(gb|YP_001007256) (fcl) GDP-fucose synthetase [O-antigen (VF0392)] [Yersinia enterocolitica subsp. enterocolitica 8081]	97	57.605	1.35e-135
FHG68_RS08210	VFG006717(gb|NP_465159) (lap) Listeria adhesion protein Lap [Lap (VF0444)] [Listeria monocytogenes EGD-e]	54	29.767	4.63e-15
FHG68_RS08215	VFG013471(gb|NP_439724) (lgtA) N-acetylglucosamine glycosyltransferase [LOS (CVF494)] [Haemophilus influenzae Rd KW20]	53	40.984	2.55e-20
FHG68_RS08220	VFG001338(gb|NP_688170) (neuB) N-acetyl neuramic acid synthetase NeuB [Capsule (VF0274)] [Streptococcus agalactiae 2603V/R]	93	39.275	3.46e-70
FHG68_RS08240	VFG002226(gb|NP_540331) (per) perosamine synthetase [LPS (VF0367)] [Brucella melitensis bv. 1 str. 16M]	62	38.43	3e-52
FHG68_RS08250	VFG013236(gb|NP_438231) (kdsB) 3-deoxy-manno-octulosonate cytidylyltransferase [LOS (CVF494)] [Haemophilus influenzae Rd KW20]	19	32.11	1.75e-08
FHG68_RS08255	VFG002226(gb|NP_540331) (per) perosamine synthetase [LPS (VF0367)] [Brucella melitensis bv. 1 str. 16M]	64	32.857	3.45e-45
FHG68_RS08315	VFG005767(gb|NP_687682) (cylG) 3-ketoacyl-ACP-reductase CylG [Beta-hemolysin/cytolysin (CVF171)] [Streptococcus agalactiae 2603V/R]	94	27.236	2.65e-26
FHG68_RS08325	VFG001338(gb|NP_688170) (neuB) N-acetyl neuramic acid synthetase NeuB [Capsule (VF0274)] [Streptococcus agalactiae 2603V/R]	90	38.148	4.02e-51
FHG68_RS08340	VFG000033(gb|NP_878990) (bplF) lipopolysaccharide biosynthesis protein [LPS (VF0033)] [Bordetella pertussis Tohama I]	99	38.821	1.61e-103
FHG68_RS08345	VFG000907(gb|NP_755448) (hlyB) Hemolysin B [Hemolysin (VF0225)] [Escherichia coli CFT073]	42	34.836	9.15e-32
FHG68_RS08370	VFG013418(gb|NP_439337) (gmhA/lpcA) phosphoheptose isomerase [LOS (CVF494)] [Haemophilus influenzae Rd KW20]	84	31.073	1.57e-19
FHG68_RS08380	VFG013236(gb|NP_438231) (kdsB) 3-deoxy-manno-octulosonate cytidylyltransferase [LOS (CVF494)] [Haemophilus influenzae Rd KW20]	96	34.231	1.36e-39
FHG68_RS08385	VFG000038(gb|NP_878995) (bplA) probable oxidoreductase [LPS (VF0033)] [Bordetella pertussis Tohama I]	74	18.846	2.48e-07
FHG68_RS08440	VFG002368(gb|YP_001007260) (wbcG) putative glycosyltransferase [O-antigen (VF0392)] [Yersinia enterocolitica subsp. enterocolitica 8081]	69	30.769	5.12e-22
FHG68_RS08445	VFG012019(gb|NP_282462) (pseA) pseudaminic acid biosynthesis PseA protein [Pse5Ac7Ac, Pse5Ac7Am, Pse8OAc, Pse5Am7AcGlnAc (AI151)] [Campylobacter jejuni subsp. jejuni NCTC 11168]	32	31.148	3.91e-10
FHG68_RS08460	VFG049040(gb|YP_002920343.1) (wbbO) glycosyltransferase family 1 protein [LPS (VF0561)] [Klebsiella pneumoniae subsp. pneumoniae NTUH-K2044]	45	25.455	2.93e-07
FHG68_RS08465	VFG000430(gb|NP_458739) (tviC) Vi polysaccharide biosynthesis protein, epimerase TviC [Vi antigen (VF0101)] [Salmonella enterica subsp. enterica serovar Typhi str. CT18]	95	29.651	5.75e-31
FHG68_RS08470	VFG001951(gb|NP_282564) (hddC) D-glycero-D-manno-heptose 1-phosphate guanosyltransferase [Capsule (VF0323)] [Campylobacter jejuni subsp. jejuni NCTC 11168]	92	30.594	6.56e-29
FHG68_RS08475	VFG002361(gb|YP_001007253) (galE) UDP-glucose 4-epimerase [O-antigen (VF0392)] [Yersinia enterocolitica subsp. enterocolitica 8081]	94	27.564	5.01e-21
FHG68_RS08485	VFG001301(gb|NP_644943) (cap8E) capsular polysaccharide synthesis enzyme Cap8E [Capsule (VF0003)] [Staphylococcus aureus subsp. aureus MW2]	97	67.267	6.7e-171
FHG68_RS08490	VFG001302(gb|NP_644944) (cap8F) capsular polysaccharide synthesis enzyme Cap8F [Capsule (VF0003)] [Staphylococcus aureus subsp. aureus MW2]	99	43.089	7.45e-112
FHG68_RS08495	VFG001303(gb|NP_644945) (cap8G) capsular polysaccharide synthesis enzyme Cap8G [Capsule (VF0003)] [Staphylococcus aureus subsp. aureus MW2]	99	51.733	1.68e-141
FHG68_RS08500	VFG001370(gb|NP_344884) (cps4F) capsular polysaccharide biosynthesis protein Cps4F [Capsule (VF0144)] [Streptococcus pneumoniae TIGR4]	96	25	5.22e-23
FHG68_RS08505	VFG001309(gb|NP_644951) (cap8M) capsular polysaccharide synthesis enzyme Cap8M [Capsule (VF0003)] [Staphylococcus aureus subsp. aureus MW2]	45	40.741	5.01e-39
FHG68_RS08560	VFG002372(gb|YP_001007264) (wzx) O-unit flippase [O-antigen (VF0392)] [Yersinia enterocolitica subsp. enterocolitica 8081]	94	29.812	1.78e-47
FHG68_RS08585	VFG000036(gb|NP_878993) (bplC) lipopolysaccharide biosynthesis protein [LPS (VF0033)] [Bordetella pertussis Tohama I]	94	30.46	1.71e-56
FHG68_RS08590	VFG002187(gb|NP_816138) (cpsD) glycosyl transferase, group 2 family protein [Capsule (VF0361)] [Enterococcus faecalis V583]	66	29.474	1.56e-12
FHG68_RS08595	VFG013354(gb|NP_439028) (kfiC) lipopolysaccharide biosynthesis protein [LOS (CVF494)] [Haemophilus influenzae Rd KW20]	34	42.424	3.03e-19
FHG68_RS08605	VFG013354(gb|NP_439028) (kfiC) lipopolysaccharide biosynthesis protein [LOS (CVF494)] [Haemophilus influenzae Rd KW20]	17	40.777	1.98e-14
FHG68_RS08610	VFG002375(gb|YP_001007267) (wbcA) sugar epimerase [O-antigen (VF0392)] [Yersinia enterocolitica subsp. enterocolitica 8081]	95	32.203	1.62e-29
FHG68_RS08620	VFG013368(gb|NP_439034) (rffG) dTDP-glucose 46-dehydratase [LOS (CVF494)] [Haemophilus influenzae Rd KW20]	93	51.198	2.01e-120
FHG68_RS08625	VFG000964(gb|NP_270109) (hasC) UDP-glucose pyrophosphorylase [Hyaluronic acid capsule (VF0244)] [Streptococcus pyogenes M1 GAS]	68	27.35	2.14e-17
FHG68_RS08635	VFG015045(gb|NP_249821) (rhlC) rhamnosyltransferase 2 [Rhamnolipid biosynthesis (CVF524)] [Pseudomonas aeruginosa PAO1]	93	23.279	3.2e-18
FHG68_RS08680	VFG000680(gb|AAF13661) (capA) CapA, required for Poly-gamma-glutamate transport [Capsule (VF0141)] [Bacillus anthracis]	56	26.298	4.68e-31
FHG68_RS08760	VFG038755(gb|YP_857328) (fleR/flrC) transcriptional activator [ND (AI144)] [Aeromonas hydrophila subsp. hydrophila ATCC 7966]	30	37	4.51e-12
FHG68_RS08765	VFG038759(gb|YP_857329) (fleS/flrB) two-component sensor kinase [ND (AI144)] [Aeromonas hydrophila subsp. hydrophila ATCC 7966]	75	26.829	1.38e-20
FHG68_RS08820	VFG043373(gb|NP_207190) (cheA) histidine kinase CheA [Pse5Ac7Ac (AI150)] [Helicobacter pylori 26695]	88	28.125	7.21e-09
FHG68_RS08825	VFG009810(gb|NP_215272) (phoR) Possible two component system response sensor kinase membrane associated PhoR [PhoP/R (CVF331)] [Mycobacterium tuberculosis H37Rv]	45	28.125	7.73e-14
FHG68_RS08830	VFG042972(gb|YP_002742499) (sipA) signal peptidase I [PI-2 (VF0530)] [Streptococcus pneumoniae Taiwan19F-14]	85	28.302	2.18e-08
FHG68_RS08835	VFG045340(gb|NP_539653) (ricA) Rab2 interacting conserved protein A [RicA (VF0414)] [Brucella melitensis bv. 1 str. 16M]	93	37.647	1.06e-39
FHG68_RS08855	VFG044172(gb|NP_756180) (chuV) ATP-binding hydrophilic protein ChuV [Chu (VF0227)] [Escherichia coli CFT073]	94	26.378	2.19e-27
FHG68_RS08945	VFG038811(gb|YP_857347) (cheR-3) chemotaxis protein CheR [ND (AI144)] [Aeromonas hydrophila subsp. hydrophila ATCC 7966]	79	26.582	4.55e-20
FHG68_RS08950	VFG002526(gb|YP_109897) (cheB) chemotaxis-specific methylesterase [Flagella (VF0430)] [Burkholderia pseudomallei K96243]	91	37.363	7.33e-30
FHG68_RS08955	VFG038234(gb|YP_001845365) (bfmS) signal transduction histidine kinase [BfmRS (VF0463)] [Acinetobacter baumannii ACICU]	21	28.571	4.05e-21
FHG68_RS08960	VFG043394(gb|YP_002343725) (cheA) chemotaxis histidine kinase [Pse5Ac7Ac, Pse5Ac7Am, Pse8OAc, Pse5Am7AcGlnAc (AI151)] [Campylobacter jejuni subsp. jejuni NCTC 11168]	31	41.026	2.82e-18
FHG68_RS09025	VFG048830(gb|YP_002920353.1) (gnd) 6-phosphogluconate dehydrogenase [Capsule (VF0560)] [Klebsiella pneumoniae subsp. pneumoniae NTUH-K2044]	65	26.267	6.73e-10
FHG68_RS09035	VFG000344(gb|NP_438273) (hitC) iron(III) ABC transporter, ATP-binding protein [HitABC (VF0268)] [Haemophilus influenzae Rd KW20]	91	34.322	1.4e-40
FHG68_RS09075	VFG045607(gb|YP_096929) (lpg2936) Dot/Icm type IV secretion system effector [Dot/Icm (VF0156)] [Legionella pneumophila subsp. pneumophila str. Philadelphia 1]	89	24.034	6.38e-08
FHG68_RS09095	VFG002492(gb|YP_106653) (fliN) flagellar motor switch protein FliN [Flagella (VF0430)] [Burkholderia pseudomallei K96243]	53	38.71	9.91e-20
FHG68_RS09130	VFG041304(gb|YP_095978) (lirB) Dot/Icm type IV secretion system effector LirB [Dot/Icm (SS047)] [Legionella pneumophila subsp. pneumophila str. Philadelphia 1]	32	57.447	1.53e-30
FHG68_RS09145	VFG006592(gb|NP_207821) (fliM) flagellar motor switch protein FliM [Pse5Ac7Ac (AI150)] [Helicobacter pylori 26695]	94	35.294	3.4e-72
FHG68_RS09210	VFG013315(gb|NP_438813) (lgtF) beta-1,4-glucosyltransferase [LOS (CVF494)] [Haemophilus influenzae Rd KW20]	84	32.52	1.82e-44
FHG68_RS09220	VFG001952(gb|NP_282565) (gmhA2) phosphoheptose isomerase [Capsule (VF0323)] [Campylobacter jejuni subsp. jejuni NCTC 11168]	94	47.849	6.86e-54
FHG68_RS09225	VFG000344(gb|NP_438273) (hitC) iron(III) ABC transporter, ATP-binding protein [HitABC (VF0268)] [Haemophilus influenzae Rd KW20]	91	23.729	2.38e-16
FHG68_RS09285	VFG000080(gb|NP_464522) (clpE) ATP-dependent protease [ClpE (VF0073)] [Listeria monocytogenes EGD-e]	74	43.514	4.96e-166
FHG68_RS09290	VFG000679(gb|AAF13660) (dep/capD) gamma-glutamyltranspeptidase, required for polyglutamate anchoring to peptidoglycan [Capsule (VF0141)] [Bacillus anthracis]	72	32.212	4.53e-46
FHG68_RS09330	VFG005776(gb|NP_687685) (cylA) ABC (ATP-binding cassette) transporter CylA [Beta-hemolysin/cytolysin (CVF171)] [Streptococcus agalactiae 2603V/R]	98	33.442	2.98e-34
FHG68_RS09385	VFG000130(gb|NP_252238) (algI) alginate o-acetyltransferase AlgI [Alginate (VF0091)] [Pseudomonas aeruginosa PAO1]	75	34.722	1.44e-69
FHG68_RS09415	VFG001965(gb|NP_282578) (Cj1437c) aminotransferase [Capsule (VF0323)] [Campylobacter jejuni subsp. jejuni NCTC 11168]	49	27.751	1.22e-07
FHG68_RS09465	VFG018238(gb|NP_232914) (cqsA) CAI-1 autoinducer synthase [CAI-1 (VF0405)] [Vibrio cholerae O1 biovar El Tor str. N16961]	92	26.184	4.11e-32
FHG68_RS09475	VFG016046(gb|NP_251103) (pvdH) diaminobutyrate-2-oxoglutarate aminotransferase PvdH [pyoverdine (IA001)] [Pseudomonas aeruginosa PAO1]	93	24.413	4.03e-27
FHG68_RS09510	VFG038710(gb|YP_855925) (cheB-2) chemotaxis-specific methylesterase [ND (AI144)] [Aeromonas hydrophila subsp. hydrophila ATCC 7966]	76	35.238	4.05e-11
FHG68_RS09520	VFG016046(gb|NP_251103) (pvdH) diaminobutyrate-2-oxoglutarate aminotransferase PvdH [pyoverdine (IA001)] [Pseudomonas aeruginosa PAO1]	90	29.952	3.14e-45
FHG68_RS09525	VFG013327(gb|NP_438900) (yhxB/manB) phosphomannomutase [LOS (CVF494)] [Haemophilus influenzae Rd KW20]	96	34.483	1.46e-88
FHG68_RS09535	VFG001964(gb|NP_282577) (Cj1436c) aminotransferase [Capsule (VF0323)] [Campylobacter jejuni subsp. jejuni NCTC 11168]	76	22.68	3.83e-09
FHG68_RS09595	VFG000031(gb|NP_878988) (bplH) putative glycosyl transferase [LPS (VF0033)] [Bordetella pertussis Tohama I]	88	22.829	4.08e-17
FHG68_RS09600	VFG013276(gb|NP_438430) (opsX/rfaC) heptosyltransferase I [LOS (CVF494)] [Haemophilus influenzae Rd KW20]	86	22.581	1.35e-14
FHG68_RS09620	VFG016058(gb|NP_251114) (pvdL) peptide synthase PvdL [pyoverdine (IA001)] [Pseudomonas aeruginosa PAO1]	52	26.176	7.17e-13
FHG68_RS09750	VFG038831(gb|YP_857806) (pomB2) flagellar motor protein MotB [Polar flagella (CVF786)] [Aeromonas hydrophila subsp. hydrophila ATCC 7966]	42	34.507	5.74e-26
FHG68_RS09770	VFG038234(gb|YP_001845365) (bfmS) signal transduction histidine kinase [BfmRS (VF0463)] [Acinetobacter baumannii ACICU]	29	26.531	1.05e-20
FHG68_RS09775	VFG038759(gb|YP_857329) (fleS/flrB) two-component sensor kinase [ND (AI144)] [Aeromonas hydrophila subsp. hydrophila ATCC 7966]	65	26.482	2.43e-20
FHG68_RS09805	VFG045566(gb|YP_096368) (lpg2359) Dot/Icm type IV secretion system effector [Dot/Icm (VF0156)] [Legionella pneumophila subsp. pneumophila str. Philadelphia 1]	100	34.667	1.44e-20
FHG68_RS09815	VFG038694(gb|YP_855921) (fliA) flagellar biosynthesis sigma factor [ND (AI144)] [Aeromonas hydrophila subsp. hydrophila ATCC 7966]	36	28	1.36e-11
FHG68_RS09845	VFG000358(gb|NP_405467) (fyuA) pesticin/yersiniabactin receptor protein [Yersiniabactin (VF0136)] [Yersinia pestis CO92]	17	30.496	2.53e-14
FHG68_RS09860	VFG002037(gb|AAA24685) (eltA) heat-labile enterotoxin A prepeptide (from human) [Heat-labile toxin (LT) (VF0210)] [Escherichia coli]	30	29.464	6.11e-13
FHG68_RS09875	VFG046167(gb|YP_002305089.1) (CbuK_0688) Coxiella Dot/Icm type IVB secretion system translocated effector [T4SS effectors (CVF803)] [Coxiella burnetii CbuK_Q154]	25	47.761	5.01e-22
FHG68_RS10125	VFG001269(gb|NP_879579) (cyaB) cyclolysin secretion ATP-binding protein [Cya (VF0028)] [Bordetella pertussis Tohama I]	10	36.957	7.37e-08
FHG68_RS10170	VFG000130(gb|NP_252238) (algI) alginate o-acetyltransferase AlgI [Alginate (VF0091)] [Pseudomonas aeruginosa PAO1]	74	38.503	3.66e-73
FHG68_RS10205	VFG039262(gb|YP_001596115) (ankB) Coxiella Dot/Icm type IVB secretion system translocated effector, ankyrin repeat-containing protein [T4SS effectors (CVF803)] [Coxiella burnetii RSA 331]	62	30	6.32e-19
FHG68_RS10300	VFG002325(gb|YP_001006732) (fliS) flagellar protein FliS [Flagella (VF0394)] [Yersinia enterocolitica subsp. enterocolitica 8081]	71	35.135	2.37e-15
FHG68_RS10305	VFG002230(gb|NP_540335) (wbkC) GDP-mannose 4,6-dehydratase / GDP-4-amino-4,6-dideoxy-D-mannose formyltransferase [LPS (VF0367)] [Brucella melitensis bv. 1 str. 16M]	57	28.455	5.28e-12
FHG68_RS10335	VFG000130(gb|NP_252238) (algI) alginate o-acetyltransferase AlgI [Alginate (VF0091)] [Pseudomonas aeruginosa PAO1]	85	32.933	6.55e-61
FHG68_RS10395	VFG005767(gb|NP_687682) (cylG) 3-ketoacyl-ACP-reductase CylG [Beta-hemolysin/cytolysin (CVF171)] [Streptococcus agalactiae 2603V/R]	80	25.946	1.93e-14
FHG68_RS10400	VFG013412(gb|NP_439302) (lpxC) UDP-3-O-(R-3-hydroxymyristoyl)-N-acetylglucosamine deacetylase [LOS (CVF494)] [Haemophilus influenzae Rd KW20]	95	39.175	4.15e-65
FHG68_RS10415	VFG000161(gb|NP_251089) (pvdD) pyoverdine synthetase D [Pyoverdine (VF0094)] [Pseudomonas aeruginosa PAO1]	29	23.232	1.92e-08
FHG68_RS10430	VFG002224(gb|NP_540321) (wbkA) mannosyltransferase [LPS (VF0367)] [Brucella melitensis bv. 1 str. 16M]	82	29.697	6.23e-36
FHG68_RS10465	VFG037118(gb|NP_273782) (recN) DNA repair protein RecN [RecN (VF0457)] [Neisseria meningitidis MC58]	99	31.504	7.72e-87
FHG68_RS10475	VFG005767(gb|NP_687682) (cylG) 3-ketoacyl-ACP-reductase CylG [Beta-hemolysin/cytolysin (CVF171)] [Streptococcus agalactiae 2603V/R]	97	30.709	6.06e-35
FHG68_RS10485	VFG000332(gb|NP_439271) (rfaD) ADP-L-glycero-D-mannoheptose-6-epimerase [LOS (VF0044)] [Haemophilus influenzae Rd KW20]	97	41.139	3.05e-70
FHG68_RS10530	VFG011850(gb|NP_281278) (flhG) ATP-binding protein [Flagella (CVF397)] [Campylobacter jejuni subsp. jejuni NCTC 11168]	49	32.432	2.37e-15
FHG68_RS10565	VFG000871(gb|NP_757239) (fimB) Type 1 fimbriae Regulatory protein fimB [Type 1 fimbriae (VF0221)] [Escherichia coli CFT073]	50	24.224	9.86e-11
FHG68_RS10670	VFG000180(gb|NP_251791) (xcpT) general secretion pathway protein G [xcp secretion system (VF0084)] [Pseudomonas aeruginosa PAO1]	91	41.379	7.68e-26
FHG68_RS10675	VFG038280(gb|YP_855104) (exeF) general secretion pathway protein F [exe (SS209)] [Aeromonas hydrophila subsp. hydrophila ATCC 7966]	99	31.266	1.82e-74
FHG68_RS10680	VFG002048(gb|YP_404601) (gspE) general secretion pathway protein E [T2SS (VF0333)] [Shigella dysenteriae Sd197]	85	47.521	3.54e-153
FHG68_RS10685	VFG002047(gb|YP_404600) (gspD) general secretion pathway protein D [T2SS (VF0333)] [Shigella dysenteriae Sd197]	80	30.268	8.84e-60
FHG68_RS10695	VFG000145(gb|NP_250562) (lasA) LasA protease precursor [LasA (VF0088)] [Pseudomonas aeruginosa PAO1]	19	36.62	3.79e-08
FHG68_RS10725	VFG002013(gb|YP_095812) (flhB) flagellar biosynthetic protein FlhB [Flagella (VF0157)] [Legionella pneumophila subsp. pneumophila str. Philadelphia 1]	98	35.165	1.35e-10
FHG68_RS10775	VFG002230(gb|NP_540335) (wbkC) GDP-mannose 4,6-dehydratase / GDP-4-amino-4,6-dideoxy-D-mannose formyltransferase [LPS (VF0367)] [Brucella melitensis bv. 1 str. 16M]	54	25.146	3.37e-09
FHG68_RS10790	VFG043345(gb|YP_095788) (fleR/flrC) sigma 54-dependent response regulator [polar flagella (AI149)] [Legionella pneumophila subsp. pneumophila str. Philadelphia 1]	97	39.545	3.19e-101
FHG68_RS10795	VFG038234(gb|YP_001845365) (bfmS) signal transduction histidine kinase [BfmRS (VF0463)] [Acinetobacter baumannii ACICU]	49	23.701	2.42e-14
FHG68_RS10810	VFG043396(gb|YP_002344093) (rpoN) RNA polymerase factor sigma-54 [Pse5Ac7Ac, Pse5Ac7Am, Pse8OAc, Pse5Am7AcGlnAc (AI151)] [Campylobacter jejuni subsp. jejuni NCTC 11168]	71	28.869	2.24e-39
FHG68_RS10815	VFG000344(gb|NP_438273) (hitC) iron(III) ABC transporter, ATP-binding protein [HitABC (VF0268)] [Haemophilus influenzae Rd KW20]	100	30	1.02e-31
FHG68_RS10830	VFG013465(gb|NP_439706) (kdsA) 2-dehydro-3-deoxyphosphooctonate aldolase [LOS (CVF494)] [Haemophilus influenzae Rd KW20]	91	43.866	4.97e-84
FHG68_RS10840	VFG002027(gb|NP_282297) (hldE) bifunctional D-beta-D-heptose 7-phosphate kinase/D-beta-D-heptose 1-phosphate adenylyltransferase [LOS (VF0326)] [Campylobacter jejuni subsp. jejuni NCTC 11168]	82	55.814	3.63e-42
FHG68_RS10845	VFG000331(gb|NP_439675) (rfaE) ADP-heptose synthase [LOS (VF0044)] [Haemophilus influenzae Rd KW20]	95	40.752	1.61e-69
FHG68_RS10855	VFG000070(gb|NP_464110) (iap/cwhA) P60 extracellular protein, invasion associated protein Iap [p60 (VF0068)] [Listeria monocytogenes EGD-e]	26	30.357	3.12e-08
FHG68_RS10860	VFG001857(gb|YP_094782) (iraB) Di/tripeptide permease [IraAB (VF0293)] [Legionella pneumophila subsp. pneumophila str. Philadelphia 1]	91	25.11	8.28e-32
FHG68_RS10870	VFG038734(gb|YP_856235) (flaB) flagellin [ND (AI144)] [Aeromonas hydrophila subsp. hydrophila ATCC 7966]	98	34.868	5.68e-51
FHG68_RS10875	VFG038734(gb|YP_856235) (flaB) flagellin [ND (AI144)] [Aeromonas hydrophila subsp. hydrophila ATCC 7966]	99	35.505	7.58e-52
FHG68_RS10885	VFG009810(gb|NP_215272) (phoR) Possible two component system response sensor kinase membrane associated PhoR [PhoP/R (CVF331)] [Mycobacterium tuberculosis H37Rv]	31	30	7.42e-22
FHG68_RS10890	VFG001249(gb|NP_249790) (fleR) two-component response regulator [Flagella (VF0273)] [Pseudomonas aeruginosa PAO1]	27	34.783	1.97e-10
FHG68_RS10895	VFG002532(gb|YP_109903) (cheY1) chemotaxis two-component response regulator CheY1 [Flagella (VF0430)] [Burkholderia pseudomallei K96243]	94	34.513	6.9e-24
FHG68_RS10905	VFG043211(gb|YP_001006780) (cheA) chemotaxis protein CheA [peritrichous flagella (AI145)] [Yersinia enterocolitica subsp. enterocolitica 8081]	97	30.791	4.48e-93
FHG68_RS10910	VFG043209(gb|YP_001006778) (cheD) methyl-accepting chemotaxis protein CheD [peritrichous flagella (AI145)] [Yersinia enterocolitica subsp. enterocolitica 8081]	26	39.925	6.04e-53
FHG68_RS10915	VFG002530(gb|YP_109901) (cheW) chemotaxis protein CheW [Flagella (VF0430)] [Burkholderia pseudomallei K96243]	90	34.641	3.75e-31
FHG68_RS10920	VFG002527(gb|YP_109898) (cheD) chemoreceptor glutamine deamidase CheD [Flagella (VF0430)] [Burkholderia pseudomallei K96243]	92	29.677	5.48e-21
FHG68_RS10925	VFG043207(gb|YP_001006775) (cheB) chemotaxis-specific methylesterase CheB [peritrichous flagella (AI145)] [Yersinia enterocolitica subsp. enterocolitica 8081]	99	46.957	5.99e-116
FHG68_RS10970	VFG049144(gb|YP_002918165.1) (acrB) acriflavine resistance protein B [AcrAB (VF0568)] [Klebsiella pneumoniae subsp. pneumoniae NTUH-K2044]	94	21.949	1.61e-53
FHG68_RS11055	VFG001206(gb|NP_273675) (fbpC) iron(III) ABC transporter, ATP-binding protein [FbpABC (VF0272)] [Neisseria meningitidis MC58]	73	30.303	6.95e-22
FHG68_RS11145	VFG000574(gb|NP_462662) (mgtB) Mg2+ transport protein [MgtBC (VF0106)] [Salmonella enterica subsp. enterica serovar Typhimurium str. LT2]	19	31.447	7.54e-11
FHG68_RS11190	VFG048229(gb|YP_002921134.1) (fimB) tyrosine recombinase [Type I fimbriae (VF0566)] [Klebsiella pneumoniae subsp. pneumoniae NTUH-K2044]	57	31.176	4.05e-20
FHG68_RS11205	VFG000130(gb|NP_252238) (algI) alginate o-acetyltransferase AlgI [Alginate (VF0091)] [Pseudomonas aeruginosa PAO1]	85	35.422	2.96e-78
FHG68_RS11390	VFG038734(gb|YP_856235) (flaB) flagellin [ND (AI144)] [Aeromonas hydrophila subsp. hydrophila ATCC 7966]	99	34.754	2.58e-53
FHG68_RS11400	VFG038734(gb|YP_856235) (flaB) flagellin [ND (AI144)] [Aeromonas hydrophila subsp. hydrophila ATCC 7966]	99	36.721	1.71e-52
FHG68_RS11410	VFG039262(gb|YP_001596115) (ankB) Coxiella Dot/Icm type IVB secretion system translocated effector, ankyrin repeat-containing protein [T4SS effectors (CVF803)] [Coxiella burnetii RSA 331]	58	28.364	3.92e-10
FHG68_RS11430	VFG009810(gb|NP_215272) (phoR) Possible two component system response sensor kinase membrane associated PhoR [PhoP/R (CVF331)] [Mycobacterium tuberculosis H37Rv]	46	27.826	5.02e-15
FHG68_RS11435	VFG038219(gb|YP_001845364) (bfmR) biofilm-controlling response regulator [BfmRS (VF0463)] [Acinetobacter baumannii ACICU]	95	35.294	7.06e-36
FHG68_RS11465	VFG006562(gb|NP_207150) (fliG) flagellar motor switch protein G [Pse5Ac7Ac (AI150)] [Helicobacter pylori 26695]	96	31.173	5.23e-48
FHG68_RS11470	VFG046167(gb|YP_002305089.1) (CbuK_0688) Coxiella Dot/Icm type IVB secretion system translocated effector [T4SS effectors (CVF803)] [Coxiella burnetii CbuK_Q154]	38	46.212	8.41e-21
FHG68_RS11550	VFG001287(gb|NP_647405) (icaB) N-deacetylase, involved in polysaccharide intercellular adhesin(PIA) synthesis [Intercellular adhesion proteins (VF0014)] [Staphylococcus aureus subsp. aureus MW2]	69	28.436	1.78e-16
FHG68_RS11555	VFG037678(gb|YP_001847021) (pgaC) poly-beta-1,6 N-acetyl-D-glucosamine synthase [PNAG (VF0472)] [Acinetobacter baumannii ACICU]	25	27.749	2.39e-07
FHG68_RS11595	VFG045607(gb|YP_096929) (lpg2936) Dot/Icm type IV secretion system effector [Dot/Icm (VF0156)] [Legionella pneumophila subsp. pneumophila str. Philadelphia 1]	91	28.07	6.81e-14
FHG68_RS11615	VFG045467(gb|YP_107884) (cdpA) cyclic di-GMP phosphodiesterase [CdpA (VF0432)] [Burkholderia pseudomallei K96243]	60	25.67	7.47e-13
FHG68_RS11665	VFG002550(gb|YP_109386) (wcbP) capsular polysaccharide biosynthesis dehydrogenase/reductase [Capsule I (VF0436)] [Burkholderia pseudomallei K96243]	96	27.5	1.85e-15
FHG68_RS11680	VFG000670(gb|NP_706258) (gtrB) bactoprenol glucosyl transferase [LPS (VF0124)] [Shigella flexneri 2a str. 301]	36	32.432	7.91e-11
FHG68_RS11690	VFG036992(gb|NP_274718) (mtrD) multiple transferable resistance system protein MtrD [MtrCDE (VF0451)] [Neisseria meningitidis MC58]	93	21.389	3.6e-56
FHG68_RS11700	VFG049133(gb|YP_002918166.1) (acrA) acriflavine resistance protein A [AcrAB (VF0568)] [Klebsiella pneumoniae subsp. pneumoniae NTUH-K2044]	34	30.088	6.74e-07
FHG68_RS11755	VFG000077(gb|NP_465991) (clpP) ATP-dependent Clp protease proteolytic subunit [ClpP (VF0074)] [Listeria monocytogenes EGD-e]	87	44.186	1.58e-50
FHG68_RS11780	VFG001386(gb|NP_215271) (phoP) Possible two component system response transcriptional positive regulator PhoP [PhoP (VF0286)] [Mycobacterium tuberculosis H37Rv]	80	28	2.19e-10
FHG68_RS11860	VFG049152(gb|YP_006635478.1) (clbF) colibactin biosynthesis dehydrogenase ClbF [Colibactin (VF0573)] [Klebsiella pneumoniae subsp. pneumoniae 1084]	84	26.074	2.08e-28
FHG68_RS11930	VFG039454(gb|NP_820212) (coxU2) Coxiella Dot/Icm type IVB secretion system translocated effector [Dot/Icm (SS051)] [Coxiella burnetii RSA 493]	50	29.74	4.11e-18
FHG68_RS11940	VFG037028(gb|NP_273273) (katA) catalase [KatA (VF0454)] [Neisseria meningitidis MC58]	99	55.901	0
FHG68_RS11960	VFG002513(gb|YP_106902) (flgG) flagellar basal body rod protein FlgG [Flagella (VF0430)] [Burkholderia pseudomallei K96243]	97	33.216	3.07e-34
FHG68_RS12185	VFG001226(gb|NP_249100) (pilH) twitching motility protein PilH [Type IV pili (VF0082)] [Pseudomonas aeruginosa PAO1]	24	30.252	1.51e-08
FHG68_RS12195	VFG000079(gb|NP_463763) (clpC) endopeptidase Clp ATP-binding chain C [ClpC (VF0072)] [Listeria monocytogenes EGD-e]	99	45.8	0
FHG68_RS12240	VFG002319(gb|YP_001006726) (fliA) flagellar biosynthesis sigma factor [Flagella (VF0394)] [Yersinia enterocolitica subsp. enterocolitica 8081]	86	41.667	6.18e-58
FHG68_RS12250	VFG043350(gb|YP_095809) (fleN) flagellar synthesis regulator FleN [polar flagella (AI149)] [Legionella pneumophila subsp. pneumophila str. Philadelphia 1]	94	39.161	1.19e-68
FHG68_RS12255	VFG006582(gb|NP_207825) (flhF) flagellar biosynthesis protein [Pse5Ac7Ac (AI150)] [Helicobacter pylori 26695]	58	33.725	7.41e-35
FHG68_RS12260	VFG038682(gb|YP_855918) (flhA) flagellar biosynthesis protein FlhA [ND (AI144)] [Aeromonas hydrophila subsp. hydrophila ATCC 7966]	96	40.32	1.87e-157
FHG68_RS12265	VFG001262(gb|NP_250140) (flhB) flagellar biosynthetic protein FlhB [Flagella (VF0273)] [Pseudomonas aeruginosa PAO1]	70	37.5	3.45e-56
FHG68_RS12270	VFG001918(gb|NP_282326) (fliR) flagellar biosynthetic protein FliR [Flagella (VF0114)] [Campylobacter jejuni subsp. jejuni NCTC 11168]	85	34.545	1.95e-32
FHG68_RS12275	VFG002339(gb|YP_001006752) (fliQ) flagellar biosynthetic protein FliQ [Flagella (VF0394)] [Yersinia enterocolitica subsp. enterocolitica 8081]	93	45.679	3.82e-14
FHG68_RS12280	VFG038666(gb|YP_855914) (fliP) flagellar biosynthesis protein FliP [ND (AI144)] [Aeromonas hydrophila subsp. hydrophila ATCC 7966]	82	53.023	1.92e-71
FHG68_RS12290	VFG002492(gb|YP_106653) (fliN) flagellar motor switch protein FliN [Flagella (VF0430)] [Burkholderia pseudomallei K96243]	27	51.579	3.8e-30
FHG68_RS12325	VFG005767(gb|NP_687682) (cylG) 3-ketoacyl-ACP-reductase CylG [Beta-hemolysin/cytolysin (CVF171)] [Streptococcus agalactiae 2603V/R]	72	30	1.2e-24
FHG68_RS12690	VFG049152(gb|YP_006635478.1) (clbF) colibactin biosynthesis dehydrogenase ClbF [Colibactin (VF0573)] [Klebsiella pneumoniae subsp. pneumoniae 1084]	61	28.056	2.44e-32
FHG68_RS12750	VFG049158(gb|YP_006635484.1) (clbL) colibactin biosynthesis amidase ClbL [Colibactin (VF0573)] [Klebsiella pneumoniae subsp. pneumoniae 1084]	42	30.732	4.65e-16
FHG68_RS12760	VFG048841(gb|YP_002920354.1) (wcaJ) undecaprenyl-phosphate glucose phosphotransferase [Capsule (VF0560)] [Klebsiella pneumoniae subsp. pneumoniae NTUH-K2044]	71	39.233	1.45e-62
FHG68_RS12815	VFG038698(gb|YP_855922) (cheY) chemotaxis protein CheY [ND (AI144)] [Aeromonas hydrophila subsp. hydrophila ATCC 7966]	35	28.205	1.91e-11
FHG68_RS12835	VFG038219(gb|YP_001845364) (bfmR) biofilm-controlling response regulator [BfmRS (VF0463)] [Acinetobacter baumannii ACICU]	21	33.333	2.39e-09
FHG68_RS12850	VFG041304(gb|YP_095978) (lirB) Dot/Icm type IV secretion system effector LirB [Dot/Icm (SS047)] [Legionella pneumophila subsp. pneumophila str. Philadelphia 1]	99	46.667	3.89e-42
FHG68_RS12870	VFG037386(gb|YP_001847242) (bauE) ferric siderophore ABC transporter, ATP-binding protein BauE [Acinetobactin (VF0467)] [Acinetobacter baumannii ACICU]	30	25.943	2.52e-16
FHG68_RS12885	VFG009810(gb|NP_215272) (phoR) Possible two component system response sensor kinase membrane associated PhoR [PhoP/R (CVF331)] [Mycobacterium tuberculosis H37Rv]	25	27.018	7.72e-16
FHG68_RS12910	VFG043346(gb|YP_095789) (fleS/flrB) flagellar sensor histidine kinase FleS [polar flagella (AI149)] [Legionella pneumophila subsp. pneumophila str. Philadelphia 1]	65	26.21	8.55e-16
FHG68_RS12915	VFG001864(gb|YP_094827) (mip) macrophage infectivity potentiator Mip [Mip (VF0153)] [Legionella pneumophila subsp. pneumophila str. Philadelphia 1]	86	36.036	5.86e-16
FHG68_RS12965	VFG000077(gb|NP_465991) (clpP) ATP-dependent Clp protease proteolytic subunit [ClpP (VF0074)] [Listeria monocytogenes EGD-e]	96	61.579	1.84e-89
FHG68_RS12990	VFG000919(gb|NP_756176) (chuW) Putative oxygen independent coproporphyrinogen III oxidase [Chu (VF0227)] [Escherichia coli CFT073]	74	24.315	3.17e-23
FHG68_RS13020	VFG001228(gb|NP_249102) (pilJ) twitching motility protein PilJ [Type IV pili (VF0082)] [Pseudomonas aeruginosa PAO1]	45	24.808	1.19e-24
FHG68_RS13050	VFG001859(gb|YP_096662) (feoB) ferrous iron transporter B [FeoAB (VF0160)] [Legionella pneumophila subsp. pneumophila str. Philadelphia 1]	97	28.571	1.31e-88
FHG68_RS13060	VFG001338(gb|NP_688170) (neuB) N-acetyl neuramic acid synthetase NeuB [Capsule (VF0274)] [Streptococcus agalactiae 2603V/R]	81	36.918	2.87e-56
FHG68_RS13080	VFG006557(gb|NP_207149) (fliF) flagellar M-ring protein FliF [Pse5Ac7Ac (AI150)] [Helicobacter pylori 26695]	98	26.962	1.08e-39
FHG68_RS13085	VFG038865(gb|YP_001140286) (fliG) flagellar motor switch protein G [Lateral flagella (VF0474)] [Aeromonas salmonicida subsp. salmonicida A449]	96	24.383	2.03e-20
FHG68_RS13090	VFG002130(gb|NP_220076) (cdsL) type III secretion translocase [TTSS (VF0344)] [Chlamydia trachomatis D/UW-3/CX]	62	25.131	1.04e-14
FHG68_RS13095	VFG002144(gb|NP_220188) (cdsN) Type III secretion system ATPase [TTSS (VF0344)] [Chlamydia trachomatis D/UW-3/CX]	92	49.883	2.3e-136
FHG68_RS13185	VFG000330(gb|NP_438812) (kdtA) 3-deoxy-d-manno-octulosonic-acid transferase [LOS (VF0044)] [Haemophilus influenzae Rd KW20]	86	25.132	7.18e-25
FHG68_RS13315	VFG000122(gb|NP_252230) (algD) GDP-mannose 6-dehydrogenase AlgD [Alginate (VF0091)] [Pseudomonas aeruginosa PAO1]	81	35.359	3.2e-62
FHG68_RS13320	VFG049084(gb|YP_002920347.1) (wzt) lipopolysaccharide O-antigen ABC transport system ATP-binding component [LPS (VF0561)] [Klebsiella pneumoniae subsp. pneumoniae NTUH-K2044]	48	45.366	4.97e-56
FHG68_RS13465	VFG043402(gb|YP_002344511) (cheY) chemotaxis regulatory protein [Pse5Ac7Ac, Pse5Ac7Am, Pse8OAc, Pse5Am7AcGlnAc (AI151)] [Campylobacter jejuni subsp. jejuni NCTC 11168]	98	33.871	1.86e-16
FHG68_RS13470	VFG002526(gb|YP_109897) (cheB) chemotaxis-specific methylesterase [Flagella (VF0430)] [Burkholderia pseudomallei K96243]	98	39.326	3.55e-84
FHG68_RS13475	VFG043394(gb|YP_002343725) (cheA) chemotaxis histidine kinase [Pse5Ac7Ac, Pse5Ac7Am, Pse8OAc, Pse5Am7AcGlnAc (AI151)] [Campylobacter jejuni subsp. jejuni NCTC 11168]	37	42.64	6.09e-102
FHG68_RS13480	VFG043204(gb|YP_855930) (cheW-2) chemotaxis protein CheW [ND (AI144)] [Aeromonas hydrophila subsp. hydrophila ATCC 7966]	84	29.71	2.68e-22
FHG68_RS13615	VFG002158(gb|NP_464456) (lplA1) lipoate protein ligase [LplA1 (VF0347)] [Listeria monocytogenes EGD-e]	36	38.182	3.32e-12
FHG68_RS13660	VFG048409(gb|YP_002918380.1) (entA) 2,3-dihydroxybenzoate-2,3-dehydrogenase [Ent (VF0562)] [Klebsiella pneumoniae subsp. pneumoniae NTUH-K2044]	84	27.778	6.06e-21
FHG68_RS13680	VFG000930(gb|NP_752604) (entF) enterobactin synthase multienzyme complex component, ATP-dependent [Enterobactin (VF0228)] [Escherichia coli CFT073]	36	25.105	1.4e-10
FHG68_RS13690	VFG000075(gb|NP_463962) (inlA) Internalin A [InlA (VF0069)] [Listeria monocytogenes EGD-e]	39	27.982	2.23e-21
FHG68_RS13695	VFG015521(gb|NP_252906) (phzG1) phenazine biosynthesis protein PhzG, pyridoxamine 5'-phosphate oxidase [Phenazines biosynthesis (CVF536)] [Pseudomonas aeruginosa PAO1]	89	29.843	1.39e-25
FHG68_RS13705	VFG002060(gb|NP_248764) (ppkA) serine/threonine protein kinase PpkA [HSI-I (VF0334)] [Pseudomonas aeruginosa PAO1]	15	24.82	1.61e-11
FHG68_RS13725	VFG001206(gb|NP_273675) (fbpC) iron(III) ABC transporter, ATP-binding protein [FbpABC (VF0272)] [Neisseria meningitidis MC58]	73	36.466	8.65e-55
FHG68_RS13730	VFG000249(gb|NP_273676) (fbpB) iron(III) ABC transporter, permease protein [FbpABC (VF0272)] [Neisseria meningitidis MC58]	90	25.194	1.47e-09
FHG68_RS13735	VFG000249(gb|NP_273676) (fbpB) iron(III) ABC transporter, permease protein [FbpABC (VF0272)] [Neisseria meningitidis MC58]	68	29.442	1.25e-09
FHG68_RS13815	VFG002409(gb|NP_645079) (essC) type VII secretion system protein EssC, FtsK/SpoIIIE family ATPase [Type VII secretion system (VF0403)] [Staphylococcus aureus subsp. aureus MW2]	22	32.864	1.31e-19
FHG68_RS13825	VFG000107(gb|NP_231100) (ctxA) cholera enterotoxin, A subunit [CT (VF0128)] [Vibrio cholerae O1 biovar El Tor str. N16961]	26	34.536	1.63e-19
FHG68_RS13840	VFG000130(gb|NP_252238) (algI) alginate o-acetyltransferase AlgI [Alginate (VF0091)] [Pseudomonas aeruginosa PAO1]	67	38.484	7.27e-73
FHG68_RS13880	VFG000359(gb|NP_405468) (ybtE) yersiniabactin siderophore biosynthetic protein [Yersiniabactin (VF0136)] [Yersinia pestis CO92]	91	26.68	1.37e-40
FHG68_RS13900	VFG002059(gb|NP_248763) (tagT) type six secretion associated protein TagT, ATP-binding component of ABC transporter [HSI-I (VF0334)] [Pseudomonas aeruginosa PAO1]	93	35.78	2.15e-29
FHG68_RS13925	VFG043346(gb|YP_095789) (fleS/flrB) flagellar sensor histidine kinase FleS [polar flagella (AI149)] [Legionella pneumophila subsp. pneumophila str. Philadelphia 1]	19	28.448	8.87e-10
FHG68_RS13940	VFG044329(gb|YP_002920249) (irp1) yersiniabactin polyketide synthase HMWP1 [Ybt (VF0564)] [Klebsiella pneumoniae subsp. pneumoniae NTUH-K2044]	97	23.094	5.92e-20
FHG68_RS13950	VFG002061(gb|NP_248765) (pppA) Pseudomonas protein phosphatase PppA [HSI-I (VF0334)] [Pseudomonas aeruginosa PAO1]	73	25.472	2.38e-11
FHG68_RS13955	VFG005767(gb|NP_687682) (cylG) 3-ketoacyl-ACP-reductase CylG [Beta-hemolysin/cytolysin (CVF171)] [Streptococcus agalactiae 2603V/R]	97	32.794	7.66e-39
FHG68_RS13975	VFG002060(gb|NP_248764) (ppkA) serine/threonine protein kinase PpkA [HSI-I (VF0334)] [Pseudomonas aeruginosa PAO1]	15	24.286	3.96e-20
FHG68_RS14095	VFG000121(gb|NP_249453) (algU) alginate biosynthesis protein AlgZ/FimS [Alginate (VF0091)] [Pseudomonas aeruginosa PAO1]	79	35.088	1.68e-29
FHG68_RS14105	VFG000130(gb|NP_252238) (algI) alginate o-acetyltransferase AlgI [Alginate (VF0091)] [Pseudomonas aeruginosa PAO1]	78	39.737	1.49e-82
FHG68_RS14150	VFG002529(gb|YP_109900) (tsr) methyl-accepting chemotaxis protein I [Flagella (VF0430)] [Burkholderia pseudomallei K96243]	40	26.95	1.41e-26
FHG68_RS14155	VFG011946(gb|NP_282174) (flgR) sigma-54 associated transcriptional activator [Pse5Ac7Ac, Pse5Ac7Am, Pse8OAc, Pse5Am7AcGlnAc (AI151)] [Campylobacter jejuni subsp. jejuni NCTC 11168]	54	40.845	4.36e-07
FHG68_RS14160	VFG045467(gb|YP_107884) (cdpA) cyclic di-GMP phosphodiesterase [CdpA (VF0432)] [Burkholderia pseudomallei K96243]	51	22.33	1.88e-16
FHG68_RS14180	VFG001965(gb|NP_282578) (Cj1437c) aminotransferase [Capsule (VF0323)] [Campylobacter jejuni subsp. jejuni NCTC 11168]	87	26.113	8.99e-20
FHG68_RS14205	VFG046167(gb|YP_002305089.1) (CbuK_0688) Coxiella Dot/Icm type IVB secretion system translocated effector [T4SS effectors (CVF803)] [Coxiella burnetii CbuK_Q154]	34	44.526	1.25e-23
FHG68_RS14295	VFG046167(gb|YP_002305089.1) (CbuK_0688) Coxiella Dot/Icm type IVB secretion system translocated effector [T4SS effectors (CVF803)] [Coxiella burnetii CbuK_Q154]	40	44.697	1.35e-19
FHG68_RS14300	VFG046167(gb|YP_002305089.1) (CbuK_0688) Coxiella Dot/Icm type IVB secretion system translocated effector [T4SS effectors (CVF803)] [Coxiella burnetii CbuK_Q154]	21	45.588	8.22e-21
FHG68_RS14305	VFG046167(gb|YP_002305089.1) (CbuK_0688) Coxiella Dot/Icm type IVB secretion system translocated effector [T4SS effectors (CVF803)] [Coxiella burnetii CbuK_Q154]	37	46.97	9.05e-23
FHG68_RS14320	VFG041248(gb|YP_094446) (ankY/legA9) Dot/Icm type IV secretion system effector LegA9/AnkY, ankyrin repeat-containing protein targeting the LCV for autophagy uptake [Dot/Icm (SS047)] [Legionella pneumophila subsp. pneumophila str. Philadelphia 1]	48	36.792	6.47e-10
FHG68_RS14330	VFG000262(gb|NP_273508) (tbpA) transferrin-binding protein A [Tbp (VF0046)] [Neisseria meningitidis MC58]	13	32.381	1.05e-07
FHG68_RS14360	VFG000680(gb|AAF13661) (capA) CapA, required for Poly-gamma-glutamate transport [Capsule (VF0141)] [Bacillus anthracis]	66	28.516	1.23e-23
FHG68_RS14370	VFG009810(gb|NP_215272) (phoR) Possible two component system response sensor kinase membrane associated PhoR [PhoP/R (CVF331)] [Mycobacterium tuberculosis H37Rv]	49	26.36	2.28e-17
FHG68_RS14375	VFG043386(gb|NP_207858) (cheY) chemotaxis response regulator CheY [Pse5Ac7Ac (AI150)] [Helicobacter pylori 26695]	71	26.168	3.12e-12
FHG68_RS14505	VFG046167(gb|YP_002305089.1) (CbuK_0688) Coxiella Dot/Icm type IVB secretion system translocated effector [T4SS effectors (CVF803)] [Coxiella burnetii CbuK_Q154]	46	32.353	9.86e-07
FHG68_RS14550	VFG013384(gb|NP_439218) (lpxB) lipid-A-disaccharide synthase [LOS (CVF494)] [Haemophilus influenzae Rd KW20]	89	33.503	7.53e-68
FHG68_RS14580	VFG001249(gb|NP_249790) (fleR) two-component response regulator [Flagella (VF0273)] [Pseudomonas aeruginosa PAO1]	29	28.972	2.05e-11
FHG68_RS14635	VFG014950(gb|NP_249457) (mucD) serine protease MucD precursor [Alginate regulation (CVF523)] [Pseudomonas aeruginosa PAO1]	73	39.259	1.12e-49
FHG68_RS14665	VFG000670(gb|NP_706258) (gtrB) bactoprenol glucosyl transferase [LPS (VF0124)] [Shigella flexneri 2a str. 301]	92	34.853	9.98e-71
FHG68_RS14700	VFG048459(gb|YP_002918375.1) (ybdA) enterobactin exporter EntS [Ent (VF0562)] [Klebsiella pneumoniae subsp. pneumoniae NTUH-K2044]	82	23.011	2.24e-11
FHG68_RS14855	VFG037678(gb|YP_001847021) (pgaC) poly-beta-1,6 N-acetyl-D-glucosamine synthase [PNAG (VF0472)] [Acinetobacter baumannii ACICU]	58	27.273	9.68e-22
FHG68_RS15000	VFG007177(gb|NP_798078) (exsA) transcriptional regulator ExsA [T3SS1 (VF0408)] [Vibrio parahaemolyticus RIMD 2210633]	25	32.292	1.04e-08
FHG68_RS15060	VFG036974(gb|NP_274719) (mtrC) membrane fusion protein MtrC [MtrCDE (VF0451)] [Neisseria meningitidis MC58]	62	23.473	3.46e-10
FHG68_RS15095	VFG037720(gb|YP_001847164) (adeG) cation/multidrug efflux pump [AdeFGH efflux pump (VF0504)] [Acinetobacter baumannii ACICU]	99	24.645	8.81e-63
FHG68_RS15100	VFG049144(gb|YP_002918165.1) (acrB) acriflavine resistance protein B [AcrAB (VF0568)] [Klebsiella pneumoniae subsp. pneumoniae NTUH-K2044]	43	24.44	5.97e-44
FHG68_RS15195	VFG032992(gb|NP_464816) (oatA) peptidoglycan O-acetyltransferase [OatA (VF0441)] [Listeria monocytogenes EGD-e]	97	25.721	7.8e-17
FHG68_RS15215	VFG049148(gb|YP_006635474.1) (clbB) colibactin hybrid non-ribosomal peptide synthetase/type I polyketide synthase ClbB [Colibactin (VF0573)] [Klebsiella pneumoniae subsp. pneumoniae 1084]	91	29.653	8.22e-32
FHG68_RS15275	VFG038734(gb|YP_856235) (flaB) flagellin [ND (AI144)] [Aeromonas hydrophila subsp. hydrophila ATCC 7966]	89	23.784	8.63e-10
FHG68_RS15305	VFG049152(gb|YP_006635478.1) (clbF) colibactin biosynthesis dehydrogenase ClbF [Colibactin (VF0573)] [Klebsiella pneumoniae subsp. pneumoniae 1084]	65	27.945	2.96e-33
FHG68_RS15405	VFG049144(gb|YP_002918165.1) (acrB) acriflavine resistance protein B [AcrAB (VF0568)] [Klebsiella pneumoniae subsp. pneumoniae NTUH-K2044]	98	21.382	4.83e-34
FHG68_RS15435	VFG037100(gb|NP_273110) (msrA/B(pilB)) trifunctional thioredoxin/methionine sulfoxide reductase A/B protein [MsrAB (VF0456)] [Neisseria meningitidis MC58]	81	38.365	4.19e-34
FHG68_RS15490	VFG001951(gb|NP_282564) (hddC) D-glycero-D-manno-heptose 1-phosphate guanosyltransferase [Capsule (VF0323)] [Campylobacter jejuni subsp. jejuni NCTC 11168]	88	25.446	4.59e-11
FHG68_RS15500	VFG001213(gb|NP_253236) (pilS) two-component sensor PilS [Type IV pili (VF0082)] [Pseudomonas aeruginosa PAO1]	43	27.803	3.78e-19
FHG68_RS15505	VFG038759(gb|YP_857329) (fleS/flrB) two-component sensor kinase [ND (AI144)] [Aeromonas hydrophila subsp. hydrophila ATCC 7966]	48	26.649	1.98e-24
FHG68_RS15515	VFG000033(gb|NP_878990) (bplF) lipopolysaccharide biosynthesis protein [LPS (VF0033)] [Bordetella pertussis Tohama I]	98	45.343	1.68e-121
FHG68_RS15610	VFG049152(gb|YP_006635478.1) (clbF) colibactin biosynthesis dehydrogenase ClbF [Colibactin (VF0573)] [Klebsiella pneumoniae subsp. pneumoniae 1084]	84	32.11	1.32e-47
FHG68_RS15645	VFG013064(gb|YP_405019) (shuA) outer membrane heme/hemoglobin receptor ShuA [Shu (VF0256)] [Shigella dysenteriae Sd197]	15	35.294	1.09e-11
FHG68_RS15655	VFG045590(gb|YP_096633) (lpg2628) Dot/Icm type IV secretion system effector [Dot/Icm (VF0156)] [Legionella pneumophila subsp. pneumophila str. Philadelphia 1]	82	29.439	4.74e-11
FHG68_RS15665	VFG010882(gb|YP_094896) (ccmF) cytochrome c heme lyase subunit CcmF [Cytochrome c muturation (ccm) locus (CVF358)] [Legionella pneumophila subsp. pneumophila str. Philadelphia 1]	95	29.173	1.36e-69
FHG68_RS15700	VFG037100(gb|NP_273110) (msrA/B(pilB)) trifunctional thioredoxin/methionine sulfoxide reductase A/B protein [MsrAB (VF0456)] [Neisseria meningitidis MC58]	73	47.541	3.94e-31
FHG68_RS15720	VFG039536(gb|NP_820549) (CBU_1566) Coxiella Dot/Icm type IVB secretion system translocated effector [T4SS effectors (CVF803)] [Coxiella burnetii RSA 493]	95	42.678	2.59e-60
FHG68_RS15745	VFG000037(gb|NP_878994) (bplB) probable acetyltransferase [LPS (VF0033)] [Bordetella pertussis Tohama I]	52	30.159	4.61e-07
FHG68_RS15750	VFG000075(gb|NP_463962) (inlA) Internalin A [InlA (VF0069)] [Listeria monocytogenes EGD-e]	14	31.169	1.95e-14
FHG68_RS15800	VFG000104(gb|NP_230488) (acfB) accessory colonization factor AcfB [ACF (VF0127)] [Vibrio cholerae O1 biovar El Tor str. N16961]	77	25.326	1.66e-29
FHG68_RS15805	VFG000104(gb|NP_230488) (acfB) accessory colonization factor AcfB [ACF (VF0127)] [Vibrio cholerae O1 biovar El Tor str. N16961]	77	24.22	4.88e-24
FHG68_RS15850	VFG001798(gb|YP_186826) (hlb) beta-hemolysin [<beta>-hemolysin (VF0002)] [Staphylococcus aureus subsp. aureus COL]	38	40.333	3.11e-71
FHG68_RS15900	VFG002276(gb|NP_561089) (colA) collagenase [kappa-toxin (VF0388)] [Clostridium perfringens str. 13]	73	27.92	1.61e-68
FHG68_RS16105	VFG043208(gb|YP_001006776) (cheR) chemotaxis methyltransferase CheR [peritrichous flagella (AI145)] [Yersinia enterocolitica subsp. enterocolitica 8081]	95	37.319	9.03e-62
FHG68_RS16130	VFG013508(gb|NP_439858) (wecA) undecaprenyl-phosphate alpha-N-acetylglucosaminyltransferase [LOS (CVF494)] [Haemophilus influenzae Rd KW20]	63	28.631	1.31e-11
FHG68_RS16205	VFG000307(gb|NP_207041) (napA) neutrophil activating protein NapA [HP-NAP (VF0052)] [Helicobacter pylori 26695]	85	30.657	1.92e-18
FHG68_RS16220	VFG000036(gb|NP_878993) (bplC) lipopolysaccharide biosynthesis protein [LPS (VF0033)] [Bordetella pertussis Tohama I]	97	32.153	1.99e-55
FHG68_RS16285	VFG001249(gb|NP_249790) (fleR) two-component response regulator [Flagella (VF0273)] [Pseudomonas aeruginosa PAO1]	88	35.833	5.9e-09
FHG68_RS16300	VFG005767(gb|NP_687682) (cylG) 3-ketoacyl-ACP-reductase CylG [Beta-hemolysin/cytolysin (CVF171)] [Streptococcus agalactiae 2603V/R]	95	36.585	3.08e-52
FHG68_RS16310	VFG013374(gb|NP_439075) (lpxD) UDP-3-O-(3-hydroxymyristoyl) glucosamine N-acyltransferase [LOS (CVF494)] [Haemophilus influenzae Rd KW20]	93	29.206	1.56e-34
FHG68_RS16555	VFG001951(gb|NP_282564) (hddC) D-glycero-D-manno-heptose 1-phosphate guanosyltransferase [Capsule (VF0323)] [Campylobacter jejuni subsp. jejuni NCTC 11168]	44	32.773	3.56e-10
FHG68_RS16710	VFG049152(gb|YP_006635478.1) (clbF) colibactin biosynthesis dehydrogenase ClbF [Colibactin (VF0573)] [Klebsiella pneumoniae subsp. pneumoniae 1084]	83	28.399	1.88e-39
FHG68_RS16770	VFG001206(gb|NP_273675) (fbpC) iron(III) ABC transporter, ATP-binding protein [FbpABC (VF0272)] [Neisseria meningitidis MC58]	35	33.673	3.63e-21
FHG68_RS16805	VFG017856(gb|YP_001007658) (pilW) type IV fimbrial biogenesis protein PilW [Type IV pili (CVF049)] [Yersinia enterocolitica subsp. enterocolitica 8081]	95	27.184	4.53e-23
FHG68_RS16815	VFG015994(gb|NP_251084) (pvdN) pyoverdine biosynthesis protein PvdN [pyoverdine (IA001)] [Pseudomonas aeruginosa PAO1]	89	21.503	6.7e-10
FHG68_RS16830	VFG009570(gb|NP_215864) (irtA) Iron-regulated transporter IrtA [mycobactin (IA031)] [Mycobacterium tuberculosis H37Rv]	83	27.65	6.49e-15
FHG68_RS16890	VFG045531(gb|YP_095688) (lpg1661) Dot/Icm type IV secretion system effector [Dot/Icm (VF0156)] [Legionella pneumophila subsp. pneumophila str. Philadelphia 1]	98	37.24	1.34e-47
FHG68_RS16915	VFG043346(gb|YP_095789) (fleS/flrB) flagellar sensor histidine kinase FleS [polar flagella (AI149)] [Legionella pneumophila subsp. pneumophila str. Philadelphia 1]	15	33.019	2.48e-12
FHG68_RS16935	VFG049152(gb|YP_006635478.1) (clbF) colibactin biosynthesis dehydrogenase ClbF [Colibactin (VF0573)] [Klebsiella pneumoniae subsp. pneumoniae 1084]	73	28.028	2.72e-28
FHG68_RS17040	VFG043209(gb|YP_001006778) (cheD) methyl-accepting chemotaxis protein CheD [peritrichous flagella (AI145)] [Yersinia enterocolitica subsp. enterocolitica 8081]	30	27.386	3.13e-17
FHG68_RS17075	VFG049148(gb|YP_006635474.1) (clbB) colibactin hybrid non-ribosomal peptide synthetase/type I polyketide synthase ClbB [Colibactin (VF0573)] [Klebsiella pneumoniae subsp. pneumoniae 1084]	96	26.347	1.02e-19
FHG68_RS17190	VFG037720(gb|YP_001847164) (adeG) cation/multidrug efflux pump [AdeFGH efflux pump (VF0504)] [Acinetobacter baumannii ACICU]	97	22.945	2.64e-65
FHG68_RS17225	VFG045467(gb|YP_107884) (cdpA) cyclic di-GMP phosphodiesterase [CdpA (VF0432)] [Burkholderia pseudomallei K96243]	64	27.957	1.08e-47
FHG68_RS17265	VFG007177(gb|NP_798078) (exsA) transcriptional regulator ExsA [T3SS1 (VF0408)] [Vibrio parahaemolyticus RIMD 2210633]	23	31.461	5.05e-07
FHG68_RS17290	VFG049152(gb|YP_006635478.1) (clbF) colibactin biosynthesis dehydrogenase ClbF [Colibactin (VF0573)] [Klebsiella pneumoniae subsp. pneumoniae 1084]	50	23.762	2e-10
FHG68_RS17415	VFG014893(gb|NP_254009) (algC) phosphomannomutase AlgC [Alginate biosynthesis (CVF522)] [Pseudomonas aeruginosa PAO1]	97	26.419	5.77e-36
FHG68_RS17445	VFG000670(gb|NP_706258) (gtrB) bactoprenol glucosyl transferase [LPS (VF0124)] [Shigella flexneri 2a str. 301]	83	28.643	2.68e-14
FHG68_RS17505	VFG002440(gb|YP_111528) (bprB) two-component response regulator [Bsa T3SS (VF0428)] [Burkholderia pseudomallei K96243]	96	28.972	2.74e-31
FHG68_RS17515	VFG002276(gb|NP_561089) (colA) collagenase [kappa-toxin (VF0388)] [Clostridium perfringens str. 13]	67	28.618	8.16e-73
FHG68_RS17520	VFG011414(gb|NP_539767) (kdsA) 2-dehydro-3-deoxyphosphooctonate aldolase [LPS (CVF383)] [Brucella melitensis bv. 1 str. 16M]	49	27.66	4.48e-11
FHG68_RS17610	VFG013236(gb|NP_438231) (kdsB) 3-deoxy-manno-octulosonate cytidylyltransferase [LOS (CVF494)] [Haemophilus influenzae Rd KW20]	93	41.803	6.5e-50
FHG68_RS17615	VFG001925(gb|NP_282549) (fliL) flagellar basal body protein FliL [Flagella (VF0114)] [Campylobacter jejuni subsp. jejuni NCTC 11168]	53	29.787	4.91e-07
FHG68_RS17620	VFG038831(gb|YP_857806) (pomB2) flagellar motor protein MotB [Polar flagella (CVF786)] [Aeromonas hydrophila subsp. hydrophila ATCC 7966]	92	24.013	8.87e-18
FHG68_RS17625	VFG038835(gb|YP_857807) (pomA2) chemotaxis protein PomA [Polar flagella (CVF786)] [Aeromonas hydrophila subsp. hydrophila ATCC 7966]	97	37.795	6.42e-53
FHG68_RS17670	VFG039386(gb|NP_819821) (coxH2) Coxiella Dot/Icm type IVB secretion system translocated effector [Dot/Icm (SS051)] [Coxiella burnetii RSA 493]	70	31.034	1.08e-08
FHG68_RS17745	VFG016005(gb|NP_251085) (pvdO) pyoverdine biosynthesis protein PvdO [pyoverdine (IA001)] [Pseudomonas aeruginosa PAO1]	87	25.54	1.04e-11
FHG68_RS17775	VFG002060(gb|NP_248764) (ppkA) serine/threonine protein kinase PpkA [HSI-I (VF0334)] [Pseudomonas aeruginosa PAO1]	10	28.962	2.82e-12
FHG68_RS17810	VFG049152(gb|YP_006635478.1) (clbF) colibactin biosynthesis dehydrogenase ClbF [Colibactin (VF0573)] [Klebsiella pneumoniae subsp. pneumoniae 1084]	63	26.575	1.19e-25
FHG68_RS17820	VFG037100(gb|NP_273110) (msrA/B(pilB)) trifunctional thioredoxin/methionine sulfoxide reductase A/B protein [MsrAB (VF0456)] [Neisseria meningitidis MC58]	97	44.118	5.5e-45
FHG68_RS17845	VFG015950(gb|NP_251075) (pvdQ) 3-oxo-C12-homoserine lactone acylase PvdQ [pyoverdine (IA001)] [Pseudomonas aeruginosa PAO1]	65	21.513	2.94e-09
FHG68_RS17935	VFG000075(gb|NP_463962) (inlA) Internalin A [InlA (VF0069)] [Listeria monocytogenes EGD-e]	84	31.507	1.83e-08
FHG68_RS17960	VFG005785(gb|NP_687688) (cylF) putative aminomethyltransferase CylF [Beta-hemolysin/cytolysin (CVF171)] [Streptococcus agalactiae 2603V/R]	64	23.984	1.94e-09
FHG68_RS18075	VFG002351(gb|YP_001006764) (flgB) flagellar basal-body rod protein FlgB [Flagella (VF0394)] [Yersinia enterocolitica subsp. enterocolitica 8081]	69	28.155	2.32e-08
FHG68_RS18080	VFG006686(gb|NP_208349) (flgC) flagellar basal-body rod protein FlgC [Flagella (CVF223)] [Helicobacter pylori 26695]	95	39.375	5.67e-30
FHG68_RS18085	VFG038622(gb|YP_855903) (fliE) flagellar hook-basal body complex protein FliE [ND (AI144)] [Aeromonas hydrophila subsp. hydrophila ATCC 7966]	57	32.877	7.39e-09
FHG68_RS18190	VFG000079(gb|NP_463763) (clpC) endopeptidase Clp ATP-binding chain C [ClpC (VF0072)] [Listeria monocytogenes EGD-e]	96	51.784	0
FHG68_RS18200	VFG001206(gb|NP_273675) (fbpC) iron(III) ABC transporter, ATP-binding protein [FbpABC (VF0272)] [Neisseria meningitidis MC58]	84	31.795	3.89e-25
FHG68_RS18280	VFG038722(gb|YP_855928) (AHA_1389) CobQ/CobB/MinD/ParA family protein [Polar flagella (CVF786)] [Aeromonas hydrophila subsp. hydrophila ATCC 7966]	95	29.412	2.74e-29
FHG68_RS18370	VFG043373(gb|NP_207190) (cheA) histidine kinase CheA [Pse5Ac7Ac (AI150)] [Helicobacter pylori 26695]	90	30.508	3.82e-07
FHG68_RS18375	VFG038234(gb|YP_001845365) (bfmS) signal transduction histidine kinase [BfmRS (VF0463)] [Acinetobacter baumannii ACICU]	46	27.53	6.74e-14
FHG68_RS18405	VFG001965(gb|NP_282578) (Cj1437c) aminotransferase [Capsule (VF0323)] [Campylobacter jejuni subsp. jejuni NCTC 11168]	52	28.708	5.12e-08
FHG68_RS18420	VFG014720(gb|NP_250152) (motD) flagellar motor protein [Deoxyhexose linking sugar, 209 Da capping structure (AI138)] [Pseudomonas aeruginosa PAO1]	96	25.769	8.18e-16
FHG68_RS18605	VFG038176(gb|YP_001847748) (ompA) outer membrane protein OmpA [OmpA (VF0464)] [Acinetobacter baumannii ACICU]	23	44.231	2.52e-20
FHG68_RS18625	VFG049120(gb|YP_002918207.1) (allB) allantoinase [Allantion utilization (VF0572)] [Klebsiella pneumoniae subsp. pneumoniae NTUH-K2044]	95	24.711	3.69e-22
FHG68_RS18675	VFG013248(gb|NP_438233) (msbA) lipid transporter ATP-binding/permease [LOS (CVF494)] [Haemophilus influenzae Rd KW20]	82	35.26	1.16e-108
FHG68_RS18680	VFG015515(gb|NP_252903) (phzE1) phenazine biosynthesis protein PhzE [Phenazines biosynthesis (CVF536)] [Pseudomonas aeruginosa PAO1]	95	26.042	7.62e-08
FHG68_RS18685	VFG044323(gb|YP_002920243) (ybtS) yersiniabactin biosynthesis salicylate synthase YbtS [Ybt (VF0564)] [Klebsiella pneumoniae subsp. pneumoniae NTUH-K2044]	57	32.593	2.64e-39
FHG68_RS18690	VFG049152(gb|YP_006635478.1) (clbF) colibactin biosynthesis dehydrogenase ClbF [Colibactin (VF0573)] [Klebsiella pneumoniae subsp. pneumoniae 1084]	69	27.273	6.82e-29
FHG68_RS18740	VFG000841(gb|YP_325609) (hlyB) hemolysin transport protein [Hemolysin (VF0207)] [Escherichia coli O157:H7 str. EDL933]	30	29.148	6.6e-12
FHG68_RS18750	VFG000344(gb|NP_438273) (hitC) iron(III) ABC transporter, ATP-binding protein [HitABC (VF0268)] [Haemophilus influenzae Rd KW20]	68	28.111	5.29e-21
FHG68_RS18855	VFG049150(gb|YP_006635476.1) (clbD) colibactin biosynthesis dehydrogenase ClbD [Colibactin (VF0573)] [Klebsiella pneumoniae subsp. pneumoniae 1084]	65	27.891	8.08e-21
FHG68_RS18880	VFG000344(gb|NP_438273) (hitC) iron(III) ABC transporter, ATP-binding protein [HitABC (VF0268)] [Haemophilus influenzae Rd KW20]	78	31.66	6.83e-27
FHG68_RS18885	VFG001206(gb|NP_273675) (fbpC) iron(III) ABC transporter, ATP-binding protein [FbpABC (VF0272)] [Neisseria meningitidis MC58]	74	32.353	9.7e-29
FHG68_RS18925	VFG043209(gb|YP_001006778) (cheD) methyl-accepting chemotaxis protein CheD [peritrichous flagella (AI145)] [Yersinia enterocolitica subsp. enterocolitica 8081]	89	28.185	2.77e-18
FHG68_RS18935	VFG006717(gb|NP_465159) (lap) Listeria adhesion protein Lap [Lap (VF0444)] [Listeria monocytogenes EGD-e]	44	27.273	7.05e-07
FHG68_RS18945	VFG000983(gb|NP_231094) (rtxA) RTX toxin RtxA [MARTX (VF0265)] [Vibrio cholerae O1 biovar El Tor str. N16961]	43	34.677	3.63e-12
FHG68_RS18955	VFG002529(gb|YP_109900) (tsr) methyl-accepting chemotaxis protein I [Flagella (VF0430)] [Burkholderia pseudomallei K96243]	56	26.599	2.91e-21
FHG68_RS18960	VFG007177(gb|NP_798078) (exsA) transcriptional regulator ExsA [T3SS1 (VF0408)] [Vibrio parahaemolyticus RIMD 2210633]	36	27.723	2.93e-08
FHG68_RS19005	VFG002224(gb|NP_540321) (wbkA) mannosyltransferase [LPS (VF0367)] [Brucella melitensis bv. 1 str. 16M]	81	25.806	2.38e-19
FHG68_RS19020	VFG001817(gb|NP_216900) (mbtA) Bifunctional enzyme MbtA: salicyl-AMP ligase (SAL-AMP ligase) + salicyl-S-ArCP synthetase [Mycobactin (VF0299)] [Mycobacterium tuberculosis H37Rv]	81	25.411	4.53e-24
FHG68_RS19025	VFG013065(gb|YP_405017) (shuT) periplasmic binding protein ShuT [Shu (VF0256)] [Shigella dysenteriae Sd197]	73	22.358	5.13e-09
FHG68_RS19100	VFG001955(gb|NP_282568) (Cj1427c) sugar-nucleotide epimerase/dehydratease [Capsule (VF0323)] [Campylobacter jejuni subsp. jejuni NCTC 11168]	70	27.801	7.58e-13
FHG68_RS19155	VFG001245(gb|NP_249778) (flgL) flagellar hook-associated protein 3 FlgL [Flagella (VF0273)] [Pseudomonas aeruginosa PAO1]	99	21.795	2.47e-15
FHG68_RS19160	VFG002342(gb|YP_001006755) (flgK) flagellar hook-associated protein 1 FlgK [Flagella (VF0394)] [Yersinia enterocolitica subsp. enterocolitica 8081]	50	29.607	8.32e-31
FHG68_RS19250	VFG011394(gb|NP_539748) (lpxD) UDP-3-O-[3-hydroxymyristoyl] glucosamine N-acyltransferase [LPS (CVF383)] [Brucella melitensis bv. 1 str. 16M]	79	32.993	1.66e-42
FHG68_RS19260	VFG046167(gb|YP_002305089.1) (CbuK_0688) Coxiella Dot/Icm type IVB secretion system translocated effector [T4SS effectors (CVF803)] [Coxiella burnetii CbuK_Q154]	57	44.03	9.2e-20
FHG68_RS19305	VFG038831(gb|YP_857806) (pomB2) flagellar motor protein MotB [Polar flagella (CVF786)] [Aeromonas hydrophila subsp. hydrophila ATCC 7966]	24	33.645	1.89e-10
FHG68_RS19385	VFG038722(gb|YP_855928) (AHA_1389) CobQ/CobB/MinD/ParA family protein [Polar flagella (CVF786)] [Aeromonas hydrophila subsp. hydrophila ATCC 7966]	96	34.413	1.13e-47
FHG68_RS19455	VFG038722(gb|YP_855928) (AHA_1389) CobQ/CobB/MinD/ParA family protein [Polar flagella (CVF786)] [Aeromonas hydrophila subsp. hydrophila ATCC 7966]	67	30.058	3.46e-27
FHG68_RS19515	VFG016046(gb|NP_251103) (pvdH) diaminobutyrate-2-oxoglutarate aminotransferase PvdH [pyoverdine (IA001)] [Pseudomonas aeruginosa PAO1]	64	29.355	1.31e-20
FHG68_RS19520	VFG001213(gb|NP_253236) (pilS) two-component sensor PilS [Type IV pili (VF0082)] [Pseudomonas aeruginosa PAO1]	59	23.56	2.04e-08
FHG68_RS19525	VFG038219(gb|YP_001845364) (bfmR) biofilm-controlling response regulator [BfmRS (VF0463)] [Acinetobacter baumannii ACICU]	97	31.718	4.75e-30
FHG68_RS19535	VFG000919(gb|NP_756176) (chuW) Putative oxygen independent coproporphyrinogen III oxidase [Chu (VF0227)] [Escherichia coli CFT073]	53	25.203	2e-20
FHG68_RS19560	VFG038722(gb|YP_855928) (AHA_1389) CobQ/CobB/MinD/ParA family protein [Polar flagella (CVF786)] [Aeromonas hydrophila subsp. hydrophila ATCC 7966]	52	36.686	1.15e-21
FHG68_RS19590	VFG002550(gb|YP_109386) (wcbP) capsular polysaccharide biosynthesis dehydrogenase/reductase [Capsule I (VF0436)] [Burkholderia pseudomallei K96243]	87	32.127	1.54e-32
FHG68_RS19595	VFG048962(gb|YP_002920365.1) (wzb) protein tyrosine phosphatase [Capsule (VF0560)] [Klebsiella pneumoniae subsp. pneumoniae NTUH-K2044]	83	29.605	1.64e-14
FHG68_RS19625	VFG005767(gb|NP_687682) (cylG) 3-ketoacyl-ACP-reductase CylG [Beta-hemolysin/cytolysin (CVF171)] [Streptococcus agalactiae 2603V/R]	79	27.727	8.01e-16
FHG68_RS19820	VFG045467(gb|YP_107884) (cdpA) cyclic di-GMP phosphodiesterase [CdpA (VF0432)] [Burkholderia pseudomallei K96243]	30	28.902	4.56e-08
FHG68_RS19825	VFG045467(gb|YP_107884) (cdpA) cyclic di-GMP phosphodiesterase [CdpA (VF0432)] [Burkholderia pseudomallei K96243]	56	21.271	1.63e-14
FHG68_RS19855	VFG045467(gb|YP_107884) (cdpA) cyclic di-GMP phosphodiesterase [CdpA (VF0432)] [Burkholderia pseudomallei K96243]	43	31.197	8.74e-34
FHG68_RS19950	VFG001287(gb|NP_647405) (icaB) N-deacetylase, involved in polysaccharide intercellular adhesin(PIA) synthesis [Intercellular adhesion proteins (VF0014)] [Staphylococcus aureus subsp. aureus MW2]	39	26.697	3.31e-12
FHG68_RS20045	VFG005767(gb|NP_687682) (cylG) 3-ketoacyl-ACP-reductase CylG [Beta-hemolysin/cytolysin (CVF171)] [Streptococcus agalactiae 2603V/R]	93	30.328	1.58e-28
FHG68_RS20070	VFG038839(gb|YP_858598) (flmH) short chain dehydrogenase/reductase family oxidoreductase [Polar flagella (CVF786)] [Aeromonas hydrophila subsp. hydrophila ATCC 7966]	80	30.137	5.86e-19
FHG68_RS20075	VFG000871(gb|NP_757239) (fimB) Type 1 fimbriae Regulatory protein fimB [Type 1 fimbriae (VF0221)] [Escherichia coli CFT073]	54	27.168	1.85e-08
FHG68_RS20090	VFG002527(gb|YP_109898) (cheD) chemoreceptor glutamine deamidase CheD [Flagella (VF0430)] [Burkholderia pseudomallei K96243]	80	30.657	9.48e-17
FHG68_RS20210	VFG015994(gb|NP_251084) (pvdN) pyoverdine biosynthesis protein PvdN [pyoverdine (IA001)] [Pseudomonas aeruginosa PAO1]	78	22.812	2.71e-16
FHG68_RS20305	VFG000130(gb|NP_252238) (algI) alginate o-acetyltransferase AlgI [Alginate (VF0091)] [Pseudomonas aeruginosa PAO1]	83	37.562	6.91e-77
FHG68_RS20315	VFG000130(gb|NP_252238) (algI) alginate o-acetyltransferase AlgI [Alginate (VF0091)] [Pseudomonas aeruginosa PAO1]	81	39.175	3.47e-91
FHG68_RS20330	VFG002224(gb|NP_540321) (wbkA) mannosyltransferase [LPS (VF0367)] [Brucella melitensis bv. 1 str. 16M]	94	30.027	8.38e-37
FHG68_RS20370	VFG000075(gb|NP_463962) (inlA) Internalin A [InlA (VF0069)] [Listeria monocytogenes EGD-e]	65	28.025	1.81e-15
FHG68_RS20385	VFG044334(gb|YP_002920266) (iroN) salmochelin receptor IroN [Sal (VF0563)] [Klebsiella pneumoniae subsp. pneumoniae NTUH-K2044]	71	21.897	7.99e-13
FHG68_RS20415	VFG014950(gb|NP_249457) (mucD) serine protease MucD precursor [Alginate regulation (CVF523)] [Pseudomonas aeruginosa PAO1]	57	30.612	1.18e-23
FHG68_RS20440	VFG001300(gb|NP_644942) (cap8D) capsular polysaccharide synthesis enzyme Cap8D [Capsule (VF0003)] [Staphylococcus aureus subsp. aureus MW2]	87	42.805	1.7e-137
FHG68_RS20525	VFG041278(gb|YP_095455) (vpdC) Dot/Icm type IV secretion system effector VpdC [Dot/Icm (SS047)] [Legionella pneumophila subsp. pneumophila str. Philadelphia 1]	59	24.88	2.14e-10
FHG68_RS20570	VFG005767(gb|NP_687682) (cylG) 3-ketoacyl-ACP-reductase CylG [Beta-hemolysin/cytolysin (CVF171)] [Streptococcus agalactiae 2603V/R]	86	24.186	1.42e-10
FHG68_RS20670	VFG009810(gb|NP_215272) (phoR) Possible two component system response sensor kinase membrane associated PhoR [PhoP/R (CVF331)] [Mycobacterium tuberculosis H37Rv]	30	28.017	3.82e-20
FHG68_RS20690	VFG038176(gb|YP_001847748) (ompA) outer membrane protein OmpA [OmpA (VF0464)] [Acinetobacter baumannii ACICU]	26	32.673	3.98e-08
FHG68_RS20710	VFG038219(gb|YP_001845364) (bfmR) biofilm-controlling response regulator [BfmRS (VF0463)] [Acinetobacter baumannii ACICU]	96	36.797	6.71e-47
FHG68_RS20780	VFG000130(gb|NP_252238) (algI) alginate o-acetyltransferase AlgI [Alginate (VF0091)] [Pseudomonas aeruginosa PAO1]	77	42.246	1.69e-84
FHG68_RS20805	VFG038397(gb|YP_856376) (vasH/clpV) sigma-54 dependent transcriptional regulator [T6SS (SS194)] [Aeromonas hydrophila subsp. hydrophila ATCC 7966]	59	22.581	1.85e-07
FHG68_RS20810	VFG038722(gb|YP_855928) (AHA_1389) CobQ/CobB/MinD/ParA family protein [Polar flagella (CVF786)] [Aeromonas hydrophila subsp. hydrophila ATCC 7966]	57	26.163	1.7e-10
FHG68_RS21050	VFG017856(gb|YP_001007658) (pilW) type IV fimbrial biogenesis protein PilW [Type IV pili (CVF049)] [Yersinia enterocolitica subsp. enterocolitica 8081]	99	27.5	4.11e-28
FHG68_RS21295	VFG017856(gb|YP_001007658) (pilW) type IV fimbrial biogenesis protein PilW [Type IV pili (CVF049)] [Yersinia enterocolitica subsp. enterocolitica 8081]	98	24.601	1.85e-21

## Sheet: Table S7
Supplementary data 1, Table S7. Presence and absence of confirmed virulence genes in Leptospira weilii strains CUDO6 and cUD13 compared with other Leptospira species
Protein	Function	Locus tag	Role	L. weilii																			L. interrogans 56601	L. kirschneri 3522 CT	L. noguchii CZ 214	L. alexanderi L60	L. borgpetersenii L550	L. mayottensis 200901116	L. santarosai LT 821	L. alstonii 80-412	L. kmetyi Bejo-Iso9	L. lincerasiae VAR 010	L. wolffii Khorat-H2	L. broomii 5399	L. inadai M34/99	L. fainei BUT6	L. venezuelensis CLM-U50	L. biflexa Patoc I	L. yanagawae Sao Paulo	L. meyeri Went5	L. vanthielii Waz Holland	L. wolbachii CDC	L. terpstrae LT 11-33	L. idonii 201300427
				CUDO6	CUD13	LT 2116	2006001853	2006001855	Ecochallenge	LNT 1234	UI 13098	56622	56646	56679	56674	56145	56105	56621	56655	L 231	LNT 1194	UT 14631
LenA	Endostatin-like protein	LIC_12096	Adhsion to ECM	62.128	62.128	65.106	62.128	61.702	62.128	62.128	62.553	62.979	62.979	62.553	62.168	0	62.288	62.128	62.128	62.553	62.553	62.533	97.917	95.671	69.198	62.128	62.288	62.288	57.021	66.957	33.33	0	30.769	36.719	0	0	31.548	31.694	32.961	35.976	35.897	36.264	34.359	0
LenB	Endostatin-like protein	LIC_10997	Adhsion to ECM	0	0	0	0	0	0	0	0	0	0	0	0	0	0	0	0	0	0	0	100	0	0	0	0	0	0	0	0	0	0	0	0	0	0	0	0	0	0	0	0	0
LenC	Endostatin-like protein	LIC_13006	Adhsion to ECM	65.074	65.441	0	65.074	65.074	62.316	65.074	65.441	64.706	64.706	65.441	64.552	62.526	0	65.441	65.074	63.768	63.768	64.855	99.351	75.488	71.024	64.338	0	40.976	0	79.176	26.875	30.573	32.075	28.488	31.707	30.488	0	0	36.306	35.359	32.127	32.512	40.113	0
LenD	Endostatin-like protein	LIC_12315	Adhsion to ECM	0	0	0	0	0	0	0	0	0	0	0	0	0	0	0	0	0	0	0	99.542	85.034	30.612	0	0	0	0	33.816	32.804	34.132	31.731	0	0	0	31.694	35.602	0	35.503	32.195	31.795	35.135	50
LenE	Endostatin-like protein	LIC_13467	Adhsion to ECM	50	50	42.708	0	0	0	43.75	43.75	43.229	43.229	43.523	43.229	43.229	0	43.75	0	43.523	43.75	43.229	100	88.608	86.076	0	45.833	0	39.024	0	32.653	37.857	0	0	38.889	36.508	0	42.969	36.735	0	35.088	40.945	44.444	32.022
LigA	Immonoglobulin like-repeat protein	LIC_10465	Adhsion to ECM	0	0	0	0	0	0	0	0	0	0	0	0	0	0	0	0	0	0	0	100	90.686	0	0	0	0	0	0	0	0	0	0	0	0	0	0	0	0	0	0	0	0
LigB	Immonoglobulin like-repeat protein	LIC_10464	Adhsion to ECM	65.553	65.553	65.788	65.449	65.605	65.658	65.449	65.449	65.658	65.658	65.658	65.605	65.605	65.777	65.553	65.449	65.446	65.449	65.658	96.614	91.228	76.839	66.075	64.353	65.044	66.215	48.137	64.808	49.279	48.326	47.983	48.139	48.049	49.433	0	0	0	0	0	0	0
OmpL1	Transmembrane protein	LIC_10973	Adhsion to ECM	86.562	87.329	85.625	86.562	86.562	86.562	86.562	86.562	86.562	86.562	86.562	86.562	86.562	85.938	86.562	86.562	86.562	86.562	86.556	93.75	98.75	95.625	86.25	87.188	87.5	86.875	89.062	85	49.689	51.084	51.863	51.863	52.484	47.077	45.333	45.098	45	40.85	43.137	45.333	43.564
OmpL37	Transmembrane protein	LIC_12263	Adhsion to ECM	83.582	83.582	83.284	83.284	83.234	83.234	83.582	82.985	83.284	83.284	82.985	83.284	83.284	82.985	83.284	83.582	82.985	82.985	82.985	100	96.979	95.166	85.672	87.688	87.387	86.647	85.498	83.832	63.393	60.542	60.961	58.806	61.446	63.393	0	46.933	46.933	48.466	48.466	47.546	48.589
OmpL47	Transmembrane protein	LIC_13050	Adhsion to ECM	84.384	84.384	83.562	84.384	88.116	84.153	84.384	88.116	84.384	88.116	84.384	88.116	88.116	83.836	84.384	84.384	84.384	84.384	88.116	100	94.262	96.185	84.384	83.967	85.47	85.519	86.301	89.318	50	54.785	45.93	45.378	44.477	50.158	52.075	51.698	51.321	49.438	50.187	50.943	44.543
LipL21	Lipoprotein	LIC_10011	Neutrophil myeloperoxidase inhibitor	96.774	96.774	97.312	96.774	96.774	97.312	96.774	96.774	96.774	96.774	96.774	96.774	96.744	97.312	96.774	96.774	96.774	96.774	96.774	100	98.925	98.387	96.774	96.774	97.312	95.109	93.548	96.237	81.622	84.324	84.865	85.946	85.946	82.162	47.396	47.619	47.619	47.619	47.619	47.619	47.368
LipL45	Outer membrane protein	LA_2295	Adhsion to ECM	88.946	88.946	89.717	88.946	88.946	88.946	88.946	88.946	88.946	88.946	88.946	88.946	88.946	89.717	88.946	88.946	88.946	88.946	88.946	100	98.196	97.943	89.744	88.968	89.974	90.746	90.231	91.774	63.939	62.051	67.775	68.031	68.031	63.939	55.051	55.668	55.051	55.051	55.164	55.051	52.417
LruA	Lipoprotein	LIC_11003	Unknown/associated with acute disease	86.717	86.717	85.769	86.907	86.907	86.89	86.717	86.907	86.907	86.907	86.907	86.907	86.528	86.338	86.907	88.717	86.907	86.907	86.717	99.82	97.477	96.396	86.692	85.958	86.907	82.292	87.977	85.851	59.391	61.174	63.727	60.269	62.795	61.217	38.675	37.866	38.78	37.712	37.764	37.58	40
LipL32	Outer membrane protein	LA_2637	Adhsion to ECM	94.118	94.118	93.75	94.118	94.118	94.485	94.118	94.485	94.485	94.495	94.485	94.485	94.485	93.75	94.118	94.118	94.485	94.485	94.485	100	100	100	94.118	98.162	94.118	98.897	98.162	93.75	67.279	68.382	71.119	71.119	71.429	67.279	0	0	0	0	0	0	0
FcpA	Flagella coling protein	LIC_13166	Dissemination	94.719	94.719	97.69	94.719	94.719	94.719	94.719	94.719	94.719	94.719	94.719	94.719	94.719	97.69	94.719	94.719	94.719	94.719	94.719	100	100	97.69	97.03	98.02	98.02	97.69	98.02	98.02	86.799	86.799	87.948	87.948	87.948	86.799	76.744	77.076	77.076	75.748	75.748	75.748	75.67
FlaA2	Flagella assembly	LIC_10787	Dissemination	98.326	98.745	98.745	98.745	98.745	98.745	98.745	98.745	98.745	98.745	98.745	98.745	98.745	98.745	98.745	98.745	98.745	98.745	98.745	100	100	97.49	99.163	98.745	98.745	99.163	97.071	97.908	82.158	81.172	81.59	82.008	83.333	83.333	70.213	69.787	70.213	70.213	70.213	70.638	70.513
FliM	Flagella motor switch protein	LIC_11836	Dissemination	99.12	99.12	98.955	99.12	99.12	99.013	98.827	99.12	99.12	99.12	99.12	99.12	99.12	99.12	99.12	98.827	99.12	99.12	99.12	100	100	100	99.12	99.12	99.413	98.827	99.12	99.12	92.669	92.962	92.669	92.669	92.669	92.962	88.27	88.563	88.856	87.977	88.856	88.856	87.861
FliN	Flagella motor switch protein	LIC_11370	Dissemination	91.525	91.525	91.525	91.525	91.525	92.09	91.525	91.808	91.525	91.525	91.808	91.808	91.525	90.196	91.243	91.525	91.808	92.09	91.525	100	99.718	98.588	92.09	92.09	91.525	93.503	95.198	95.198	73.654	73.58	75.284	74.148	73.864	74.221	55.618	56.742	56.742	55.618	56.187	55.899	53.221
LIC20111	Hypothetical protein	LIC_20111	Gene regulation	94.545	94.545	94.747	94.534	94.343	34.177	94.545	94.545	94.141	94.141	94.343	94.545	94.534	94.343	33.61	94.545	94.343	94.545	94.534	99.798	98.586	96.566	95.354	94.343	95.949	94.545	94.141	90.707	32.512	25.097	24.291	30.631	25.887	25	38.6	37.425	37.349	36.345	36.419	36.364	37.525
Loa22	OmpA family protein	LIC_10191	Unknown/associated with acute disease	94.872	94.872	94.872	93.846	93.846	94.872	94.872	94.359	94.872	94.872	94.359	94.872	94.359	93.846	93.846	93.846	94.359	93.846	94.872	99.487	97.949	98.462	94.359	94.872	93.846	94.388	95.897	94.872	71.277	71.282	69.948	69.948	69.849	71.277	56.452	55.914	54.301	53.226	53.763	54.301	54.011
ColA	Collagenase A	LIC_12760	Dissemination	75.928	75.928	77.053	75.928	76.689	76.689	75.928	76.914	76.802	76.351	76.802	77.027	77.027	77.621	77.252	75.928	76.914	77.14	76.914	99.887	88.414	78.388	78.065	86.18	84.027	60.645	59.748	0	0	0	0	0	0	0	0	0	0	0	0	0	0
Mce	Mammary cell entry protein	LIC_11859	Cell entry	90.361	90.361	90.763	90.361	89.96	89.96	90.361	89.96	89.96	89.96	89.558	89.96	90.361	90.763	89.96	89.96	89.96	89.96	89.96	100	97.992	97.189	89.558	89.96	89.558	89.558	93.173	90.361	74	71.888	72.289	70.683	71.486	72.8	60.714	61.905	59.524	60.317	60.714	61.508	59.922
HtpG	Hight temperature protein G	LIC_20044	Unknown/associated with acute disease	92.751	92.751	92.751	92.751	92.751	0	92.295	92.751	92.751	92.586	92.751	92.751	92.751	92.916	92.751	92.751	92.586	92.586	92.586	99.671	98.023	95.552	93.245	91.914	93.41	92.257	92.939	91.626	74.135	73.147	0	73.355	73.191	73.806	65.45	65.404	65.239	65.404	65.074	66.393	67.657
KatE	Catalase	LIC_12032	Resist oxidative stress	88.15	88.15	87.942	88.15	88.358	88.15	88.15	88.15	88.15	88.15	88.15	88.15	88.15	87.942	88.15	85.329	87.942	88.15	88.15	100	98.545	97.297	88.358	88.358	87.734	88.47	88.075	87.056	0	82.536	0	0	0	0	0	0	0	0	0	0	0
ClpB	Molecular chaperone	LIC_12017	Resist heat and oxidative stress	91.269	91.269	91.385	91.502	43.418	43.418	91.385	91.502	91.502	91.502	91.502	91.502	91.618	91.269	91.502	91.618	91.502	91.502	91.502	99.884	97.322	96.857	92.433	91.967	91.385	92.084	92.666	91.608	76.69	76.923	77.921	77.57	78.037	77.156	42.193	42.67	42.363	41.836	41.597	42.074	43.218
Sph2	Sphingomyelase 2	LIC_12631	Hemolytic activity	57.764	58.216	49.917	56.777	59.615	49.406	58.675	59.455	61.644	61.644	59.615	58.333	65.81	57.372	68.79	66.132	59.776	57.051	59.295	99.012	84.551	81.301	59.468	56.571	59.756	60.544	60.611	65.474	0	0	0	0	0	0	0	0	0	0	0	0	0
HemO	Heme oxygenase	LIC_20148	Iron acquisition	88	88	88.889	88	88	88	88	88	88	88	88	88	88	89.333	88	88	88	88	88	99.556	96.444	96.889	89.333	87.556	89.778	0	89.333	85.333	56	56.444	0	0	0	56	45.175	45.614	44.298	46.46	46.46	45.614	44.248
La1641	LPS biosynthesis	LIC_12142	Unknown/associated with acute disease	38.571	38.571	47.619	32	28.431	0	49.072	49.072	48.806	48.806	49.072	49.337	32	47.215	49.072	32	49.072	49.072	49.072	99.738	47.745	48.677	48.011	25	30.693	24.017	45.358	47.12	26.486	22.788	26.549	60.526	26.151	26.214	26.818	25.63	26.484	46.316	40.576	25.67	27.857
LpxD1	Lipid A biosynthesis protein	LIC_13046	Tempature adaptation	83.728	83.728	84.911	83.728	83.728	83.728	83.728	83.728	83.728	83.728	83.728	83.728	83.728	84.615	83.728	83.728	83.728	83.728	83.728	100	95.588	95.882	82.84	81.065	84.273	83.976	83.136	80.769	36.863	34.496	33.591	34.749	34.363	35.294	60.896	61.538	63.205	61.424	62.908	62.908	63.314
LipL41 (HbpA)	TonB-dependent receptor	LA_0616	Iron acquisition	95.493	95.493	95.211	95.493	20.991	0	94.93	95.493	95.439	95.493	95.493	95.493	95.493	95.211	95.493	95.493	95.493	95.493	95.493	100	99.155	99.155	95.493	96.901	96.056	96.338	95.211	90.113	72.727	72.159	72.113	72.676	72.394	72.443	0	0	0	0	0	0	0
LA0589	Hypothetical protein	LA_0589	Unknown/associated with host colonization	69.793	69.793	67.981	70.142	61.36	61.36	68.927	66.238	66.316	64.103	66.316	66.319	64.336	65.839	69.243	61.515	61.932	66.537	66.537	100	84.335	73.312	70.142	70.275	68.182	57.887	65.831	0	0	0	0	0	0	0	0	0	0	0	0	0	0
LA2786	Hypothetical protein	LA_2786	Unknown/associated with host colonization	45.856	45.856	0	46.409	46.409	45.304	46.409	46.409	46.409	46.409	46.409	35.955	45.856	0	45.856	46.409	45.856	46.409	46.409	100	94.924	37.179	0	35.484	45.098	40.838	79.429	53.548	0	0	0	0	0	0	0	0	0	0	0	0	0
LB194	Hypothetical protein	LB_194	Unknown/associated with host colonization	76.142	76.142	77.32	76.142	76.142	76.65	76.142	76.65	76.65	76.65	76.65	76.65	76.142	77.32	76.65	76.142	76.65	76.65	76.65	100	93.75	92.708	75.758	76.884	78.125	80.729	80.729	78.646	31.646	39.583	0	0	0	60	28.704	29.808	0	0	0	0	0
TlyA	Hemolysin A	LIC_10284	Hemolytic activity	84.942	84.942	82.625	84.942	83.784	84.646	84.942	84.556	84.556	84.556	84.556	84.942	84.942	84.942	84.942	84.942	84.556	84.942	84.556	99.228	93.822	94.981	84.556	82.625	83.612	83.398	83.012	77.606	53.64	54.406	53.64	52.4	52.107	54.023	47.49	48.263	49.035	46.332	46.332	47.104	49.807

## Sheet: Table S8
Supplementary data 1, Table S8. Orthologous genes of serovar determinant region sharing in Leptospira weilii serogroup Mini strains CUDO6 and Leptospira mayottensis strain 200901116
Locustag_CUDO6	Gene annotation	Ortholog with strain 200901116	Identity	E-value
FHG67_RS14060	MarR family EPS-associated transcriptional regulator	LEP1GSC190_RS06935	96.226	6.48e-75
FHG67_RS14055	GDP-L-fucose synthase	LEP1GSC190_RS06940	96.463	0
FHG67_RS14050	iron-containing alcohol dehydrogenase	LEP1GSC190_RS06945	96.676	0
FHG67_RS14045	glycosyltransferase	LEP1GSC190_RS06950	96.818	4.78e-162
FHG67_RS14040	acetylneuraminic acid synthetase	LEP1GSC190_RS06955	96.61	0
FHG67_RS14035	cytidylyltransferase	LEP1GSC190_RS06960	96.087	3.41e-167
FHG67_RS14030	class I SAM-dependent methyltransferase	LEP1GSC190_RS06965	92.647	5.13e-143
FHG67_RS14025	carbamoyltransferase	LEP1GSC190_RS06970	97.663	0
FHG67_RS14020	DegT/DnrJ/EryC1/StrS family aminotransferase	LEP1GSC190_RS06975	97.416	0
FHG67_RS14015	carbamoyltransferase	LEP1GSC190_RS06980	97.942	0
FHG67_RS14010	cytidylyltransferase	LEP1GSC190_RS06985	93.007	0
FHG67_RS14005	DegT/DnrJ/EryC1/StrS family aminotransferase	LEP1GSC190_RS06990	94.005	0
FHG67_RS14000	hypothetical protein	LEP1GSC190_RS06995	88.696	0
FHG67_RS13995	GNAT family N-acetyltransferase	LEP1GSC190_RS07000	96.154	1.85e-134
FHG67_RS13990	carbamoyltransferase	LEP1GSC190_RS07005	95.238	0
FHG67_RS13980	hypothetical protein	LEP1GSC190_RS07010	95.446	0
FHG67_RS13975	class I SAM-dependent methyltransferase	LEP1GSC190_RS07015	94.059	1.29e-146
FHG67_RS13970	transferase hexapeptide repeat protein	LEP1GSC190_RS07020	94.805	9.92e-165
FHG67_RS13960	hypothetical protein	LEP1GSC190_RS07025	92.632	0
FHG67_RS13955	cytidylyltransferase	LEP1GSC190_RS07035	83.621	4.85e-149
FHG67_RS13950	surface carbohydrate biosynthesis protein	LEP1GSC190_RS07040	93.363	0
FHG67_RS13945	SDR family oxidoreductase	LEP1GSC190_RS07045	96.078	0
FHG67_RS13940	aldo/keto reductase	LEP1GSC190_RS07050	88.854	0
FHG67_RS13935	NeuB family protein	LEP1GSC190_RS07055	94.681	0
FHG67_RS13930	glycosyl transferase family 28	LEP1GSC190_RS07060	89.097	0
FHG67_RS13925	WbqC family protein	LEP1GSC190_RS07065	91.189	3.45e-158
FHG67_RS13920	DegT/DnrJ/EryC1/StrS family aminotransferase	LEP1GSC190_RS07070	96.259	0
FHG67_RS13915	ATP-binding cassette domain-containing protein	LEP1GSC190_RS07075	92.077	0
FHG67_RS13910	putative sugar O-methyltransferase	LEP1GSC190_RS07080	92.837	0
FHG67_RS13905	transferase	LEP1GSC190_RS07085	85.304	0
FHG67_RS13900	6-phosphogluconolactonase	LEP1GSC190_RS07090	86.758	7.55e-143
FHG67_RS13895	FkbM family methyltransferase	LEP1GSC190_RS07095	93.015	0
FHG67_RS13890	SIS domain-containing protein	LEP1GSC190_RS07100	92.891	3.83e-147
FHG67_RS13885	2,4-dihydroxyhept-2-ene-1,7-dioic acid aldolase	LEP1GSC190_RS07105	87.649	4.9e-168
FHG67_RS13880	3-deoxy-manno-octulosonate cytidylyltransferase	LEP1GSC190_RS07110	96.414	0
FHG67_RS13875	Gfo/Idh/MocA family oxidoreductase	LEP1GSC190_RS07115	96.199	0
FHG67_RS13870	inositol phosphatase	LEP1GSC190_RS07120	87.402	6.36e-171
FHG67_RS13850	hypothetical protein	LEP1GSC190_RS07150	90.455	2.18e-142
FHG67_RS13845	hypothetical protein	LEP1GSC190_RS07155	89.73	0
FHG67_RS13840	FkbM family methyltransferase	LEP1GSC190_RS07175	97.484	0
FHG67_RS13835	Ubiquinone biosynthesis O-methyltransferase	LEP1GSC190_RS07180	93.301	7.66e-146
FHG67_RS13830	phosphoglycerate dehydrogenase	LEP1GSC190_RS07185	96.687	0
FHG67_RS13825	hypothetical protein	LEP1GSC190_RS07190	72.698	0
FHG67_RS13820	glycosyltransferase family 2 protein	LEP1GSC190_RS07195	90.667	0
FHG67_RS13815	N-acetyl sugar amidotransferase	LEP1GSC190_RS07200	94.211	0
FHG67_RS13810	imidazole glycerol phosphate synthase subunit HisH	LEP1GSC190_RS07205	93.137	3.02e-137
FHG67_RS13805	imidazole glycerol phosphate synthase subunit HisF	LEP1GSC190_RS07210	95.652	0
FHG67_RS13800	glycosyltransferase family 4 protein	LEP1GSC190_RS07215	91.389	0
FHG67_RS13795	SDR family NAD(P)-dependent oxidoreductase	LEP1GSC190_RS07220	93.072	0
FHG67_RS13790	nucleoside-diphosphate-sugar pyrophosphorylase	LEP1GSC190_RS07225	87.342	1.72e-162
FHG67_RS13785	NAD(P)-dependent oxidoreductase	LEP1GSC190_RS07230	96.085	0
FHG67_RS13775	NAD-dependent epimerase/dehydratase family protein	LEP1GSC190_RS07240	66.867	1.16e-170
FHG67_RS13765	UDP-N-acetylglucosamine 2-epimerase (non-hydrolyzing)	LEP1GSC190_RS07245	59.73	1.11e-168
FHG67_RS13760	glycosyltransferase family 4 protein	LEP1GSC190_RS07250	85.101	0
FHG67_RS13755	sugar transferase	LEP1GSC190_RS07255	95.962	0
FHG67_RS13750	oligosaccharide repeat unit polymerase	LEP1GSC190_RS07260	93.764	0
FHG67_RS13695	flippase	LEP1GSC190_RS07280	95.078	0
FHG67_RS13690	glycosyltransferase family 2 protein	LEP1GSC190_RS07285	87.708	0
FHG67_RS13685	methyltransferase	LEP1GSC190_RS07295	88.475	0
FHG67_RS13680	glycosyl transferase	LEP1GSC190_RS07300	88.024	0
FHG67_RS13675	WxcM-like domain-containing protein	LEP1GSC190_RS07305	89.362	5.78e-95
FHG67_RS13670	DegT/DnrJ/EryC1/StrS family aminotransferase	LEP1GSC190_RS07310	90.358	0
FHG67_RS13665	glycosyltransferase	LEP1GSC190_RS07315	89.057	4.66e-176
FHG67_RS13660	glycosyltransferase	LEP1GSC190_RS07320	81.139	4.56e-177
FHG67_RS13650	glycosyltransferase	LEP1GSC190_RS07330	83.992	0
FHG67_RS13645	dTDP-4-dehydrorhamnose 3,5-epimerase	LEP1GSC190_RS07335	93.011	8.03e-114
FHG67_RS13640	dTDP-4-dehydrorhamnose reductase	LEP1GSC190_RS07340	90.85	0
FHG67_RS13635	dTDP-glucose 4,6-dehydratase	LEP1GSC190_RS07345	95.415	0
FHG67_RS13630	glucose-1-phosphate thymidylyltransferase RfbA	LEP1GSC190_RS07350	91.497	0
FHG67_RS13625	glycosyltransferase family 2 protein	LEP1GSC190_RS07355	85.494	0
FHG67_RS13620	glycosyltransferase family 2 protein	LEP1GSC190_RS07360	92.053	0
FHG67_RS13600	glycosyltransferase family 2 protein	LEP1GSC190_RS07375	81.277	1.05e-149
FHG67_RS13595	DASS family sodium-coupled anion symporter	LEP1GSC190_RS07380	95.36	0

## Sheet: Table S9
Supplementary data 1, Table S9. Pan-genome analysis of plasmids pDO6, pD13, pLaicp, and p74
Unique id	Gene cluster id	Pan-genome*	Number of genomes	COG function accession	COG function	COG category
1	GC_00000001	Core	3	COG2207	AraC-type DNA-binding domain and AraC-containing proteins	K
18	GC_00000002	Core_2	2	COG3293	Transposase	X
19	GC_00000003	Core	3	COG3209|COG3209	Uncharacterized conserved protein RhaS, contains 28 RHS repeats|Uncharacterized conserved protein RhaS, contains 28 RHS repeats	R
33	GC_00000004	Core	3	COG5464	Predicted transposase YdaD	L
34	GC_00000005	Core_2	2	COG3415	Transposase	X
45	GC_00000006	Core_2	2	COG3293	Transposase	X
46	GC_00000007	Core_2	2	COG3335	Transposase	X
56	GC_00000008	Core	3
57	GC_00000009	Core_2	2	COG4804	Predicted nuclease of restriction endonuclease-like (RecB) superfamily, DUF1016 family	R
66	GC_00000010	Core	3
67	GC_00000011	Core_2	2
74	GC_00000012	Core_2	2	COG3293	Transposase	X
75	GC_00000013	Core_2	2	COG1372|COG3209	Intein/homing endonuclease|Uncharacterized conserved protein RhaS, contains 28 RHS repeats	L|X|R
82	GC_00000014	Core_2	2	COG3293	Transposase	X
83	GC_00000015	Core	3	COG2337	mRNA-degrading endonuclease, toxin component of the MazEF toxin-antitoxin module	V
88	GC_00000016	Core	3	COG2801	Transposase InsO and inactivated derivatives	X
89	GC_00000017	Core	3	COG2402	Predicted nucleic acid-binding protein, contains PIN domain	R
94	GC_00000018	Core	3	COG2336	Antitoxin component of the MazEF toxin-antitoxin module	T
95	GC_00000019	Core	3
99	GC_00000020	Core	3	COG2963	Transposase and inactivated derivatives	X
103	GC_00000021	Core	3
104	GC_00000022	Core	3	COG3935	DNA replication protein DnaD	L
109	GC_00000023	Core	3	COG3905	Predicted transcriptional regulator	K
110	GC_00000024	Core	3
115	GC_00000025	Core_2	2
116	GC_00000026	Core_2	2	COG4679	Phage-related protein	X
119	GC_00000027	Core_2	2
120	GC_00000028	Core_2	2
123	GC_00000029	Core_2	2
124	GC_00000030	Core_2	2
127	GC_00000031	Core_2	2	COG1396	Transcriptional regulator, contains XRE-family HTH domain	K
128	GC_00000032	Core_2	2	COG4680	mRNA-degrading endonuclease (mRNA interferase) HigB, toxic component of the HigAB toxin-antitoxin module	J
131	GC_00000033	Core_2	2
132	GC_00000034	Core_2	2
135	GC_00000035	Core_2	2	COG5499	Antitoxin component HigA of the HigAB toxin-antitoxin module, contains an N-terminal HTH domain	V
136	GC_00000036	Core_2	2
139	GC_00000037	Core_2	2	COG4991	Uncharacterized conserved protein YraI	S
140	GC_00000038	Core_2	2	COG2442	Uncharacterized conserved protein, DUF433 family	S
143	GC_00000039	Core_2	2	COG1569	Predicted nucleic acid-binding protein, contains PIN domain	R
144	GC_00000040	Core_2	2
147	GC_00000041	Core_2	2
148	GC_00000042	Core_2	2	COG1396	Transcriptional regulator, contains XRE-family HTH domain	K
151	GC_00000043	Core_2	2
152	GC_00000044	Core_2	2
155	GC_00000045	Core_2	2
156	GC_00000046	Core_2	2
159	GC_00000047	Core_2	2	COG4634	Predicted nuclease, contains PIN domain, potential toxin-antitoxin system component	R
160	GC_00000048	Core_2	2	COG1475	Chromosome segregation protein Spo0J, contains ParB-like nuclease domain	D
163	GC_00000049	Core_2	2	COG5620	Uncharacterized protein	S
164	GC_00000050	Core_2	2
167	GC_00000051	Core_2	2
168	GC_00000052	Core_2	2
171	GC_00000053	Core_2	2
172	GC_00000054	Core_2	2
175	GC_00000055	Core_2	2
176	GC_00000056	Core_2	2	COG2963	Transposase and inactivated derivatives	X
179	GC_00000057	Core_2	2	COG4634	Predicted nuclease, contains PIN domain, potential toxin-antitoxin system component	R
180	GC_00000058	Core_2	2	COG1192	Cellulose biosynthesis protein BcsQ	N
183	GC_00000059	Core_2	2	COG3420	Nitrous oxidase accessory protein NosD, contains tandem CASH domains	P
184	GC_00000060	Core_2	2
187	GC_00000061	Core_2	2
188	GC_00000062	Core_2	2
191	GC_00000063	Core_2	2	COG2801	Transposase InsO and inactivated derivatives	X
192	GC_00000064	Core_2	2
195	GC_00000065	Core_2	2
196	GC_00000066	Core_2	2
199	GC_00000067	Core_2	2	COG1476	DNA-binding transcriptional regulator, XRE-family HTH domain	K
200	GC_00000068	Core_2	2	COG3654	Prophage maintenance system killer protein	X
203	GC_00000069	Core_2	2	COG0864	Metal-responsive transcriptional regulator, contains CopG/Arc/MetJ DNA-binding domain	K
204	GC_00000070	Core_2	2
207	GC_00000071	Core_2	2	COG3093	Plasmid maintenance system antidote protein VapI, contains XRE-type HTH domain	V
208	GC_00000072	Core_2	2
211	GC_00000073	Core_2	2
212	GC_00000074	Core_2	2
215	GC_00000075	Core_2	2
216	GC_00000076	Core_2	2
219	GC_00000077	Core_2	2
220	GC_00000078	Core_2	2	COG2336	Antitoxin component of the MazEF toxin-antitoxin module	T
223	GC_00000079	Core_2	2	COG4748	Uncharacterized protein	S
224	GC_00000080	Core_2	2	COG0457	Tetratricopeptide (TPR) repeat	R
226	GC_00000081	p74	1	COG1192	Cellulose biosynthesis protein BcsQ	N
227	GC_00000081	pLaicp	1	COG1192	Cellulose biosynthesis protein BcsQ	N
228	GC_00000082	pLaicp	1
229	GC_00000083	p74	1
230	GC_00000084	pLaicp	1
231	GC_00000085	p74	1
232	GC_00000086	p74	1	COG4422	Bacteriophage protein gp37	X
233	GC_00000087	pLaicp	1
234	GC_00000088	p74	1	COG3123	Uncharacterized conserved protein YaiE, UPF0345 family	S
235	GC_00000089	p74	1	COG3706	Two-component response regulator, PleD family, consists of two REC domains and a diguanylate cyclase (GGDEF) domain	T|K
236	GC_00000090	pLaicp	1
237	GC_00000091	pD13	1
238	GC_00000092	p74	1	COG0262	Dihydrofolate reductase	H
239	GC_00000093	p74	1	COG4559	ABC-type hemin transport system, ATPase component	P
240	GC_00000094	p74	1	COG1309	DNA-binding transcriptional regulator, AcrR family	K
241	GC_00000095	p74	1	COG1848	Predicted nucleic acid-binding protein, contains PIN domain	R
242	GC_00000096	pLaicp	1	COG0456	Ribosomal protein S18 acetylase RimI and related acetyltransferases	J
243	GC_00000097	pLaicp	1	COG5464	Predicted transposase YdaD	L
244	GC_00000098	pLaicp	1
245	GC_00000099	p74	1
246	GC_00000100	pLaicp	1
247	GC_00000101	p74	1	COG1330	Exonuclease V gamma subunit	L
248	GC_00000102	p74	1	COG4227	Antirestriction protein ArdC	L
249	GC_00000103	pLaicp	1
250	GC_00000104	pLaicp	1
251	GC_00000105	p74	1	COG1074	ATP-dependent exoDNAse (exonuclease V) beta subunit (contains helicase and exonuclease domains)	L
252	GC_00000106	p74	1	COG0286|COG1111|COG4889	Type I restriction-modification system, DNA methylase subunit|ERCC4-related helicase|Predicted helicase	V|L|R
253	GC_00000107	pD13	1
254	GC_00000108	p74	1	COG1475	Chromosome segregation protein Spo0J, contains ParB-like nuclease domain	D
255	GC_00000109	p74	1	COG0845	Multidrug efflux pump subunit AcrA (membrane-fusion protein)	V|M
256	GC_00000110	pD13	1
257	GC_00000111	p74	1	COG0566	tRNA G18 (ribose-2'-O)-methylase SpoU	J
258	GC_00000112	p74	1	COG2050	Acyl-coenzyme A thioesterase PaaI, contains HGG motif	Q
259	GC_00000113	p74	1	COG1136	ABC-type lipoprotein export system, ATPase component	M
260	GC_00000114	p74	1	COG1309	DNA-binding transcriptional regulator, AcrR family	K
261	GC_00000115	pLaicp	1	COG3935	DNA replication protein DnaD	L
262	GC_00000116	p74	1
263	GC_00000117	pLaicp	1	COG2801	Transposase InsO and inactivated derivatives	X
264	GC_00000118	p74	1	COG3920	Two-component sensor histidine kinase, HisKA and HATPase domains	T
265	GC_00000119	pLaicp	1
266	GC_00000120	pLaicp	1	COG1669	Predicted nucleotidyltransferase	R
267	GC_00000121	p74	1
268	GC_00000122	p74	1	COG0577|COG0577	ABC-type antimicrobial peptide transport system, permease component|ABC-type antimicrobial peptide transport system, permease component	V
269	GC_00000123	pLaicp	1
270	GC_00000124	p74	1
271	GC_00000125	pLaicp	1
272	GC_00000126	p74	1	COG2943	Membrane glycosyltransferase	G|M
273	GC_00000127	p74	1
274	GC_00000128	p74	1
275	GC_00000129	pLaicp	1
276	GC_00000130	pLaicp	1
277	GC_00000131	pLaicp	1	COG4118	Antitoxin component of toxin-antitoxin stability system, DNA-binding transcriptional repressor	V
278	GC_00000132	pD13	1
279	GC_00000133	pLaicp	1
280	GC_00000134	pLaicp	1
281	GC_00000135	p74	1
282	GC_00000136	pLaicp	1
283	GC_00000137	p74	1	COG4118	Antitoxin component of toxin-antitoxin stability system, DNA-binding transcriptional repressor	V
284	GC_00000138	pLaicp	1	COG2801	Transposase InsO and inactivated derivatives	X
285	GC_00000139	p74	1
286	GC_00000140	pLaicp	1	COG2319	WD40 repeat	R
287	GC_00000141	pLaicp	1
288	GC_00000142	p74	1	COG3131	Periplasmic glucans biosynthesis protein	M
289	GC_00000143	p74	1
290	GC_00000144	pLaicp	1
291	GC_00000145	p74	1
292	GC_00000146	p74	1	COG2936	Predicted acyl esterase	R
293	GC_00000147	p74	1
294	GC_00000148	p74	1	COG2801	Transposase InsO and inactivated derivatives	X
295	GC_00000149	pLaicp	1
296	GC_00000150	pLaicp	1
297	GC_00000151	pLaicp	1	COG1475	Chromosome segregation protein Spo0J, contains ParB-like nuclease domain	D
298	GC_00000152	pLaicp	1
299	GC_00000153	p74	1	COG0609	ABC-type Fe3+-siderophore transport system, permease component	P
300	GC_00000154	pLaicp	1
301	GC_00000155	pLaicp	1
302	GC_00000156	p74	1	COG4771	Outer membrane receptor for ferrienterochelin and colicins	P
303	GC_00000157	p74	1	COG0507	ATP-dependent exoDNAse (exonuclease V), alpha subunit, helicase superfamily I	L
304	GC_00000158	p74	1	COG2207	AraC-type DNA-binding domain and AraC-containing proteins	K
305	GC_00000159	p74	1
306	GC_00000160	p74	1
307	GC_00000161	pLaicp	1
308	GC_00000162	p74	1
309	GC_00000163	pLaicp	1
310	GC_00000164	p74	1	COG4558	ABC-type hemin transport system, periplasmic component	P
311	GC_00000165	p74	1	COG2208	Serine phosphatase RsbU, regulator of sigma subunit	T|K
312	GC_00000166	p74	1
313	GC_00000167	p74	1	COG2205	K+-sensing histidine kinase KdpD	T
314	GC_00000168	p74	1
315	GC_00000169	pLaicp	1
316	GC_00000170	pLaicp	1	COG2801	Transposase InsO and inactivated derivatives	X
317	GC_00000171	pD13	1
318	GC_00000172	p74	1	COG1309	DNA-binding transcriptional regulator, AcrR family	K
319	GC_00000173	pLaicp	1
320	GC_00000174	p74	1
321	GC_00000175	pLaicp	1	COG2929	Uncharacterized conserved protein, DUF497 family	S
322	GC_00000176	pLaicp	1
323	GC_00000177	pLaicp	1
324	GC_00000178	pLaicp	1
325	GC_00000179	pLaicp	1
326	GC_00000180	pLaicp	1	COG1848	Predicted nucleic acid-binding protein, contains PIN domain	R
327	GC_00000181	p74	1	COG3422	Uncharacterized conserved protein YegP, UPF0339 family	S
328	GC_00000182	p74	1	COG3720	Putative heme degradation protein	P
329	GC_00000183	pLaicp	1	COG0640	DNA-binding transcriptional regulator, ArsR family	K
330	GC_00000184	p74	1	COG2334	Ser/Thr protein kinase RdoA involved in Cpx stress response, MazF antagonist	T
331	GC_00000185	p74	1	COG0429	Predicted hydrolase of the alpha/beta-hydrolase fold	R
332	GC_00000186	pLaicp	1
333	GC_00000187	pD13	1
334	GC_00000188	pLaicp	1	COG1045	Serine acetyltransferase	E
335	GC_00000189	pLaicp	1
*Core=pLaicp, pDO6 and pD13
*Core_2=pDO6 and pD13

## Sheet: Table S10
Supplementary data 1, Table S10. Average nucleotide identity analysis in Leptospira species
Species/Strains	L. weilii CUDO6	L. weilii CUD13	L. weilii 56105	L. weilii 56145	L. weilii 56621	L. weilii 56622	L. weilii 56646	L. weilii 56655	L. weilii 56674	L. weilii 56679	L. weilii 2006001853	L. weilii 2006001855	L. weilii Ecochalenge	L. weilii L231	L. weilii LNT1194	L. weilii LNT1234	L. weilii LT2116	L. weilii UI13098	L. weilii UT14631	L. interrogans 56601	L. kirschneri 3522 CT	L. noguchii CZ 214	L. alexanderi L60	L. borgpetersenii L550	L. mayottensis 200901116	L. santarosai LT 821	L. alstonii 80-412	L. kmetyi Bejo-Iso9	L. lincerasiae VAR 010	L. wolffii Khorat-H2	L. broomii 5399	L. inadai M34/99	L. fainei BUT6	L. venezuelensis CLM-U50	L. biflexa Patoc I	L. yanagawae Sao Paulo	L. meyeri Went5	L. vanthielii Waz Holland	L. wolbachii CDC	L. terpstrae LT 11-33	L. idonii 201300427
L. weilii CUDO6		99.86	95.59	98.87	98.66	98.65	98.62	99.41	98.5	98.71	99.42	99.01	98.56	98.69	98.52	99.51	95.56	98.57	98.65	80.39	80.64	80.24	94.19	91.01	91.25	87.43	83.97	80.6	68.13	68.29	67.96	68.12	67.98	67.67	65.2	65.12	65.41	65.54	65.4	65.29	66.36
L. weilii CUD13			95.63	98.87	98.66	98.69	98.64	99.5	98.52	98.71	99.41	99.08	98.61	98.76	98.54	99.49	95.57	98.59	98.72	80.4	80.67	80.28	94.24	90.94	91.21	87.48	83.93	80.71	68.27	68.44	67.96	68.08	68.16	68.02	65.07	65.19	65.27	65.13	65.24	65.37	66.33
L. weilii 56105				95.6273	95.6494	95.7238	95.6956	95.6103	95.5201	95.7338	95.6596	95.6119	95.6554	95.7019	95.4732	95.655	98.0627	95.5978	95.7174	80.66	80.82	80.45	94.41	91	91.47	87.69	83.84	80.47	68.16	68.3	68.87	67.97	68.06	67.99	65.22	65.27	65.51	65.21	65.17	65.32	66.2
L. weilii 56145					98.7443	98.8356	98.8245	98.8749	98.785	98.7684	98.8628	98.8489	98.79	98.85	98.72	98.86	95.76	98.78	98.77	80.36	80.65	80.31	94.4	90.94	91.38	87.68	84.04	80.79	68.12	68.34	67.94	68.05	68.08	67.81	65	65.01	65.31	65.28	65.26	65.34	66.47
L. weilii 56621						99.2352	99.2065	98.5027	99.1367	99.4683	98.6406	98.9006	98.69	99.53	99.57	98.75	95.71	99.49	99.24	80.42	80.69	80.44	94.3	91.04	91.15	87.72	84.06	80.54	68.03	68.17	67.93	68.02	67.91	67.93	65.16	65.13	65.36	65.25	65.26	65.34	66.11
L. weilii 56622							99.6832	98.6217	99.127	99.2671	98.6844	98.8268	98.86	99.27	99.32	98.74	95.79	99.24	99.22	80.58	80.71	80.32	94.21	90.95	91.1	87.76	83.95	80.62	68.04	68.21	67.85	67.92	67.94	67.64	65.1	64.98	65.34	65.18	65.32	65.57	66.09
L. weilii 56646								98.589	99.1035	99.2533	98.6222	98.7845	98.86	99.25	99.29	98.72	95.77	99.24	99.25	80.52	80.73	80.41	94.19	90.94	91.01	87.75	84.06	80.55	68.03	68.31	67.97	68	68.02	67.74	65.08	64.95	65.36	65.14	65.26	65.4	66.11
L. weilii 56655									98.7068	98.71	99.5589	98.9882	98.67	98.7	98.76	99.45	95.63	98.57	98.67	80.41	80.61	80.25	94.13	90.96	91.37	87.63	84.06	80.72	68.04	68.36	67.98	68.01	67.98	67.79	64.87	65.12	65.12	65.13	65.13	65.39	66.17
L. weilii 56674										99.1263	98.5221	98.9261	98.97	99.11	98.91	98.67	95.68	98.92	99.21	80.36	80.71	80.35	94.35	90.88	91.34	87.73	84	80.84	68.04	68.45	68.03	68.03	67.82	67.76	65.13	65.16	65.39	65.16	65.26	65.41	66.14
L. weilii 56679											98.6711	98.9635	98.77	99.67	99.54	98.8	95.68	99.54	99.21	80.5	80.6	80.37	94.21	90.9	90.96	87.6	83.98	80.53	68.22	68.26	68	67.95	68.08	67.97	65.2	65.21	65.29	65.34	65.24	65.43	66.21
L. weilii 2006001853												99.0575	98.6	98.71	98.52	99.47	95.7	98.58	98.6	80.48	80.62	80.28	94.24	90.98	91.26	87.6	84.02	80.73	68.11	68.27	67.92	68.07	67.97	67.92	65.01	65.25	65.2	65.09	65.13	65.23	66.22
L. weilii 2006001855													98.79	98.95	99.06	99.03	95.6	98.82	98.78	80.31	80.74	80.28	94.18	90.92	91.24	87.65	84	80.65	68.02	68.28	68.06	67.97	67.95	67.76	65.08	65.15	65.23	65.3	65.2	65.41	66.32
L. weilii Ecochalenge														98.7546	98.8407	98.6745	95.7673	98.8382	98.8044	80.44	80.75	80.35	94.26	90.85	91.3	87.85	84.07	80.79	68.35	68.27	68.13	68.08	68.13	68.04	65.09	65.39	65.32	65.22	65.35	65.4	66.37
L. weilii L231															99.6346	98.8738	95.6922	99.5784	99.2465	80.62	80.77	80.36	94.23	90.94	91.06	87.66	83.95	80.6	68.02	68.2	67.92	67.92	67.99	67.74	65.05	64.97	65.2	65.11	65.16	65.19	66.08
L. weilii LNT1194																98.6486	95.7607	99.5589	99.2875	80.36	80.72	80.31	94.23	90.95	91.09	87.48	83.94	80.49	68.31	68.25	68.08	68.17	68.11	67.92	65.12	65.27	65.4	65.3	65.2	65.37	66.1
L. weilii LNT1234																	95.6169	98.6926	98.669	80.43	80.67	80.5	94.12	90.88	90.96	87.5	83.99	80.74	68.16	68.15	68.02	67.91	67.9	67.78	65.04	65.12	65.34	65.1	65.23	65.28	66.22
L. weilii LT2116																		95.7288	95.6539	80.67	80.88	80.5	94.33	91.01	91.55	87.75	83.97	80.58	68.14	68.21	67.91	68	67.94	67.9	65.05	65.22	65.27	65.34	65.3	65.36	66.07
L. weilii UI13098																			99.2877	80.52	80.68	80.36	94.1	90.93	91.04	87.47	83.85	80.47	68.06	68.24	67.87	68.11	68.09	67.89	65.3	65.28	65.36	65.24	65.35	65.35	66.18
L. weilii UT14631																				80.56	80.65	80.37	94.13	90.99	91.1	87.63	83.97	80.49	68.19	68.19	68.11	68.02	67.97	67.81	64.97	65.14	65.32	65.25	65.13	65.3	65.97
L. interrogans 56601																					91.26	89.72	80.69	80.32	80.49	79.98	80.53	78.36	68.24	67.74	67.73	67.55	67.61	68.4	65.49	65.58	65.79	65.71	65.69	65.89	66.09
L. kirschneri 3522 CT																						90.41	80.99	80.78	80.85	80.52	81.06	78.98	68.37	68.01	68.16	67.84	67.76	68.45	65.34	65.46	65.66	65.53	65.59	65.64	66.24
L. noguchii CZ 214																							80.63	80.42	80.59	80.13	80.6	78.61	68.2	67.65	67.57	67.66	67.8	68.42	65.44	65.49	65.86	65.59	65.54	65.72	65.97
L. alexanderi L60																								91.73	92.36	88.24	84.42	80.46	68.11	68.17	67.96	67.85	67.92	67.97	65.1	65.25	65.37	65.39	65.37	65.36	66.21
L. borgpetersenii L550																									91.78	87.67	83.41	80.38	68.07	68.3	67.97	67.88	67.76	67.92	65.17	65.12	65.36	65.48	65.34	65.23	66.26
L. mayottensis 200901116																										87.47	83.46	80.13	68.04	68.14	67.95	67.8	67.9	68	65.21	65.38	65.64	65.35	65.38	65.48	66.25
L. santarosai LT 821																											83.35	80.94	68.25	68.51	68.2	68.35	68.22	68	65.08	65.29	65.23	65.26	65.29	65.2	66.11
L. alstonii 80-412																												82.08	68.15	68.41	68.1	68.28	67.98	67.85	64.97	64.98	65.11	65.13	65.21	65.22	66.17
L. kmetyi Bejo-Iso9																													68.15	68.68	68.03	68.23	67.96	67.88	65.03	64.9	65.16	65.21	65.08	65.28	66.36
L. lincerasiae VAR 010																														73.96	70.63	70.36	70.48	86.66	65.04	65.27	65.47	65.49	65.26	65.44	66.36
L. wolffii Khorat-H2																															70.88	71.16	70.9	73.35	64.91	64.97	65.14	65.19	64.94	65.13	66.2
L. broomii 5399																																90.14	86.86	70.33	64.75	64.81	64.93	64.95	65.01	64.98	65.89
L. inadai M34/99																																	86.08	70.07	64.74	64.69	64.77	64.82	64.89	65.06	65.85
L. fainei BUT6																																		70.42	64.84	64.82	64.98	64.86	64.98	64.78	65.76
L. venezuelensis CLM-U50																																			65.32	65.42	65.58	65.65	65.47	65.64	66.1
L. biflexa Patoc I																																				81.8	77.52	77.1	77.11	77.27	69.99
L. yanagawae Sao Paulo																																					77.2	77.03	76.87	76.97	70.03
L. meyeri Went5																																						81.86	82.2	81.6	70.33
L. vanthielii Waz Holland																																							89.87	85.68	70.22
L. wolbachii CDC																																								85.36	70.23
L. terpstrae LT 11-33																																									70.18
L. idonii 201300427

[truncated: 3 more sheets: Table S11, Table S12, Table S13]
